# Supplementary material
Source: PubMed Central journal article supplement (PMC7948260)
Supplement: advancesADV2020003444-suppl1.pdf [file advancesADV2020003444-suppl1.pdf]

# Supplemental Data

|                                                                           |    |
|---------------------------------------------------------------------------|----|
| Supplemental Patients and Methods.....                                    | 2  |
| Patients and Samples .....                                                | 2  |
| Clinical and Biological data.....                                         | 3  |
| Validation cohort.....                                                    | 3  |
| NGS Sequencing and Analysis .....                                         | 4  |
| Statistical analysis .....                                                | 8  |
| Supplemental References.....                                              | 12 |
| Supplemental Figures .....                                                | 14 |
| Supplemental Tables .....                                                 | 24 |
| List of mutations in the whole cohort.....                                | 35 |
| Checklist for REporting of tumor MARKer Studies (REMARK) guidelines ..... | 76 |

## Supplemental Patients and Methods

### Patients and Samples

497 unselected patients from 24 French hospitals enrolled into the French Observatory of Myelofibrosis were included in the study. Participating centers were: CHU Angers (n=82), APHP Paris St Louis (n=69), CHU Brest (n=51), CH Lens (n=27), Bordeaux Bergonié (n=26), CHU Toulouse (n=26), CHU Limoges (n=24), CHU Nantes (n=18), CHU Dijon (n=16), CHU Nancy (n=16), CHU Poitiers (n=16), Marseille IPC (n=15), CH Annecy (n=14), CHU Bordeaux (n=14), CH Périgeux (n=14), APHP Paris Cochin (n=13), APHP Paris Créteil (n=11), CH Arras (n=9), CHU Grenoble (n=9), CH Avignon (n=8), CHU Lille (n=7), Lille GHICL (n=5), CH Le Mans (n=4), CH Rochefort (n=4). Samples were identified through FIMBANK, a national network of biological resources for myeloproliferative neoplasms (grant INCa, BCB 2013, Pr Valérie Ugo) and were centralized for genomic analysis.

The French Intergroup of Myeloproliferative neoplasms (FIM) observatory of myelofibrosis has been approved by the French CNIL (National Committee of Informatics and Freedom) and CCTIRS (French Advisory Committee for Data Processing in Health Research) with approvals numbers CCTIRS 12.610 and CNIL DR-2014-324. Patients were informed in accordance with French ethical guidelines and the Declaration of Helsinki.

All diagnoses were made according strictly to the WHO 2008 or 2016 classification (bone marrow biopsy mandatory). Diagnosis criteria were secondarily confirmed by clinicians, biologists and pathologists from the FIM group and 322 bone marrow biopsies (67%) were also reviewed by the French Bone Marrow Biopsy Study Group (GEBOM). This led to the exclusion of 8 patients reclassified as MPN without fibrosis (n=3), myelodysplastic syndrome with fibrosis (n=2) and chronic neutrophilic leukemia with fibrosis (n=3). Two other patients were excluded from the study after NGS because of an atypical mutational profile that led to further

reviewing of the diagnostic by clinicians and biologists (one patient with acute myeloid leukemia with fibrosis and one chronic myelomonocytic leukemia, see Supplemental Figure 1).

### **Clinical and Biological data**

Clinical and biological data at diagnosis and follow-up were extracted from the database of the French Observatory of Myelofibrosis (SIBM, Saint-Louis Hospital, Paris). A karyotype was performed at the time of myelofibrosis diagnosis in 294 patients with a failure rate of 10% (n=29). Thus, a karyotype result was available in 265 patients (172 PMF and 93 SMF). Previous prognostic scores were calculated for each patient at the time of diagnosis: IPSS and DIPSS-plus, MIPSS70 and MIPSS70v2 for primary myelofibrosis and MYSEC-PM, MIPSS70 and MIPSS70v2 for secondary myelofibrosis<sup>1-4</sup>. Of note MIPSS70 and MIPSS70v2 have been developed for primary and not for secondary myelofibrosis. Missing data were represented in Supplemental Figure 10 and patients with at least one missing data were compared to patients without to ensure that those patients were not associated to a particular presentation (Supplemental Table 11).

### **Validation cohort**

For validation of our results we used data previously published by *Grinfeld et al* in New England Journal of Medicine in 2018; 379:1416-1430<sup>5</sup>. Data were available in Github (<https://github.com/gerstung-lab/MPN-multistage>). In this study, the mutational landscape of 2035 MPN was analyzed including 309 myelofibrosis (either primary or secondary) and the multistage model for prognosis was performed on 1875 patients including 276 with myelofibrosis (described as the training cohort in the article of Grinfeld et al.). Thus, we used as a validation set the data available for the 276 myelofibrosis (genomic, age, blood count). Events in the validation cohort were leukemic transformation in 31 patients and deaths in 118 patients.

## NGS Sequencing and Analysis

### *Library preparation*

A custom RNA-baits was designed in order to cover all coding exons of the 77 genes of interest (listed below).

#### *List of the 77 genes sequenced*

|         |        |       |       |        |        |       |        |
|---------|--------|-------|-------|--------|--------|-------|--------|
| ABL1    | CALR   | EED   | HRAS  | KMT2C  | PAX5   | SH2B3 | TET2   |
| ACD     | CBL    | ETNK1 | IDH1  | KMT2D  | PDS5B  | SMC1A | TP53   |
| ANKRD26 | CEBPa  | ETV6  | IDH2  | KRAS   | PHF6   | SMC3  | U2AF1  |
| ASXL1   | CHEK2  | EZH2  | IKZF1 | MAD1L1 | PPM1D  | SRP72 | U2AF2  |
| ASXL2   | CSF3R  | FBXW7 | JAK1  | MPL    | PTEN   | SRSF2 | WT1    |
| ATM     | CTCF   | FLT3  | JAK2  | NF1    | PTPN11 | STAG1 | ZBTB33 |
| ATRX    | CUX1   | GATA1 | KDM6A | NFE2   | RAD21  | STAG2 | ZRSR2  |
| BCL11A  | DDX41  | GATA2 | KIT   | NOTCH1 | RUNX1  | SUZ12 |        |
| BCOR    | DNMT3A | GNAS  | KMT2A | NPM1   | SETBP1 | TERC  |        |
| BCORL1  | DOT1L  | HMGA2 | KMT2B | NRAS   | SF3B1  | TERT  |        |

DNA was quantified with Qubit™ dsDNA BR Assay Kit. We used the SureSelectQXT Target kit from Agilent to build the libraries according to the manufacturer's recommendations. Approximately 50ng of DNA for each patient was randomly fragmented with enzymes and adaptor-tagged in the first step. The DNA library was then amplified by PCR, and the amplicons purified with AMPure XP Beads, Beckman Coulter. DNA library quality was assessed using the Agilent 2100 Bioanalyzer and Agilent DNA 1000 Assay, and quantified with the Qubit™ dsDNA HS Assay Kit. Between 500 and 750ng of the amplicons was hybridized using the SureSelect Capture Library and then captured on streptavidin-coated beads, to obtain an enriched targeted DNA-library. The library was PCR-amplified by using Dual Indexing primers, and purified with AMPure XP Beads, Beckman Coulter.

### *Next-generation sequencing*

The final quality was checked with the Agilent 2100 Bioanalyzer and Agilent High Sensitivity DNA Assay, and the quantity by using the Qubit™ dsDNA HS Assay Kit. Libraries were

pooled for multiplex sequencing on a NextSeq500, Illumina, with High or Mid Output Kit v2 300 cycles to ensure a theoretical minimum depth of 4000X.

### ***Bioinformatic pipeline***

We developed a bioinformatic pipeline to analyze sequencing data in order to control each step of analysis (SMPHD 2.8).

- Demultiplexing and alignment

First, demultiplexing step with bcl2fastq (version v2.20.0.422) was done. Then, the quality of FASTQ files was checked using Fastqc tool (version 0.11.8). For each paired of FASTQ files, alignment against reference genome hg19 (2013) was done with BWA (bwa 0.7.17-r1188). A BAM file was generated using samtools 1.9 and was intersected to the BED file of the sequenced panel using bedtools v2.27 to keep reads in the region of the panel. After this step, duplicate reads were tagged but not removed using Mark duplicates (dupmark 2.18.23-SNAPSHOT). Finally, coverage was analyzed for each panel gene with bedtools coverage (v2.27.1-65-gc2af1e7-dirty -sorted). A R script allowed to generate and report coverage quality in a html file. This file provided median and mean of coverage, percent of bases upper to 200X and exons with a coverage below 500X in the panel.

- Variant calling

Four different tools (GATK with methods of Haplotype caller, Mutect2 (provided by GATK to detect somatic mutation), VarScan (general) and Pindel (only for long deletions or insertions)) were used for variant calling in order to detect mutations with optimal accuracy.

Details of tools and parameters are detailed below:

- **GATK Haplotype caller** (4.1.2.0) was used following the GATK best practices. A base recalibration with dbSNP138 was performed. Haplotype caller was launched with parameters `--min-base-quality-score 30` and `--dont-use-soft-clipped-bases true`.
- **Mutect2** (4.1.2.0) is more precise than GATK haplotype caller to detect somatic mutation and was used with the same parameters than for GATK HC.
- **Varscan** (2.4.3). Primary, we used samtools mpileup with default value parameter (`-Q 13 -q 0 -A -B -d 100000`). Then, Varscan calling was performed with the following parameters: `--min coverage 50 --min-reads2 8 --min-avg-qual 30 --min-var-freq 0.02 --p-value 0.1 --strand-filter 0`.
- **Pindel** (0.2.5) used a primary bam file with unalignment reads. In our case we used this variant calling to detect *FLT3*-ITD mutations or in *CALR* driver mutations. As parameter of length of variant, we used a 500 pb-max insertion or deletion.
  - o Annotation and filter

We use software Annovar (version 2018-04-16) to annotate all called variants. We have made annotations separately for each variant calling method. Annovar allows to download main database of annotation. As database of annotation, we used:

- COSMIC90 (Release 5 September 2019) Catalogue Of Somatic Mutations In Cancer
- COSMIC 89 (Release) to validate and support new version of cosmic 90
- gnomad 2.1.1 Exomes (Update, March 6, 2019): to know variant frequency in world population
- dbnsfp35a (20180921): Score columns like (whole-exome SIFT, PolyPhen2 HDIV, PolyPhen2 HVAR, LRT, MutationTaster, MutationAssessor, FATHMM, PROVEAN, MetaSVM, MetaLR, VEST, M-CAP, CADD, GERP++, DANN, fathmm-MKL, Eigen, GenoCanyon, fitCons, PhyloP and SiPhy scores from dbNSFP) to classify impact of mutation

- clinvar (20190305) Clinical Data. This descriptor allows to know clinical effect of variant
- cytoBand to know position in chromosome
- IARC TP53 Database July 2019, a WHO database of TP53 mutations

Then, we obtained a vcf for each variant calling tool. Finally, we used pandas (a module of python3.6.9) to merge the four files, to calculate the variant allele frequency (mean of VAF for each caller) and to filter mutations.

The filters applied were as follows:

- Intronic and synonymous mutations were removed
- Variants with VAF < 2% were removed
- Variants with a minor allele frequency (MAF)  $\geq$  1% in a gnomad population were removed
- Variants known as recurring artifact (manually curated and stocked in a local database) were removed

### ***Review and classification of mutations***

Finally, retained variants were reviewed by 2 molecular biologists from the French Intergroup of Myeloproliferative neoplasms (DLP and BC, EV, AC, AM, OM or IS) for (i) visual inspection of reads in BAM file to conclude for real mutation or artifact and for (ii) classification of the pathogenicity of mutations. Cases of discrepancies were discussed in concertation meetings. The classification of mutations was based on the consensus recommendation of the Association for Molecular Pathology and the American Society of Clinical Oncology<sup>6</sup>. Variants were classified as pathogenic, likely pathogenic or of unknown significance according to the following criteria.

### *Classification of additional mutations*

|                                 |                                                                                                                                                                      |
|---------------------------------|----------------------------------------------------------------------------------------------------------------------------------------------------------------------|
| Pathogenic                      | - Mutation non-sens or frameshift<br>- Mutation described in myeloid malignancy (COSMIC) with somatic validation<br>- Mutation with a functional effect demonstrated |
| Likely Pathogenic               | - Mutation not classified as pathogenic with a VAF <40% or >60%                                                                                                      |
| Variant of Unknown Significance | - Mutation not classified as pathogenic or likely pathogenic with a VAF between 40 and 60 %                                                                          |

Furthermore, we decided also to remove all mutations with a MAF  $\geq 0.01\%$  in the category of variant of unknown significance because they were probably rare polymorphisms.

### *Quality assessment*

The quality of both sequencing and bioinformatics were checked by analysis in each sequencing run of a commercial internal quality control with 22 mutations including VAF of 5 to 70% and long deletions/insertions (Horizon Myeloid DNA-HD829). A run was analyzed only if all the mutations of this control were detected. Furthermore, our lab participates every year at the external quality evaluation from the French Group of Molecular Biology in Hematologic Malignancies (GBMHM).

### **Statistical analysis**

#### *Sample size justification*

To demonstrate a prognostic effect of the five major genes in myelofibrosis (*ASXL1*, *EZH2*, *SRSF2* and *IDH1/2*), i.e. an increase in hazard ratio of 100%, 450 patients are required. This sample size was calculated according to an overall event rate of 29%<sup>3</sup>, a control of the conjunctive power of 80% and a control of the FWER of 5% (with Bonferonni procedure)<sup>7</sup>.



### ***Descriptive analysis***

Quantitative variables were reported as median and ranges and qualitative variables as proportions. Comparisons were performed using Mann and Whitney test for quantitative variables and Fisher test for qualitative variables. All p-values were corrected using a Benjamini-Hochberg procedure in order to control the False Discovery Rate.

### ***Bayesian network and identification of genomic subgroups in myelofibrosis***

A Bayesian Network (BN) was performed by first creating a binary matrix indicating the presence of mutation for genes mutated in at least 20 patients in the whole cohort (4% of the population). Analysis was performed using *bnlearn* package under R software<sup>8</sup>. In details, a forward selection technique for neighborhood detection based on the maximization of the minimum association measure observed with any subset of the nodes selected in the previous iterations. It learns the underlying structure of the Bayesian network (all the arcs are undirected, no attempt is made to detect their orientation)<sup>9</sup>.

Hierarchical clustering analysis (HCA) was performed to create homogeneous genes mutated groups based on the selected genes in the BN. This analysis was performed using the Ward's method for linkage criteria combined with a Euclidean distance measure. Finally, groups were determined using BN, HCA and, to be consistent with the available knowledge, with the BN described in *Grinfeld et al.* (N=2035 patients)<sup>5</sup>. To explain the prognostic impact of the groups, a cox model was performed and allowed the clustering in four groups (*TP53*, High-risk, *ASXL1* only and other) according to their impact on overall survival. In this analysis, proportionality was checked using scaled-Schonfeld residuals.

### ***Multiple testing***

To describe the association between each gene mutated and the type of myelofibrosis or driver mutation, a Benjamini-Hochberg multiple comparison procedure was performed to control the

False-Discovery Rate (FDR) at the level of 5%. All p-values presented in the manuscript were adjusted p-values.

### ***Missing data***

No imputation of missing data was performed. However descriptive analysis using *missforest* package of these data was performed and compared to no missing data in order to discuss about a potential bias.

### ***Multistate model***

This model aims to decipher the natural history of myelofibrosis and variable associated with each transition. Therefore individual Cox proportional hazard models were performed for transitions from (i) myelofibrosis chronic phase to acute myeloid leukemia, (ii) myelofibrosis chronic phase to death and (iii) acute myeloid leukemia to death. Time zero was taken to be the time of diagnosis of primary or secondary myelofibrosis. Observations were right-censored at the end of the follow-up. Considering a median time of 17 days between diagnosis and sampling, time zero was the diagnosis time.

Variables included in the model were:

Demographic:

- Gender (female as reference)
- Age at diagnosis, years (continue variable)

Clinical and biological features at diagnosis:

- Type of myelofibrosis (primary myelofibrosis as reference)
- Hemoglobin level, g/dL (continue variable)
- Leukocytes count,  $10^9/L$  (continue variable)
- Platelets count,  $10^9/L$  (continue variable)

Molecular:

- Driver mutation (*JAK2* as reference)
- Genomic groups defined as TP53, High-risk, ASXL1 and Other (reference as Other)

A manual backward step by step selection was done except for the interest variable, i.e. genomics groups. Variance inflation factor (VIF) was computed to check the absence of collinearity against dependent variables. Scaled-Schonfeld residuals were computed to check the proportionality assumption. Statistical tested was performed to validate the non-proportionality combined with a plot of these residuals against time.

These individuals' transition models were used to perform a single multistate model, and death was the only state considered as terminal event. The structure of this model was represented in the following diagram:

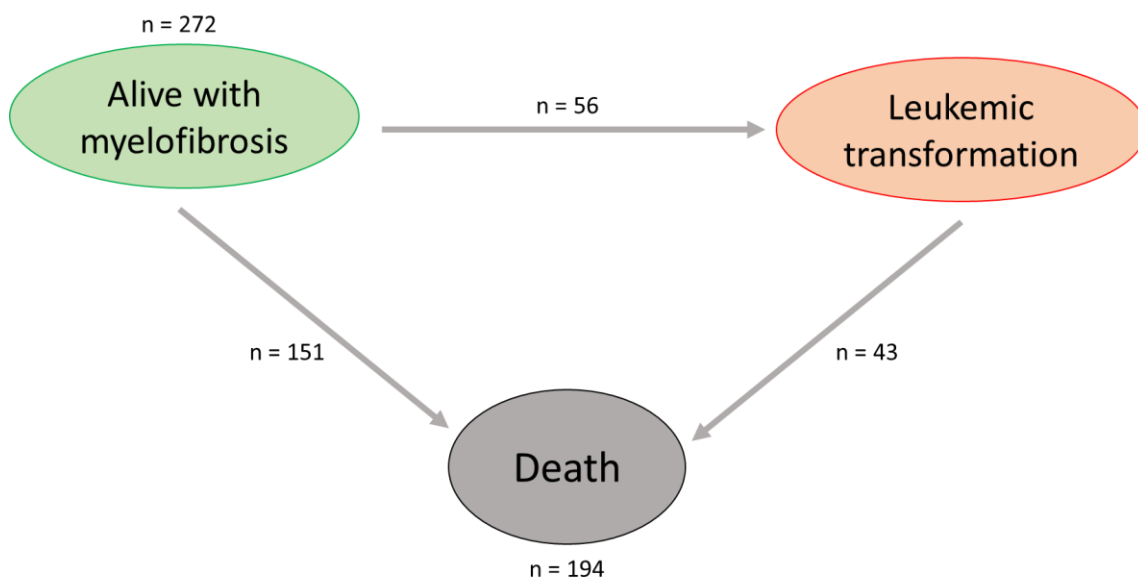

Analysis was performed using *mstate* package. Furthermore, two sensitivity analyses considering (i) a left-censored model from the time of diagnosis to time of sample as time zero or (ii) a right-censored model at the date of transplant for patients receiving bone marrow transplantation were performed.

Finally, an external validation was carried out using the *Grinfeld et al.* cohort of 276 myelofibrosis<sup>5</sup>.

### ***Prognostic evaluation***

To evaluate the added value of genomic classification to classical prognostic tools (see section Clinical and Biological data), we computed the time-dependent AUC (area under receiving operating curve), Brier score and C-index. Indeed, the concordance of models was evaluated using C-index and AUC and the accuracy of the prediction was assessed using the Brier score (integrated Brier score and Brier score over-time). A graphical approach for time-dependent AUC and Brier score over-time was realized to have a global evaluation of each prognostic tool. These analysis were performed with the following R packages: *pec*, *timeROC*, *pROC* and *survival*<sup>10, 11</sup>.

### **Supplemental References**

1. Cervantes F, Dupriez B, Pereira A, et al: New prognostic scoring system for primary myelofibrosis based on a study of the International Working Group for Myelofibrosis Research and Treatment. *Blood* 113:2895–2901, 2009
2. Gangat N, Caramazza D, Vaidya R, et al: DIPSS Plus: A Refined Dynamic International Prognostic Scoring System for Primary Myelofibrosis That Incorporates Prognostic Information From Karyotype, Platelet Count, and Transfusion Status. *J Clin Oncol* 29:392–397, 2011
3. Guglielmelli P, Lasho TL, Rotunno G, et al: MIPSS70: Mutation-Enhanced International Prognostic Score System for Transplantation-Age Patients With Primary Myelofibrosis. *J Clin Oncol* 36:310–318, 2018
4. Tefferi A, Guglielmelli P, Lasho TL, et al: MIPSS70+ Version 2.0: Mutation and Karyotype-Enhanced International Prognostic Scoring System for Primary Myelofibrosis. *J Clin Oncol* 36:1769–1770, 2018

5. Grinfeld J, Nangalia J, Baxter EJ, et al: Classification and Personalized Prognosis in Myeloproliferative Neoplasms. *N Engl J Med* 379:1416–1430, 2018
6. Li MM, Datto M, Duncavage EJ, et al: Standards and Guidelines for the Interpretation and Reporting of Sequence Variants in Cancer: A Joint Consensus Recommendation of the Association for Molecular Pathology, American Society of Clinical Oncology, and College of American Pathologists. *J Mol Diagn* 19:4–23, 2017
7. Delorme P, de Micheaux PL, Liquet B, et al: Type-II generalized family-wise error rate formulas with application to sample size determination: Type-II generalized family-wise error rate formulas with application to sample size determination. *Stat Med* 35:2687–2714, 2016
8. Scutari M: Learning Bayesian Networks with the **bnlearn** R Package. *J Stat Softw* 35:1–22, 2010
9. Tsamardinos I, Brown LE, Aliferis CF: The max-min hill-climbing Bayesian network structure learning algorithm. *Mach Learn* 65:31–78, 2006
10. van de Wiel MA, Berkhof J, van Wieringen WN: Testing the prediction error difference between 2 predictors. *Biostatistics* 10:550–560, 2009
11. Blanche P, Dartigues J-F, Jacqmin-Gadda H: Estimating and comparing time-dependent areas under receiver operating characteristic curves for censored event times with competing risks. *Stat Med* 32:5381–5397, 2013

## Supplemental Figures

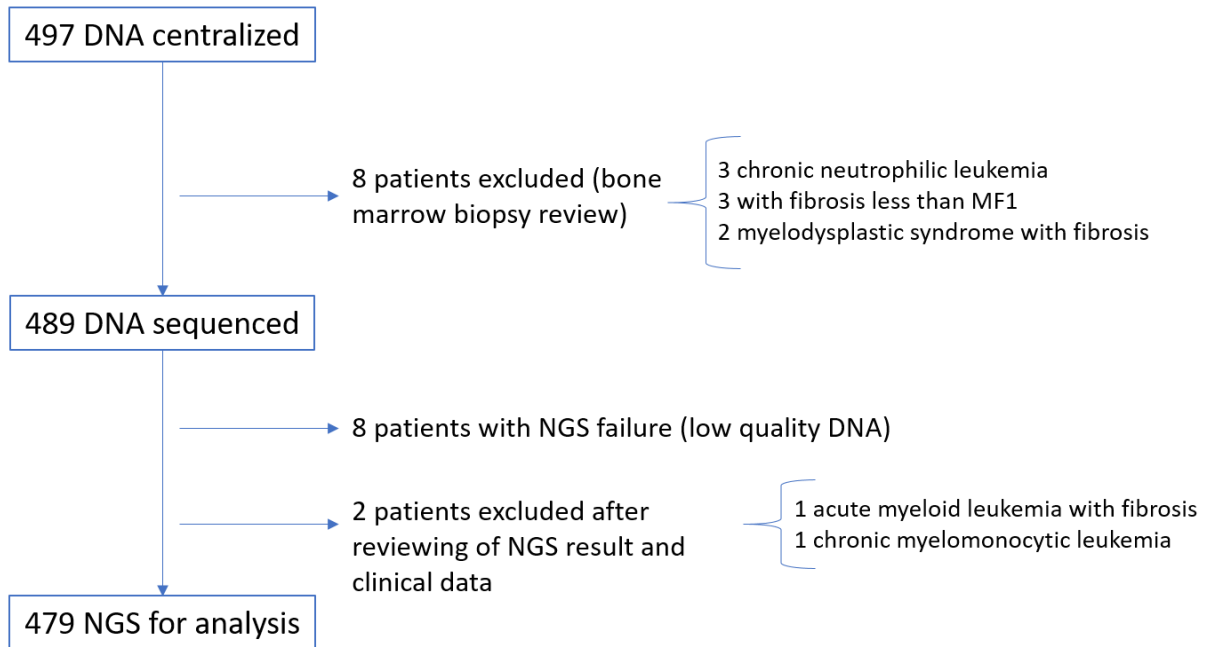

**Supplemental Figure 1:** Flow-chart of the selected patient's samples for the analysis

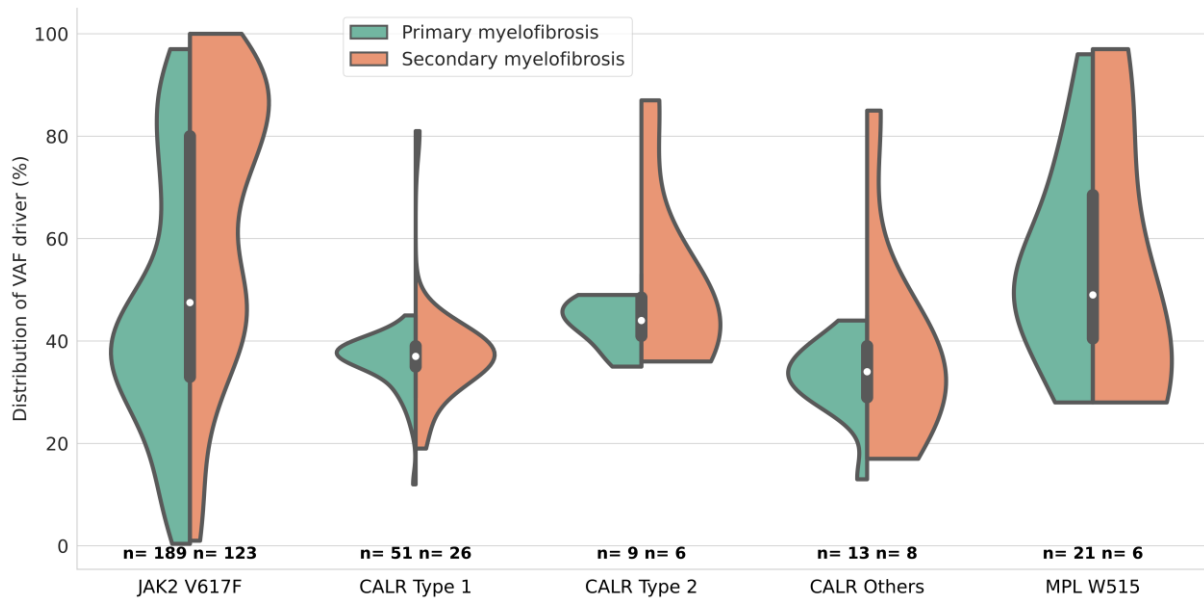

**Supplemental Figure 2:** Allele burden of driver mutations according to the type of myelofibrosis

Only the mutation with the higher allele burden was represented for patients with two driver mutations

### TUMOR SUPPRESSOR GENES

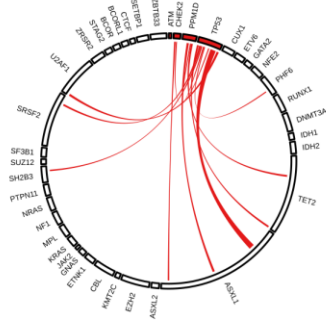

### TRANSCRIPTION FACTORS

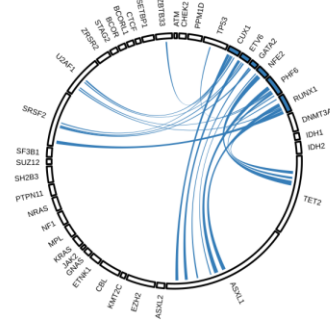

### DNA METHYLATION

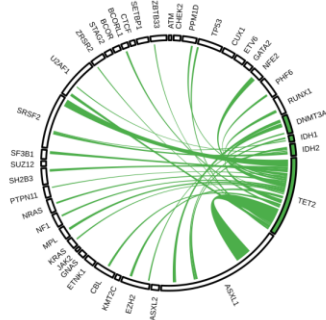

### HISTONE MODIFICATION

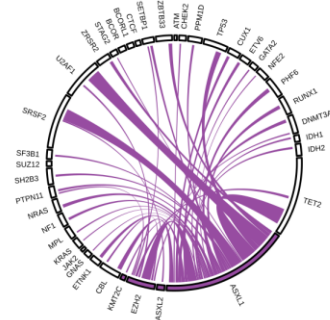

### SIGNALLING

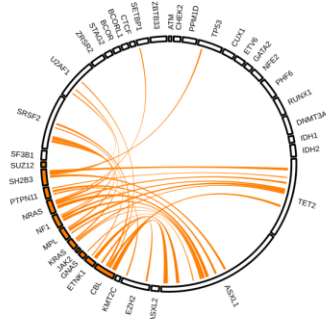

### SPLICEOSOME

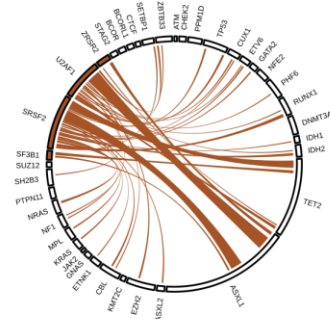

**Supplemental Figure 3:** Association of pairwise mutations represented by circus plot for each functional category of mutated genes.



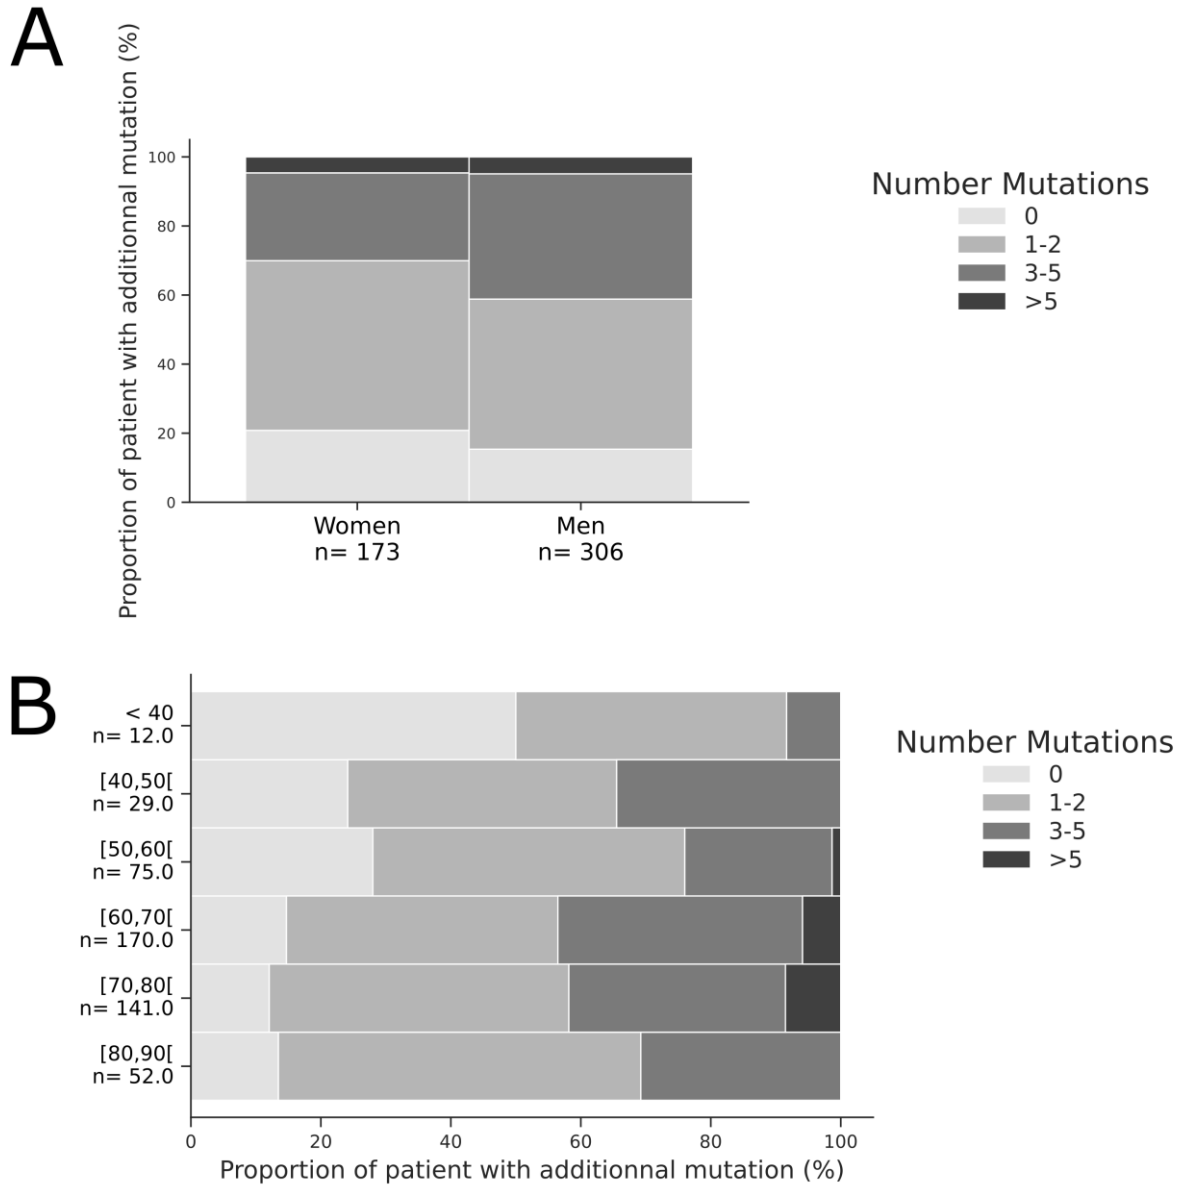

**Supplemental Figure 4:** Distribution of the number of additional mutations according to gender (A) and the age at diagnosis of myelofibrosis (B)

*Only pathogenic and likely pathogenic mutations were considered*

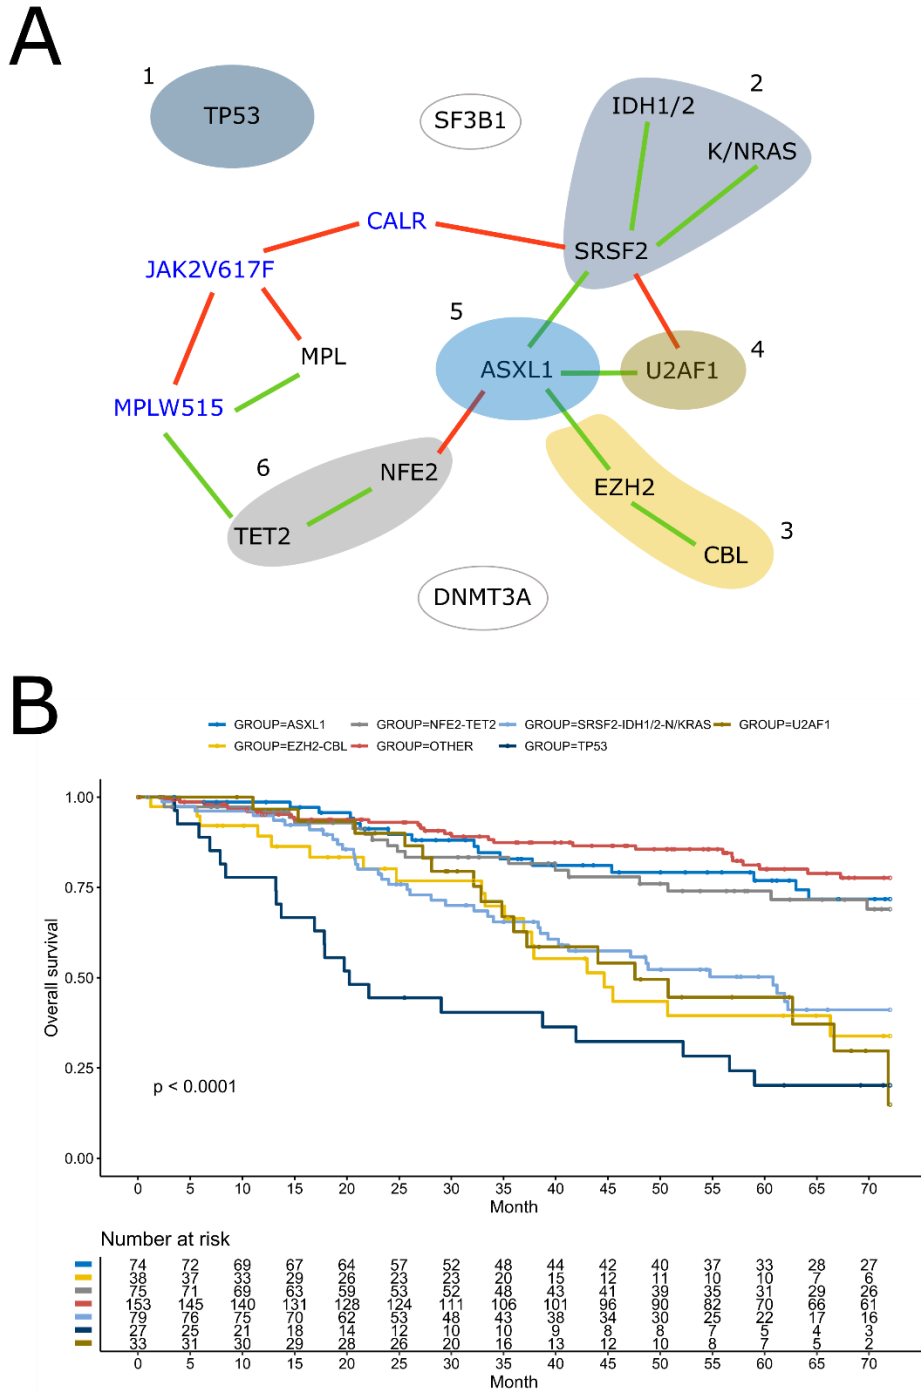

**Supplemental Figure 5: (A)** The seven genomic groups established on the Bayesian network and on the hierarchical clustering analysis (numbers represent the order of attribution in each group).

**(B)** Overall survival for the seven genomic groups. We merged groups with similar OS to generate 4 groups instead of the 7 shown (main manuscript **Figure 3A**).

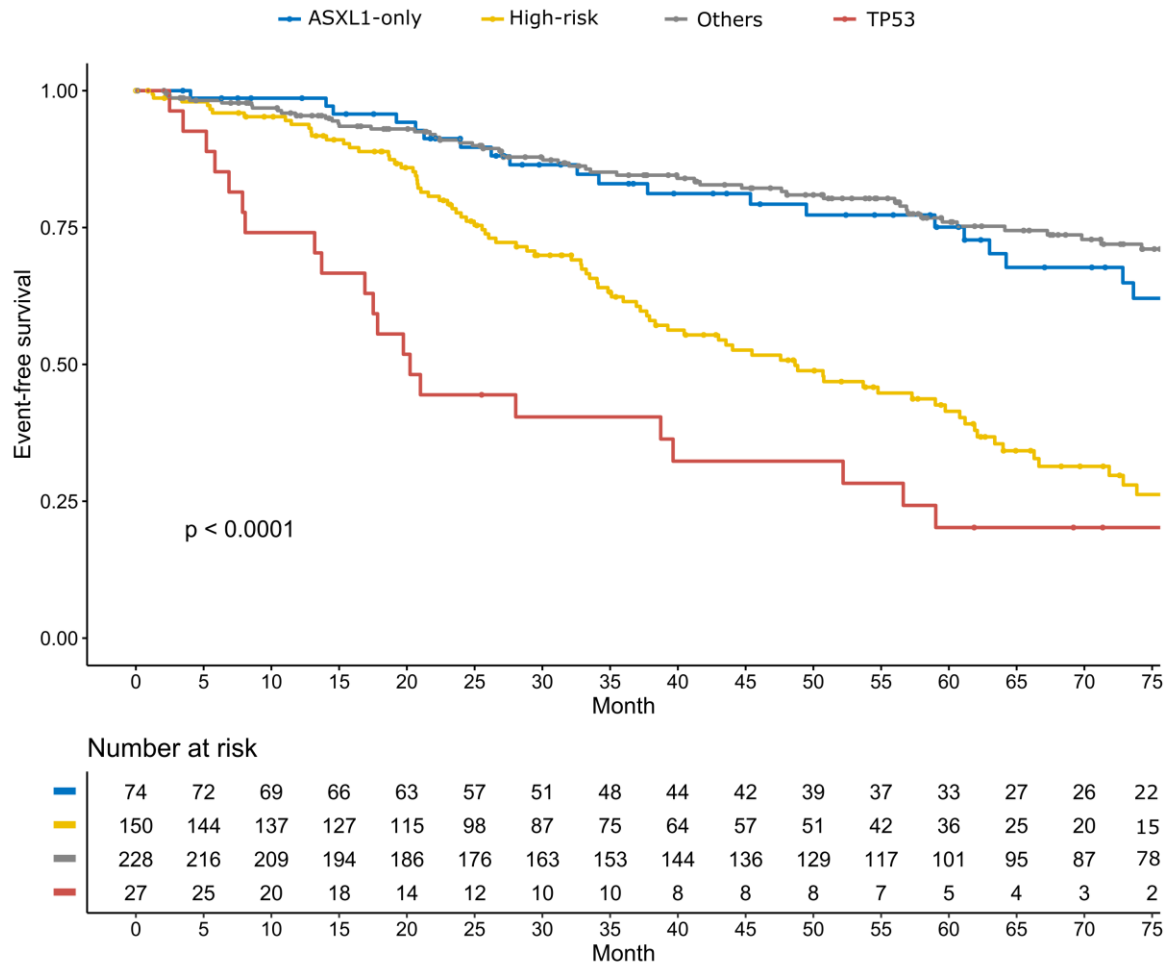

**Supplemental Figure 6:** Leukemia-free survival according to the genomic groups

Leukemia-free survival take into account leukemic transformation and death.

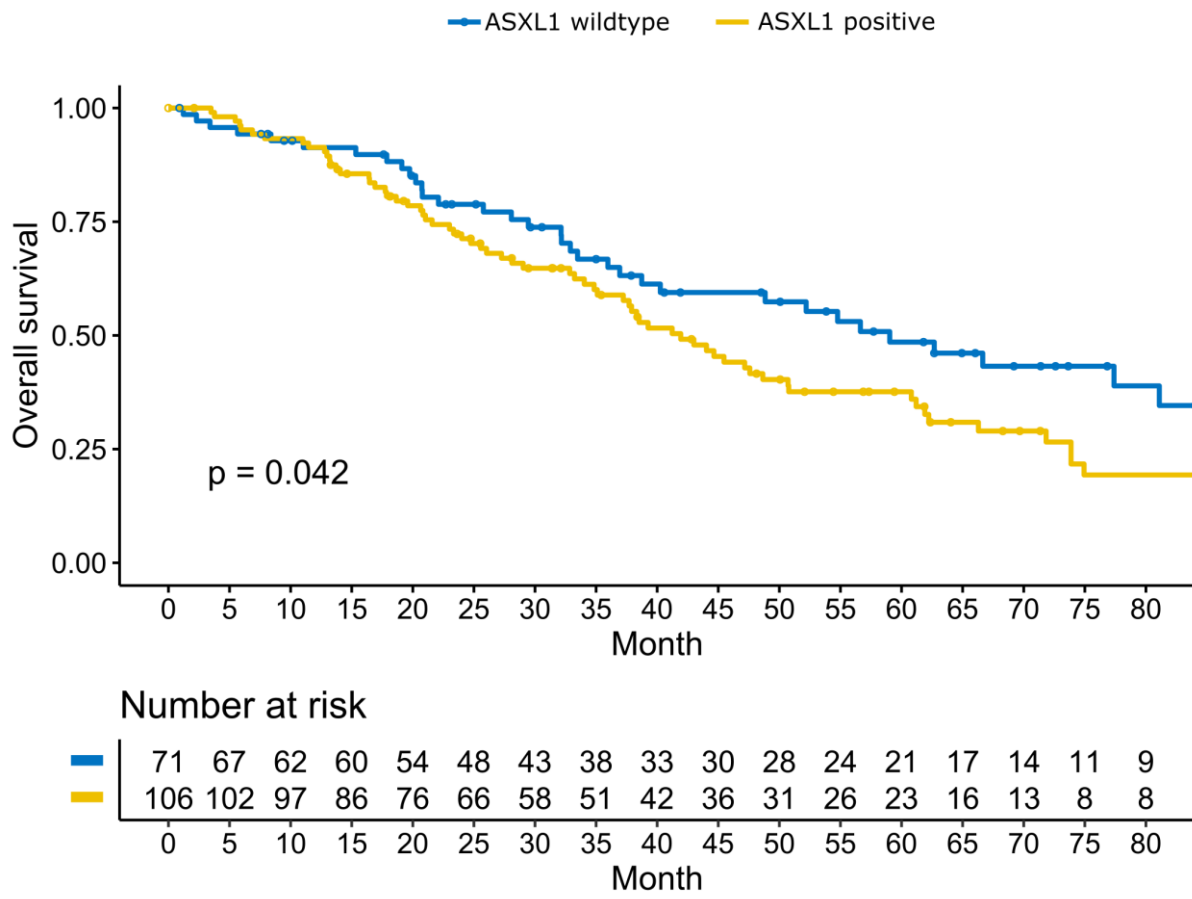

**Supplemental Figure 7:** Kaplan-Meier curves of overall survival according to the presence or the absence of *ASXL1* mutation in *TP53* or high-risk patients

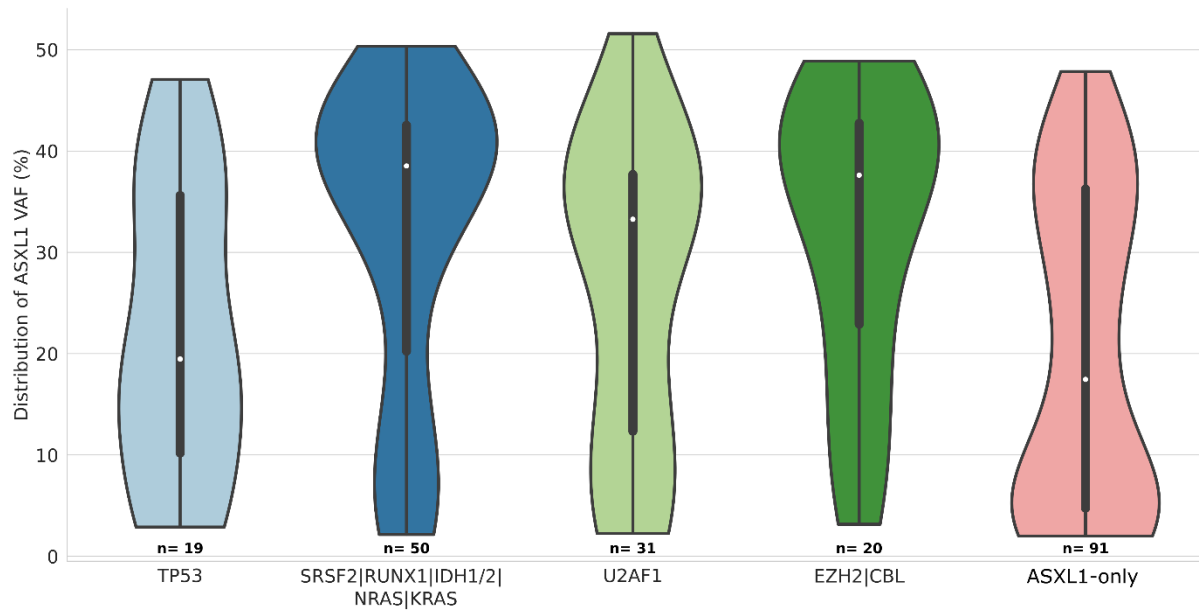

**Supplemental Figure 8:** Violin plots aims to described the allele burden of *ASXL1* mutation according to their association with other mutations of adverse prognosis or not (i.e. *ASXL1*-only group)

**A**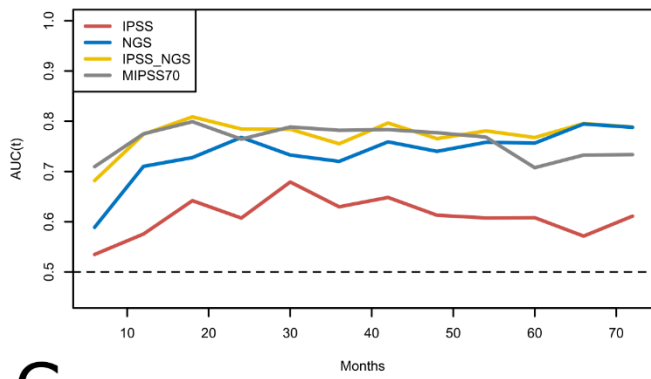**B**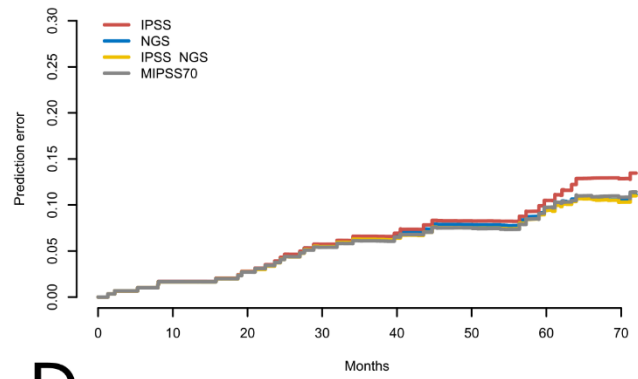**C**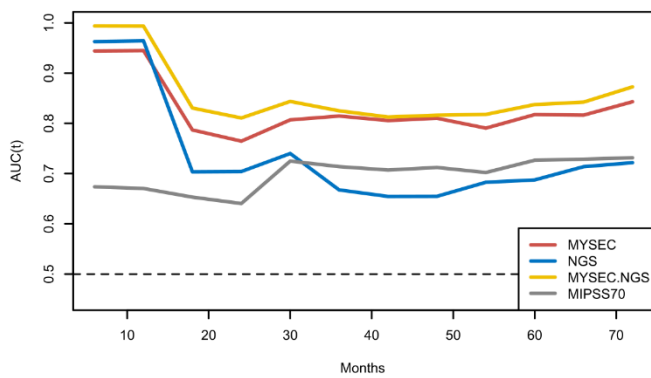**D**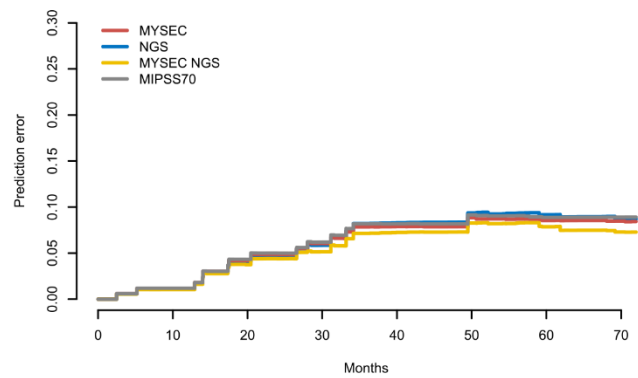

**Supplemental Figure 9:** The performance (time-AUC, panels A and C) and the accuracy (Brier score, panels B and D) for leukemic transformation prediction were measured over the time for usually prognosis scoring systems, the 4-tier genomic classification (NGS) alone or in combination for primary (A and B) and secondary (C and D) myelofibrosis patients.

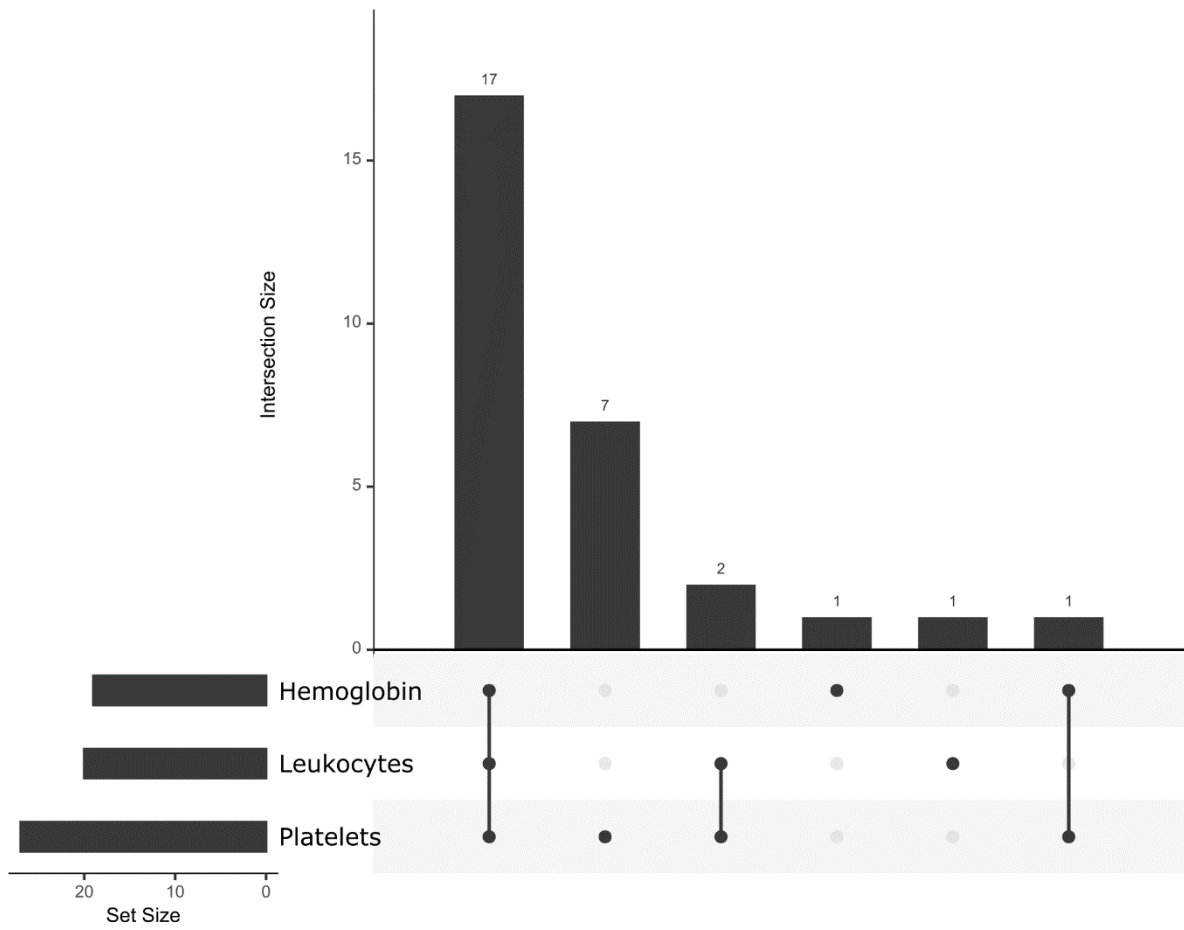

**Supplemental Figure 10:** Distribution and association of missing data in the cohort

## Supplemental Tables

**Supplemental Table 1:** Characteristics of the cohort

| Patient characteristics                              | Entire cohort (n=479)     | Primary myelofibrosis (n=305) | Secondary myelofibrosis (n=174) |
|------------------------------------------------------|---------------------------|-------------------------------|---------------------------------|
| Post-PV myelofibrosis (n)                            | -                         | -                             | 70                              |
| Post-ET myelofibrosis (n)                            | -                         | -                             | 104                             |
| Gender (M/F)                                         | 306/173                   | 216/89                        | 90/84                           |
| Age at diagnosis (year) [range]                      | 66 [18-89]                | 68 [18-88]                    | 67 [31-89]                      |
| Hemoglobin at diagnosis (g/dL) [range]               | 11.1 [6.2-18]             | 11.1 [6.3-17.2]               | 11.1 [6.2-18]                   |
| Platelets at diagnosis (10 <sup>9</sup> /L) [range]  | 272 [16-999]              | 250 [16-999]                  | 323 [19-980]                    |
| Leucocytes at diagnosis (10 <sup>9</sup> /L) [range] | 9.7 [1.3-76]              | 9.5 [1.7-76]                  | 9.8 [1.3-68]                    |
| Driver mutation n(%)                                 |                           |                               |                                 |
| <i>JAK2V617F</i>                                     | 309 (65%)                 | 187 (61%)                     | 122 (70%)                       |
| <i>CALR</i>                                          | 110 (23%)                 | 73 (24%)                      | 37 (21%)                        |
| <i>MPL</i>                                           | 25 (5%)                   | 19 (6%)                       | 6 (3%)                          |
| Double mutation                                      | 8 (2%)                    | 4 (1%)                        | 4 (2%)                          |
| Triple negative                                      | 27 (6%)                   | 22 (7%)                       | 5 (3%)                          |
| Lille Score n(%)                                     |                           |                               |                                 |
| Low risk                                             | -                         | 190 (62%)                     | -                               |
| Intermediate risk                                    | -                         | 90 (30%)                      | -                               |
| High risk                                            | -                         | 25 (8%)                       | -                               |
| IPSS classification n(%)                             |                           |                               |                                 |
| Low risk                                             | -                         | 53 (17%)                      | -                               |
| Intermediate-1 risk                                  | -                         | 104 (34%)                     | -                               |
| Intermediate-2 risk                                  | -                         | 89 (29%)                      | -                               |
| High risk                                            | -                         | 59 (19%)                      | -                               |
| MYSEC-PM classification n(%)                         |                           |                               |                                 |
| Low risk                                             | -                         | -                             | 36 (21%)                        |
| Intermediate-1 risk                                  | -                         | -                             | 74 (43%)                        |
| Intermediate-2 risk                                  | -                         | -                             | 41 (24%)                        |
| High risk                                            | -                         | -                             | 23 (13%)                        |
| MIPSS70 classification* n(%)                         |                           |                               |                                 |
| Low risk                                             | 51 (11%)                  | 30 (10%)                      | 21 (12%)                        |
| Intermediate risk                                    | 302 (63%)                 | 188 (62%)                     | 114 (64%)                       |
| High risk                                            | 126 (26%)                 | 87 (28%)                      | 39 (22%)                        |
| MIPSS70-plus-v2 classification* n(%)                 | <i>available in n=265</i> | <i>available in n=172</i>     | <i>available in n=93</i>        |
| Very low risk                                        | 12 (5%)                   | 10 (6%)                       | 2 (2%)                          |
| Low risk                                             | 61 (23%)                  | 36 (21%)                      | 25 (27%)                        |
| Intermediate risk                                    | 63 (24%)                  | 38 (22%)                      | 25 (27%)                        |
| High risk                                            | 109 (41%)                 | 78 (45%)                      | 31 (33%)                        |
| Very High risk                                       | 29 (8%)                   | 10 (6%)                       | 10 (11%)                        |
| Events                                               |                           |                               |                                 |
| Follow-up (median, years)                            | 4 [0.5-15]                | 4 [0.5-15]                    | 4 [2-13]                        |
| AML transformation n(%)                              | 56 (12%)                  | 39 (13%)                      | 17 (10%)                        |
| Deaths n(%)                                          | 194 (41%)                 | 130 (43%)                     | 64 (37%)                        |
| Allograft n(%)                                       | 50 (10%)                  | 35 (11%)                      | 15 (9%)                         |

PV: polycythemia Vera; ET: essential thrombocythemia; AML: acute myeloid leukemia

All values were reported as mean [range]; \*: MIPSS70 and MIPSS70+v2 were developed for primary myelofibrosis



**Supplemental Table 2:** Univariate analysis results for each transition of the multistate model

|                                             | Myelofibrosis to AML    |                   | Myelofibrosis to Death  |                   | AML to Death            |              |
|---------------------------------------------|-------------------------|-------------------|-------------------------|-------------------|-------------------------|--------------|
|                                             | HR [95%CI]              | p-value           | HR [95%CI]              | p-value           | HR [95%CI]              | p-value      |
| Age at diagnosis (y)                        | 1.01 [0.99-1.03]        | 0.362             | <b>1.06 [1.04-1.08]</b> | <b>&lt;0.0001</b> | 1.03 [1.00-1.06]        | 0.077        |
| Gender (Male)                               | 1.56 [0.88-2.77]        | 0.125             | <b>1.47 [1.04-2.08]</b> | <b>0.027</b>      | 1.24 [0.64-2.40]        | 0.52         |
| Hemoglobin (g/dL)                           | <b>0.85 [0.73-0.97]</b> | <b>0.018</b>      | <b>0.84 [0.77-0.91]</b> | <b>&lt;0.0001</b> | 0.96 [0.83-1.11]        | 0.60         |
| Leukocytes (10 <sup>9</sup> /L)             | 1.02 [0.99-1.05]        | 0.098             | <b>1.03 [1.02-1.04]</b> | <b>&lt;0.0001</b> | 1.01 [0.99-1.04]        | 0.39         |
| Platelets (10 <sup>9</sup> /L)              | <b>0.99 [0.99-0.99]</b> | <b>0.0006</b>     | 0.99 [0.99-0.99]        | 0.066             | 0.99 [0.99-1.00]        | 0.074        |
| Type of myelofibrosis (PMF)                 | 1.19 [0.68-2.12]        | 0.532             | 1.04 [0.74-1.46]        | 0.817             | 0.86 [0.45-1.67]        | 0.662        |
| Driver mutation ( <i>JAK2</i> as reference) |                         |                   |                         |                   |                         |              |
| <i>CALR</i>                                 | <b>0.26 [0.10-0.65]</b> | <b>0.004</b>      | <b>0.61 [0.40-0.92]</b> | <b>&lt;0.0001</b> | 1.08 [0.33-3.54]        | 0.91         |
| <i>MPL</i>                                  | 0.40 [0.10-1.65]        | 0.20              | 0.60 [0.28-1.29]        | 0.79              | 0.20 [0.03-1.48]        | 0.11         |
| Triple negative                             | 1.57 [0.62-3.97]        | 0.34              | 1.13 [0.57-2.24]        | 0.72              | 1.25 [0.38-4.10]        | 0.72         |
| Genomic ( <i>Others</i> as reference)       |                         |                   |                         |                   |                         |              |
| <i>TP53</i>                                 | <b>8.18 [3.30-20.3]</b> | <b>&lt;0.0001</b> | <b>4.10 [2.26-7.38]</b> | <b>&lt;0.0001</b> | <b>3.05 [1.12-8.31]</b> | <b>0.029</b> |
| High-risk                                   | <b>4.12 [2.16-7.87]</b> | <b>&lt;0.0001</b> | <b>2.63 [1.82-3.80]</b> | <b>&lt;0.0001</b> | 1.01 [0.47-2.18]        | 0.98         |
| <i>ASXL1</i> -only                          | 1.77 [0.75-4.18]        | 0.19              | 1.15 [0.68-1.93]        | 0.61              | 1.15 [0.41-3.18]        | 0.79         |

AML: acute myeloid leukemia

**Supplemental Table 3:** Sensitivity analysis of the multistage model for acute myeloid leukemia and death events considering the censor at the time of allograft

| Transitions<br>Variable                                              | Myelofibrosis to AML |         | Myelofibrosis to Death |         | AML to Death     |         |
|----------------------------------------------------------------------|----------------------|---------|------------------------|---------|------------------|---------|
|                                                                      | HR [95% CI]          | p-value | HR [95% CI]            | p-value | HR [95% CI]      | p-value |
| Age at diagnosis                                                     | .                    | .       | 1.07 [1.05-1.09]       | <0.0001 | .                | .       |
| Gender (Male)                                                        | .                    | .       | 1.36 [0.91-2.02]       | 0.129   | .                | .       |
| Hemoglobin                                                           | .                    | .       | 0.79 [0.72-0.88]       | <0.0001 | .                | .       |
| Leukocytes count                                                     | .                    | .       | 1.04 [1.02-1.05]       | <0.0001 | .                | .       |
| Platelets count                                                      | 0.99 [0.99-0.99]     | 0.004   | .                      | .       | .                | .       |
| <u>Driver mutation</u><br>( <i>JAK2</i> as reference)<br><i>CALR</i> | 0.24 [0.07-0.81]     | 0.021   | .                      | .       | .                | .       |
| <u>Genomic groups</u><br>(Others as reference)                       |                      |         |                        |         |                  |         |
| TP53                                                                 | 8.1 [3.1-21.2]       | <0.0001 | 2.73 [1.42-5.24]       | 0.0026  | 0.91 [0.23-3.73] | 0.920   |
| High-risk                                                            | 3.0 [1.45-6.21]      | 0.0032  | 1.70 [1.1-2.62]        | 0.017   | 0.64 [0.21-1.91] | 0.419   |
| ASXL1-only                                                           | 2.06 [0.76-5.56]     | 0.153   | 1.25 [0.71-2.19]       | 0.434   | 1.64 [0.34-7.90] | 0.536   |

AML: acute myeloid leukemia

**Supplemental Table 4:** Sensitivity analysis of the multistage model for acute myeloid leukemia and death events considering time zero as the time of sampling

| Transitions<br>Variable                                              | Myelofibrosis to AML |         | Myelofibrosis to Death |         | AML to Death     |         |
|----------------------------------------------------------------------|----------------------|---------|------------------------|---------|------------------|---------|
|                                                                      | HR [95% CI]          | p-value | HR [95% CI]            | p-value | HR [95% CI]      | p-value |
| Age at diagnosis                                                     | .                    | .       | 1.05 [1.03-1.07]       | <0.0001 | .                | .       |
| Gender (Male)                                                        | .                    | .       | 1.54 [1.05-2.24]       | 0.025   | .                | .       |
| Hemoglobin                                                           | .                    | .       | 0.82 [0.75-0.90]       | <0.0001 | .                | .       |
| Leukocytes count                                                     | .                    | .       | 1.03 [1.02-1.05]       | <0.0001 | .                | .       |
| Platelets count                                                      | 0.99 [0.99-0.99]     | 0.014   | .                      | .       | .                | .       |
| <u>Driver mutation</u><br>( <i>JAK2</i> as reference)<br><i>CALR</i> | 0.27 [0.08-0.89]     | 0.032   | .                      | .       | .                | .       |
| <u>Genomic groups</u><br>(Others as reference)                       |                      |         |                        |         |                  |         |
| TP53                                                                 | 13.2 [4.91-35.68]    | <0.0001 | 5.76 [3.07-10.78]      | <0.0001 | 1.47 [0.33-6.52] | 0.615   |
| High-risk                                                            | 3.76 [1.81-7.80]     | 0.0004  | 2.33 [1.54-3.52]       | <0.0001 | 0.67 [0.22-1.99] | 0.472   |
| ASXL1-only                                                           | 2.67 [1.04-6.87]     | 0.042   | 1.38 [0.80-2.38]       | 0.248   | 0.73 [0.18-2.97] | 0.656   |

AML: acute myeloid leukemia

**Supplemental Table 5:** Multistage model for acute myeloid leukemia and death events in the validation cohort of *Grinfeld et al.* (n=276)

| Transitions<br>Variable                                                           | Myelofibrosis to AML                                     |                           | Myelofibrosis to Death                                   |                         | AML to Death                                             |                         |
|-----------------------------------------------------------------------------------|----------------------------------------------------------|---------------------------|----------------------------------------------------------|-------------------------|----------------------------------------------------------|-------------------------|
|                                                                                   | HR [95% CI]                                              | p-value                   | HR [95% CI]                                              | p-value                 | HR [95% CI]                                              | p-value                 |
| Age at diagnosis                                                                  | .                                                        | .                         | 1.06 [1.04-1.08]                                         | <0.0001                 | .                                                        | .                       |
| Gender (Male)                                                                     | .                                                        | .                         | 2.50 [1.41-4.43]                                         | 0.002                   | .                                                        | .                       |
| Hemoglobin                                                                        | .                                                        | .                         | 0.90 [0.82-0.98]                                         | 0.025                   | .                                                        | .                       |
| Leukocytes count                                                                  | .                                                        | .                         | 1.02 [1.00-1.04]                                         | 0.007                   | .                                                        | .                       |
| Platelets count                                                                   | 0.99 [0.99-1.00]                                         | 0,087                     | .                                                        | .                       | .                                                        | .                       |
| <u>Driver mutation</u><br>( <i>JAK2</i> as reference)<br><i>CALR</i>              | 0.55 [0.16-1.90]                                         | 0.343                     | .                                                        | .                       | .                                                        | .                       |
| <u>Genomic groups</u><br>(Others as reference)<br>TP53<br>High-risk<br>ASXL1-only | 9.90 [3.28-29.9]<br>3.67 [1.49-9.00]<br>3.70 [0.78-17.5] | <0.0001<br>0.004<br>0.099 | 0.83 [0.25-2.76]<br>2.07 [1.24-3.46]<br>1.98 [0.85-4.61] | 0.764<br>0.005<br>0.112 | 0.40 [0.07-2.29]<br>0.39 [0.08-1.97]<br>1.02 [0.06-17.7] | 0.303<br>0.254<br>0.991 |

AML: acute myeloid leukemia

**Supplemental Table 6:** Sensitivity analysis of the multistage model for acute myeloid leukemia and death events considering only additional mutations above 15% of allele burden

| Transitions<br>Variable                                              | Myelofibrosis to AML |         | Myelofibrosis to Death |         | AML to Death     |         |
|----------------------------------------------------------------------|----------------------|---------|------------------------|---------|------------------|---------|
|                                                                      | HR [95% CI]          | p-value | HR [95% CI]            | p-value | HR [95% CI]      | p-value |
| Age at diagnosis                                                     | .                    | .       | 1.05 [1.03-1.07]       | <0.0001 | .                | .       |
| Gender (Male)                                                        | .                    | .       | 1.48 [1.01-2.16]       | 0,0426  | .                | .       |
| Hemoglobin                                                           | .                    | .       | 0.81 [0.74-0,89]       | <0.0001 | .                | .       |
| Leukocytes count                                                     | .                    | .       | 1.04 [1.02-1.05]       | <0.0001 | .                | .       |
| Platelets count                                                      | 0.99 [0.99-0.99]     | 0.0124  | .                      | .       | .                | .       |
| <u>Driver mutation</u><br>( <i>JAK2</i> as reference)<br><i>CALR</i> | 0.22 [0.07-0.73]     | 0.013   | .                      | .       | .                | .       |
| <u>Genomic groups</u><br>(Others as reference)                       |                      |         |                        |         |                  |         |
| TP53                                                                 | 5.83 [1.94-17.5]     | 0.0017  | 2.31 [1.13-4.71]       | 0.022   | 1.58 [0.30-8.44] | 0.593   |
| High-risk                                                            | 2.70 [1.41-5.15]     | 0.0026  | 1.54 [1.05-2.31]       | 0.034   | 0.85 [0.37-1.94] | 0.704   |
| ASXL1-only                                                           | 1.65 [0.61-4.43]     | 0.322   | 0.95 [0.51-1.77]       | 0.877   | 1.39 [0.38-5.06] | 0.614   |

AML: acute myeloid leukemia

**Supplemental Table 7:** Prognostic performance comparison for patients with a karyotype available (n=262)

Comparisons were performed between classical prognosis score systems and the 4-tier genomic classification (NGS) alone or in combination with a clinical score. C-index and AUC evaluated the performance of the model and Brier score reflected the accuracy of prediction (i.e. the rate of error). The best values were in bold.

| Overall survival             |              | C-Index     | Events at 24 months |           | Events at 48 months |           | Events at 72 months |           |
|------------------------------|--------------|-------------|---------------------|-----------|---------------------|-----------|---------------------|-----------|
|                              |              |             | Brier score         | AUC       | Brier score         | AUC       | Brier score         | AUC       |
| <b>MFP</b><br><b>(n=172)</b> | NGS          | 0.68        | 0.045               | 72        | 0.099               | 74        | 0.013               | 76        |
|                              | IPSS         | 0.66        | 0.047               | 70        | 0.102               | 73        | 0.129               | 73        |
|                              | MIPSS70+v2   | 0.69        | 0.046               | 74        | 0.1                 | 74        | 0.127               | 76        |
|                              | NGS-IPSS     | <b>0.74</b> | <b>0.045</b>        | <b>78</b> | <b>0.09</b>         | <b>82</b> | <b>0.111</b>        | <b>85</b> |
| <b>SMF</b><br><b>(n=93)</b>  | NGS          | 0.66        | 0.074               | 68        | 0.129               | 69        | 0.153               | 73        |
|                              | MYSEC-PM     | 0.69        | 0.083               | 78        | 0.126               | 74        | 0.145               | 74        |
|                              | MIPSS70+v2*  | 0.72        | 0.082               | 74        | 0.12                | <b>82</b> | 0.138               | 79        |
|                              | NGS-MYSEC-PM | <b>0.76</b> | <b>0.071</b>        | <b>83</b> | <b>0.113</b>        | 79        | <b>0.129</b>        | <b>84</b> |
| Leukemic transformation      |              | C-Index     | Events at 24 months |           | Events at 48 months |           | Events at 72 months |           |
|                              |              |             | Brier score         | AUC       | Brier score         | AUC       | Brier score         | AUC       |
| <b>MFP</b><br><b>(n=172)</b> | NGS          | 0.71        | <b>0.013</b>        | 85        | 0.038               | 73        | 0.062               | 75        |
|                              | IPSS         | 0.61        | 0.014               | 71        | 0.04                | 65        | 0.068               | 64        |
|                              | MIPSS70+v2   | <b>0.75</b> | 0.014               | 82        | 0.039               | 76        | 0.062               | 77        |
|                              | NGS-IPSS     | 0.73        | <b>0.013</b>        | <b>87</b> | <b>0.036</b>        | <b>76</b> | <b>0.06</b>         | <b>79</b> |

\* : MIPSS70+v2 was developed for primary myelofibrosis

Analysis not performed for leukemic transformation in SMF due to the lack of events (models did not converge)

**Supplemental Table 8:** Deciphering the prognosis of each gene in the high-risk group

The prognostic prediction of the high-risk group was evaluated by both integrated Brier score (0 to 72 months events) and C-index for overall survival. TP53 mutated patients were omitted of the analysis. The analysis was performed by leaving out one-by-one each gene of the high-risk group. A higher C-index and a lower Brier score reflect a better concordance probability and a better accuracy, respectively.

| Groups                            | Integrated Brier Score | C-Index      |
|-----------------------------------|------------------------|--------------|
| High risk (HR)                    | <b>0.131</b>           | <b>0.623</b> |
| HR with exclusion of <i>EZH2</i>  | 0.134                  | 0.608        |
| HR with exclusion of <i>CBL</i>   | <b>0.131</b>           | 0.622        |
| HR with exclusion of <i>U2AF1</i> | 0.135                  | 0.599        |
| HR with exclusion of <i>SRSF2</i> | 0.134                  | 0.606        |
| HR with exclusion of <i>IDH1</i>  | 0.132                  | 0.617        |
| HR with exclusion of <i>IDH2</i>  | 0.132                  | 0.619        |
| HR with exclusion of <i>NRAS</i>  | 0.132                  | 0.620        |
| HR with exclusion of <i>KRAS</i>  | <b>0.131</b>           | 0.621        |

**Supplemental Table 9:** Sensitivity analysis of the multistage model for acute myeloid leukemia and death events with omission of the *ASXL1* c.1934dupG mutation

| Transitions<br>Variable                                              | Myelofibrosis to AML |         | Myelofibrosis to Death |         | AML to Death     |         |
|----------------------------------------------------------------------|----------------------|---------|------------------------|---------|------------------|---------|
|                                                                      | HR [95% CI]          | p-value | HR [95% CI]            | p-value | HR [95% CI]      | p-value |
| Age at diagnosis                                                     | .                    | .       | 1.05 [1.03-1.07]       | <0.0001 | .                | .       |
| Gender (Male)                                                        | .                    | .       | 1.41 [0.97-2.07]       | 0.0743  | .                | .       |
| Hemoglobin                                                           | .                    | .       | 0.81 [0.74-0,89]       | <0.0001 | .                | .       |
| Leukocytes count                                                     | .                    | .       | 1.04 [1.02-1.05]       | <0.0001 | .                | .       |
| Platelets count                                                      | 0.99 [0.99-0.99]     | 0.004   | .                      | .       | .                | .       |
| <u>Driver mutation</u><br>( <i>JAK2</i> as reference)<br><i>CALR</i> | 0.21 [0.06-0.70]     | 0.011   | .                      | .       | .                | .       |
| <u>Genomic groups</u><br>(Others as reference)                       |                      |         |                        |         |                  |         |
| TP53                                                                 | 8.04 [3.16-20.46]    | <0.0001 | 3.00 [1.65-5.44]       | 0.0003  | 0.99 [0.26-3.77] | 0.990   |
| High-risk                                                            | 2.99 [1.51-5.93]     | 0.0016  | 1.75 [1.18-2.59]       | 0.0055  | 0.68 [0.27-1.72] | 0.416   |
| ASXL1-only                                                           | 2.58 [0.92-7.25]     | 0.073   | 1.20 [0.62-2.29]       | 0.583   | 0.59 [0.13-2.56] | 0.479   |

AML: acute myeloid leukemia



**Supplemental Table 10:** Sensitivity analysis of the multistage model for acute myeloid leukemia and death events dividing *ASXL1* mutation into c.1934dupG (dupG) and other mutations. The AML to death transition was not studied because the model didn't converge for it.

| Transitions<br>Variable                                              | Myelofibrosis to AML |         | Myelofibrosis to Death |         | AML to Death |         |
|----------------------------------------------------------------------|----------------------|---------|------------------------|---------|--------------|---------|
|                                                                      | HR [95% CI]          | p-value | HR [95% CI]            | p-value | HR [95% CI]  | p-value |
| Age at diagnosis                                                     | .                    | .       | 1.05 [1.03-1.07]       | <0.0001 |              |         |
| Gender (Male)                                                        | .                    | .       | 1.41 [0.96-2.06]       | 0.0767  |              |         |
| Hemoglobin                                                           | .                    | .       | 0.81 [0.74-0,89]       | <0.0001 |              |         |
| Leukocytes count                                                     | .                    | .       | 1.04 [1.02-1.05]       | <0.0001 |              |         |
| Platelets count                                                      | 0.99 [0.99-0.99]     | 0.0125  | .                      | .       |              |         |
| <u>Driver mutation</u><br>( <i>JAK2</i> as reference)<br><i>CALR</i> | 0.21 [0.06-0.69]     | 0.0102  | .                      | .       |              |         |
| <u>Genomic groups</u><br>(Others as reference)                       |                      |         |                        |         |              |         |
| TP53                                                                 | 8.67 [3.31-22.70]    | <0.0001 | 3.03 [1.65-5.55]       | 0.0003  |              |         |
| High-risk                                                            | 3.23 [1.57-6.62]     | 0.0014  | 1.77 [1.17-2.67]       | 0.0064  |              |         |
| ASXL1-dupG                                                           | 1.89 [0.42-8.52]     | 0.407   | 1.09 [0.49-2.47]       | 0.819   |              |         |
| ASXL1-others                                                         | 2.77 [0.96-7.99]     | 0.059   | 1.21 [0.63-2.33]       | 0.565   |              |         |

AML: acute myeloid leukemia

**Supplemental Table 11:** Comparison of characteristics between patient with at least one missing data and patients with no missing data

|                                                      | Patients with missing data (n=29) | Patients without missing data (n=450) | p-value |
|------------------------------------------------------|-----------------------------------|---------------------------------------|---------|
| Age at diagnosis (year) [range]                      | 66 [30-87]                        | 67 [18-89]                            | 0.218   |
| Gender (% of male)                                   | 69%                               | 64%                                   | 0.691   |
| Hemoglobin at diagnosis (g/dL) [range]               | 11.05 [7.6-14.6]                  | 11.1 [6.2-18]                         | 0.802   |
| Platelets at diagnosis (10 <sup>9</sup> /L) [range]  | 244 [217-271]                     | 273 [16-999]                          | 0.183   |
| Leucocytes at diagnosis (10 <sup>9</sup> /L) [range] | 9.6 [5.3-24.9]                    | 9.7 [1.3-76.1]                        | 0.783   |
| Driver mutation n(%)                                 |                                   |                                       |         |
| <i>JAK2V617F</i>                                     | 19 (66%)                          | 293 (65%)                             | 0.528   |
| <i>CALR</i>                                          | 9 (31%)                           | 104 (23%)                             |         |
| <i>MPL</i>                                           | 0                                 | 27 (6%)                               |         |
| Triple negative                                      | 1 (3%)                            | 26 (6%)                               |         |
| Genomic groups n(%)                                  |                                   |                                       |         |
| <i>TP53</i>                                          | 0                                 | 27 (6%)                               | 0.205   |
| High-risk                                            | 6 (21%)                           | 144 (32%)                             |         |
| <i>ASXL1-only</i>                                    | 7 (24%)                           | 67 (15%)                              |         |
| Others                                               | 16 (55%)                          | 212 (47%)                             |         |

All values were reported as mean [range]

## List of mutations in the whole cohort

‡: mutation found in a non-canonical transcript. For classification of mutations: A=Pathogenic, B=Likely Pathogenic and C=Variant of Unknown Significance

| PATIENT | DRIVER | DISEASE | GENE   | POSITION        | REFERENCE   | MUTATION   | TYPE MUTATION | PROTEIN CHANGE    | CLASSIF | VAF   |
|---------|--------|---------|--------|-----------------|-------------|------------|---------------|-------------------|---------|-------|
| 3       | CALR   | PMF     | CUX1   | chr7:101892102  | C           | G          | exonic        | p.A1444G          | C       | 50.88 |
| 3       | CALR   | PMF     | MAD1L1 | chr7:1855752    | A           | AGGAAGGCAG | exonic        | p.F703_L704insPAF | C       | 43.74 |
| 3       | CALR   | PMF     | TET2   | chr4:106197348  | C           | G          | exonic        | p.P1894R          | A       | 4.32  |
| 4       | JAK2   | SMF     | ZBTB33 | chrX:119388382  | T           | A          | exonic        | p.L371X           | A       | 87.67 |
| 4       | JAK2   | SMF     | CBL    | chr11:119149242 | C           | T          | exonic        | p.P417L           | A       | 7.21  |
| 4       | JAK2   | SMF     | CTCF   | chr16:67650719  | C           | A          | exonic        | p.R342S           | B       | 5.83  |
| 5       | MPL    | PMF     | MPL    | chr1:43818306   | T           | G          | exonic        | p.Y591D           | A       | 41.63 |
| 7       | CALR   | PMF     | ASXL1  | chr20:31022441  | A           | AG         | exonic        | p.G646Wfs*12      | A       | 14.69 |
| 7       | CALR   | PMF     | ASXL1  | chr20:31021586  | C           | T          | exonic        | p.Q529X           | A       | 2.9   |
| 7       | CALR   | PMF     | TP53   | chr17:7578426   | GT          | G          | exonic        | p.H168Pfs*1       | A       | 7.97  |
| 7       | CALR   | PMF     | TP53   | chr17:7579489   | CATTC       | CCG        | exonic        | p.R65Tfs*58       | A       | 9.1   |
| 8       | JAK2   | PMF     | TET2   | chr4:106157682  | CTTGCATCACA | C          | exonic        | p.L862Cfs*7       | A       | 40.97 |
| 8       | JAK2   | PMF     | ZRSR2  | chrX:15827443   | T           | A          | splicing      | .                 | B       | 96.84 |
| 9       | JAK2   | PMF     | ASXL1  | chr20:31021535  | C           | T          | exonic        | p.Q512X           | A       | 15.44 |
| 9       | JAK2   | PMF     | CBL    | chr11:119149004 | G           | T          | exonic        | p.W408C           | A       | 12.39 |
| 9       | JAK2   | PMF     | CBL    | chr11:119148991 | G           | A          | exonic        | p.C404Y           | A       | 4.93  |
| 9       | JAK2   | PMF     | GATA2  | chr3:128202807  | G           | A          | exonic        | p.L305F           | A       | 3.57  |
| 9       | JAK2   | PMF     | SH2B3  | chr12:111885607 | G           | A          | exonic        | p.V462M           | B       | 12.28 |
| 10      | JAK2   | PMF     | U2AF1  | chr21:44514777  | T           | C          | exonic        | p.Q157R           | A       | 45.49 |
| 12      | CALR   | SMF     |        |                 |             |            |               | .                 |         |       |
| 13      | JAK2   | PMF     | IDH2   | chr15:90631934  | C           | T          | exonic        | p.R140Q           | A       | 6.48  |
| 13      | JAK2   | PMF     | U2AF1  | chr21:44514777  | T           | G          | exonic        | p.Q157P           | A       | 38.64 |
| 16      | MPL    | PMF     | ASXL1  | chr20:31022441  | A           | AG         | exonic        | p.G646Wfs*12      | A       | 28.88 |
| 16      | MPL    | PMF     | ETNK1  | chr12:22811995  | A           | G          | exonic        | p.N244S           | A       | 34.86 |
| 16      | MPL    | PMF     | SRSF2  | chr17:74732959  | G           | A          | exonic        | p.P95L            | A       | 29.49 |
| 17      | CALR   | PMF     | KMT2A  | chr11:118377216 | A           | G          | exonic        | p.T3537A          | C       | 45.02 |
| 18      | CALR   | SMF     | ASXL1  | chr20:31022919  | GAGC        | G          | exonic        | p.Q803Gfs*14      | A       | 4.25  |
| 18      | CALR   | SMF     | ATM    | chr11:108121771 | T           | C          | exonic        | p.F527L           | C       | 53.77 |
| 18      | CALR   | SMF     | ATM    | chr11:108198443 | C           | A          | exonic        | p.C2349X          | A       | 19.65 |
| 18      | CALR   | SMF     | MPL    | chr1:43818303   | GACT        | G          | exonic        | p.Y591del         | B       | 3.74  |

|    |      |     |        |                 |                         |     |        |               |   |       |
|----|------|-----|--------|-----------------|-------------------------|-----|--------|---------------|---|-------|
| 18 | CALR | SMF | TET2   | chr4:106155649  | G                       | T   | exonic | p.E184X       | A | 42.27 |
| 20 | CALR | SMF | ATM    | chr11:108196143 | C                       | T   | exonic | p.R2227C      | C | 49.42 |
| 20 | CALR | SMF | NOTCH1 | chr9:139395297  | C                       | G   | exonic | p.G1881R      | B | 5.54  |
| 20 | CALR | SMF | ATM    | chr11:108114748 | A                       | G   | exonic | p.R189G       | B | 3.01  |
| 21 | MPL  | PMF | MPL    | chr1:43818310   | G                       | A   | exonic | p.R592Q       | A | 72.15 |
| 21 | MPL  | PMF | NFE2   | chr12:54687026  | A                       | AGC | exonic | p.L85Rfs*26   | A | 43.66 |
| 21 | MPL  | PMF | SRSF2  | chr17:74732959  | G                       | T   | exonic | p.P95H        | A | 46.86 |
| 21 | MPL  | PMF | TET2   | chr4:106164069  | TC                      | T   | exonic | p.P1194Lfs*31 | A | 47.63 |
| 22 | JAK2 | SMF | NFE2   | chr12:54686543  | G                       | A   | exonic | p.P246L       | C | 46.7  |
| 22 | JAK2 | SMF | STAG1  | chr3:136068200  | G                       | A   | exonic | p.S1024L      | C | 50.57 |
| 23 | CALR | PMF | ASXL1  | chr20:31022402  | TCACCACTGCCATAGAGAGCGGC | T   | exonic | p.E635Rfs*15  | A | 7.01  |
| 23 | CALR | PMF | ASXL1  | chr20:31023055  | C                       | CCA | exonic | p.P849Hfs*18  | A | 6.39  |
| 25 | CALR | SMF | JAK2   | chr9:5080678    | C                       | T   | exonic | p.T810I       | C | 45.04 |
| 26 | JAK2 | PMF | BCORL1 | chrX:129149581  | C                       | T   | exonic | p.R945X       | A | 16.08 |
| 26 | JAK2 | PMF | TET2   | chr4:106157824  | C                       | T   | exonic | p.Q909X       | A | 2.27  |
| 26 | JAK2 | PMF | NOTCH1 | chr9:139396511  | A                       | G   | exonic | p.L1805P      | C | 50.66 |
| 26 | JAK2 | PMF | PDS5B  | chr13:33349159  | G                       | A   | exonic | p.R1438Q      | C | 44.28 |
| 27 | JAK2 | SMF | SH2B3  | chr12:111885316 | G                       | T   | exonic | p.V402L       | B | 9.59  |
| 27 | JAK2 | SMF | TET2   | chr4:106156344  | TC                      | T   | exonic | p.P416Lfs*10  | A | 28.89 |
| 28 | JAK2 | PMF | ASXL1  | chr20:31022927  | A                       | AC  | exonic | p.T806Hfs*14  | A | 46.45 |
| 28 | JAK2 | PMF | CTCF   | chr16:67650714  | A                       | G   | exonic | p.H340R       | C | 44.58 |
| 28 | JAK2 | PMF | U2AF1  | chr21:44514777  | T                       | G   | exonic | p.Q157P       | A | 44.04 |
| 29 | JAK2 | PMF | NF1    | chr17:29665757  | C                       | A   | exonic | p.Y2285X      | A | 2.42  |
| 30 | JAK2 | SMF | ACD    | chr16:67692242  | T                       | C   | exonic | p.M371V       | C | 49.97 |
| 30 | JAK2 | SMF | ASXL1  | chr20:31022440  | G                       | GA  | exonic | p.G643Rfs*13  | A | 44.88 |
| 30 | JAK2 | SMF | KMT2C  | chr7:151970884  | A                       | C   | exonic | p.Y306X       | A | 4.5   |
| 33 | CALR | PMF | ASXL1  | chr20:31022628  | G                       | T   | exonic | p.E705X       | A | 39.09 |
| 33 | CALR | PMF | NRAS   | chr1:115258747  | C                       | T   | exonic | p.G12D        | A | 31.65 |
| 33 | CALR | PMF | U2AF1  | chr21:44514777  | T                       | C   | exonic | p.Q157R       | A | 13.14 |
| 34 | JAK2 | PMF | SH2B3  | chr12:111856105 | T                       | G   | exonic | p.H52Q        | A | 48.41 |
| 34 | JAK2 | PMF | BCOR   | chrX:39921558   | C                       | T   | exonic | p.R1421H      | C | 47.84 |
| 35 | JAK2 | PMF | TET2   | chr4:106193931  | C                       | T   | exonic | p.R1465X      | A | 49.3  |
| 38 | JAK2 | PMF | ATM    | chr11:108115524 | G                       | T   | exonic | p.K224N       | C | 41.47 |
| 41 | CALR | PMF | DNMT3A | chr2:25466779   | C                       | A   | exonic | p.G642X       | A | 44.27 |
| 41 | CALR | PMF | TET2   | chr4:106196349  | C                       | G   | exonic | p.S1561C      | C | 49.68 |
| 41 | CALR | PMF | TET2   | chr4:106193855  | A                       | AG  | exonic | p.R1440Afs*37 | A | 3.74  |

|    |      |     |        |                 |                           |         |          |                      |   |       |
|----|------|-----|--------|-----------------|---------------------------|---------|----------|----------------------|---|-------|
| 41 | CALR | PMF | WT1    | chr11:32456321  | C                         | T       | exonic   | p.G191S              | C | 47.2  |
| 42 | CALR | SMF | ASXL1  | chr20:31022437  | TCGGAG                    | T       | exonic   | p.I641Mfs*13         | A | 43.04 |
| 42 | CALR | SMF | PPM1D  | chr17:58740374  | TG                        | T       | exonic   | p.W427Cfs*3          | A | 8.53  |
| 42 | CALR | SMF | PPM1D  | chr17:58740375  | G                         | A       | exonic   | p.W427X              | A | 5.01  |
| 42 | CALR | SMF | PPM1D  | chr17:58740488  | G                         | GT      | exonic   | p.I466Hfs*9          | A | 2.21  |
| 42 | CALR | SMF | PPM1D  | chr17:58740649  | TG                        | T       | exonic   | p.G519Afs*2          | A | 4.14  |
| 42 | CALR | SMF | PPM1D  | chr17:58740536  | GC                        | G       | exonic   | p.L482fs*            | A | 3.53  |
| 42 | CALR | SMF | TP53   | chr17:7577108   | C                         | T       | exonic   | p.C277Y              | A | 2.14  |
| 44 | CALR | SMF | ACD    | chr16:67692659  | T                         | A       | exonic   | p.I322F              | C | 49.28 |
| 44 | CALR | SMF | ASXL1  | chr20:31022877  | GA                        | G       | exonic   | p.E788Dfs*29         | A | 39.02 |
| 44 | CALR | SMF | ATM    | chr11:108153536 | G                         | C       | exonic   | p.D1226H             | B | 38.09 |
| 44 | CALR | SMF | EZH2   | chr7:148526858  | A                         | G       | exonic   | p.L149P              | A | 38.28 |
| 44 | CALR | SMF | RUNX1  | chr21:36171637  | T                         | G       | exonic   | p.M310L              | C | 50.2  |
| 45 | JAK2 | PMF | ASXL1  | chr20:31022441  | A                         | AG      | exonic   | p.G646Wfs*12         | A | 36.21 |
| 45 | JAK2 | PMF | NF1    | chr17:29684109  | G                         | A       | splicing | .                    | B | 39.36 |
| 45 | JAK2 | PMF | U2AF1  | chr21:44514769  | T                         | TCTCATA | exonic   | p.E159_M160insYE     | B | 36.91 |
| 46 | JAK2 | SMF | ATM    | chr11:108200963 | G                         | C       | exonic   | p.E2444Q             | C | 39.9  |
| 46 | JAK2 | SMF | NOTCH1 | chr9:139409811  | G                         | T       | exonic   | p.P649T              | C | 47.73 |
| 46 | JAK2 | SMF | NRAS   | chr1:115258747  | C                         | T       | exonic   | p.G12D               | A | 43.32 |
| 50 | JAK2 | SMF | PPM1D  | chr17:58740376  | G                         | A       | exonic   | p.W427X              | A | 3.08  |
| 51 | CALR | PMF |        |                 |                           |         |          | .                    |   |       |
| 56 | JAK2 | SMF |        |                 |                           |         |          | .                    |   |       |
| 58 | JAK2 | PMF | SF3B1  | chr2:198267361  | T                         | G       | exonic   | p.K666Q              | A | 28.6  |
| 58 | JAK2 | PMF | ATM    | chr11:108151840 | T                         | C       | exonic   | p.F1174S             | C | 50.02 |
| 59 | JAK2 | SMF | ASXL1  | chr20:31023267  | C                         | T       | exonic   | p.H918Y              | C | 48.93 |
| 60 | CALR | PMF | TP53   | chr17:7578208   | T                         | C       | exonic   | p.H214R              | A | 46.33 |
| 61 | JAK2 | PMF | SETBP1 | chr18:42531917  | T                         | C       | exonic   | p.I871T              | A | 97.5  |
| 61 | JAK2 | PMF | ASXL1  | chr20:31022402  | TCACCACTGCCATAGAGAGGCCGGC | T       | exonic   | p.E635Rfs*15         | A | 34.6  |
| 62 | CALR | PMF | CSF3R  | chr1:36939086   | G                         | A       | exonic   | p.A208V              | B | 3.05  |
| 62 | CALR | PMF | TET2   | chr4:106193801  | CA                        | C       | exonic   | p.V1423Sfs*24        | A | 21.66 |
| 62 | CALR | PMF | TET2   | chr4:106196829  | T                         | A,G     | exonic   | p.L1721X             | A | 3.81  |
| 63 | TN   | PMF | ATM    | chr11:108098419 | G                         | A       | exonic   | p.R23Q               | C | 48.7  |
| 63 | TN   | PMF | ATM    | chr11:108216623 | ACTTCTTCTATTGGTAAT        | A       | exonic   | p.T2858_V2862delinsI | B | 2.99  |
| 65 | CALR | PMF | TET2   | chr4:106180773  | CAGG                      | C       | exonic   | p.R1269Efs*93        | A | 8.47  |
| 65 | CALR | PMF | TET2   | chr4:106196267  | C                         | T       | exonic   | p.Q1534X             | A | 34.9  |
| 65 | CALR | PMF | EZH2   | chr7:148506403  | T                         | G       | exonic   | p.K703N              | B | 11.74 |

|    |      |     |        |                 |       |    |        |                      |   |       |
|----|------|-----|--------|-----------------|-------|----|--------|----------------------|---|-------|
| 65 | CALR | PMF | EZH2   | chr7:148507485  | C     | G  | exonic | p.D657H              | A | 22.83 |
| 65 | CALR | PMF | ASXL1  | chr20:31022441  | A     | AG | exonic | p.G646Wfs*12         | A | 38.47 |
| 66 | CALR | SMF |        |                 |       |    |        | .                    |   |       |
| 67 | JAK2 | PMF | ASXL1  | chr20:31021250  | C     | T  | exonic | p.R417X              | A | 47.24 |
| 67 | JAK2 | PMF | CBL    | chr11:119148974 | C     | A  | exonic | p.H398Q              | A | 3.55  |
| 67 | JAK2 | PMF | ETNK1  | chr12:22811995  | A     | G  | exonic | p.N244S              | A | 45.43 |
| 67 | JAK2 | PMF | EZH2   | chr7:148526910  | G     | GA | exonic | p.P132Sfs*5          | A | 92.68 |
| 68 | MPL  | SMF | TET2   | chr4:106157613  | AC    | A  | exonic | p.H839Tfs*1          | A | 15.75 |
| 68 | MPL  | SMF | TET2   | chr4:106193939  | G     | GA | exonic | p.L1469Tfs*8         | A | 10.53 |
| 69 | JAK2 | PMF | NOTCH1 | chr9:139391016  | A     | G  | exonic | p.M2392T             | C | 48.02 |
| 69 | JAK2 | PMF | NFE2   | chr12:54686997  | G     | A  | exonic | p.P95S               | C | 50.79 |
| 70 | JAK2 | SMF | KMT2C  | chr7:151949068  | C     | T  | exonic | p.R526H              | C | 50.06 |
| 70 | JAK2 | SMF | NFE2   | chr12:54686654  | G     | C  | exonic | p.S209X              | A | 34.92 |
| 71 | JAK2 | PMF | TET2   | chr4:106156589  | CT    | C  | exonic | p.V498Ffs*34         | A | 3.05  |
| 71 | JAK2 | PMF | SF3B1  | chr2:198267358  | TC    | AA | exonic | p.K666_I667delinsNF  | A | 33.61 |
| 72 | TN   | PMF | FBXW7  | chr4:153273648  | C     | T  | exonic | p.R286Q <sup>†</sup> | C | 49.86 |
| 72 | TN   | PMF | FLT3   | chr13:28578284  | A     | C  | exonic | p.S963A              | C | 45.09 |
| 72 | TN   | PMF | GATA2  | chr3:128199947  | AG    | A  | exonic | p.L453Cfs*23         | A | 44.37 |
| 72 | TN   | PMF | GNAS   | chr20:57484421  | G     | A  | exonic | p.R844H              | A | 45.0  |
| 72 | TN   | PMF | SH2B3  | chr12:111885958 | AC    | A  | exonic | p.L528Wfs*18         | A | 43.12 |
| 72 | TN   | PMF | SRSF2  | chr17:74732960  | G     | T  | exonic | p.P95T               | A | 40.85 |
| 75 | TN   | PMF | RAD21  | chr8:117878915  | C     | T  | exonic | p.W18X               | A | 43.56 |
| 75 | TN   | PMF | SH2B3  | chr12:111885473 | C     | A  | exonic | p.S417X              | A | 10.03 |
| 76 | JAK2 | SMF |        |                 |       |    |        | .                    |   |       |
| 77 | CALR | SMF | NFE2   | chr12:54686494  | GCTCT | G  | exonic | p.E261Afs*2          | A | 5.67  |
| 78 | JAK2 | PMF | SF3B1  | chr2:198267359  | C     | G  | exonic | p.K666N              | A | 48.87 |
| 79 | JAK2 | PMF | CUX1   | chr7:101559470  | G     | A  | exonic | p.E47K               | C | 48.71 |
| 81 | CALR | PMF |        |                 |       |    |        | .                    |   |       |
| 83 | JAK2 | PMF | DDX41  | chr5:176940693  | TAGG  | T  | exonic | p.S363del            | A | 48.77 |
| 83 | JAK2 | PMF | CUX1   | chr7:101891909  | C     | G  | exonic | p.P1380A             | C | 47.52 |
| 83 | JAK2 | PMF | SRSF2  | chr17:74732959  | G     | T  | exonic | p.P95H               | A | 24.91 |
| 84 | CALR | SMF | TET2   | chr4:106190828  | C     | T  | exonic | p.S1369L             | C | 42.04 |
| 85 | JAK2 | PMF |        |                 |       |    |        | .                    |   |       |
| 86 | MPL  | PMF | ASXL1  | chr20:31023159  | CA    | C  | exonic | p.E883Kfs*2          | A | 36.92 |
| 86 | MPL  | PMF | ASXL1  | chr20:31023383  | T     | TA | exonic | p.T957Nfs*12         | A | 2.83  |
| 86 | MPL  | PMF | SRSF2  | chr17:74732251  | A     | C  | exonic | p.S220A              | B | 2.8   |

|     |      |     |        |                |       |    |          |               |   |       |
|-----|------|-----|--------|----------------|-------|----|----------|---------------|---|-------|
| 86  | MPL  | PMF | TET2   | chr4:106190815 | G     | A  | exonic   | p.G1365S      | B | 36.92 |
| 87  | JAK2 | SMF | NFE2   | chr12:54686494 | GCTCT | G  | exonic   | p.E261Afs*2   | A | 41.1  |
| 87  | JAK2 | SMF | TET2   | chr4:106156090 | AT    | A  | exonic   | p.I331Nfs*15  | A | 15.32 |
| 87  | JAK2 | SMF | TET2   | chr4:106196819 | G     | T  | exonic   | p.V1718L      | A | 52.14 |
| 87  | JAK2 | SMF | ZBTB33 | chrX:119388805 | A     | G  | exonic   | p.H512R       | B | 3.88  |
| 88  | JAK2 | PMF |        |                |       |    |          | .             |   |       |
| 89  | JAK2 | SMF |        |                |       |    |          | .             |   |       |
| 90  | CALR | PMF | ATRX   | chrX:76938572  | C     | G  | exonic   | p.D726H       | C | 100.0 |
| 90  | CALR | PMF | ZBTB33 | chrX:119387754 | A     | G  | exonic   | p.T162A       | C | 100.0 |
| 91  | MPL  | SMF | TET2   | chr4:106157053 | C     | T  | exonic   | p.Q652X       | A | 3.33  |
| 92  | JAK2 | SMF |        |                |       |    |          | .             |   |       |
| 93  | JAK2 | SMF |        |                |       |    |          | .             |   |       |
| 94  | CALR | SMF | EZH2   | chr7:148516722 | T     | C  | exonic   | p.N322S       | A | 55.16 |
| 94  | CALR | SMF | TET2   | chr4:106164897 | C     | G  | exonic   | p.Y1255X      | A | 40.66 |
| 95  | CALR | SMF | ASXL1  | chr20:31022398 | G     | GA | exonic   | p.G629Rfs*5   | A | 42.53 |
| 95  | CALR | SMF | GNAS   | chr20:57484420 | C     | T  | exonic   | p.R844C       | B | 3.65  |
| 95  | CALR | SMF | NF1    | chr17:29556079 | C     | T  | exonic   | p.R816X       | A | 42.29 |
| 95  | CALR | SMF | ZRSR2  | chrX:15821848  | A     | T  | exonic   | p.K81X        | A | 24.56 |
| 95  | CALR | SMF | ZRSR2  | chrX:15833949  | TC    | T  | exonic   | p.L237fs*     | A | 22.47 |
| 96  | CALR | SMF | ASXL1  | chr20:31023000 | C     | T  | exonic   | p.Q829X       | A | 2.03  |
| 96  | CALR | SMF | CUX1   | chr7:101892179 | C     | T  | exonic   | p.L1470F      | C | 47.07 |
| 96  | CALR | SMF | DNMT3A | chr2:25462085  | C     | G  | splicing | .             | C | 43.24 |
| 96  | CALR | SMF | KMT2D  | chr12:49425138 | CAGG  | C  | exonic   | p.L4451del    | C | 47.51 |
| 96  | CALR | SMF | NF1    | chr17:29579963 | G     | C  | exonic   | p.C1373S      | C | 45.54 |
| 96  | CALR | SMF | TET2   | chr4:106193849 | G     | GA | exonic   | p.R1440Tfs*37 | A | 40.88 |
| 97  | CALR | PMF | ASXL1  | chr20:31023408 | C     | T  | exonic   | p.R965X       | A | 8.9   |
| 97  | CALR | PMF | ASXL1  | chr20:31022592 | C     | T  | exonic   | p.R693X       | A | 2.0   |
| 97  | CALR | PMF | KMT2D  | chr12:49441794 | C     | T  | exonic   | p.C1397Y      | B | 26.29 |
| 97  | CALR | PMF | TET2   | chr4:106157002 | C     | T  | exonic   | p.Q635X       | A | 42.7  |
| 98  | JAK2 | PMF | EZH2   | chr7:148514996 | T     | A  | exonic   | p.K405X       | A | 8.58  |
| 98  | JAK2 | PMF | KMT2C  | chr7:151864358 | G     | C  | exonic   | p.S3208C      | C | 46.75 |
| 98  | JAK2 | PMF | TET2   | chr4:106158503 | G     | A  | exonic   | p.C1135Y      | A | 3.07  |
| 99  | JAK2 | SMF | NFE2   | chr12:54686463 | G     | A  | exonic   | p.R273W       | C | 40.59 |
| 99  | JAK2 | SMF | JAK2   | chr9:5081738   | A     | T  | exonic   | p.L816F       | B | 2.04  |
| 100 | CALR | PMF | ASXL1  | chr20:31022441 | A     | AG | exonic   | p.G646Wfs*12  | A | 31.0  |
| 100 | CALR | PMF | MAD1L1 | chr7:1937984   | C     | T  | exonic   | p.R617Q       | C | 48.26 |

|     |      |     |        |                 |                                   |     |          |                    |   |       |
|-----|------|-----|--------|-----------------|-----------------------------------|-----|----------|--------------------|---|-------|
| 101 | JAK2 | PMF | CUX1   | chr7:101845221  | T                                 | C   | exonic   | p.W893R            | C | 50.94 |
| 101 | JAK2 | PMF | KDM6A  | chrX:44922745   | A                                 | C   | exonic   | p.N536H            | C | 48.62 |
| 101 | JAK2 | PMF | U2AF1  | chr21:44514777  | T                                 | G   | exonic   | p.Q157P            | A | 42.11 |
| 101 | JAK2 | PMF | ZBTB33 | chrX:119388689  | C                                 | G   | exonic   | p.N473K            | C | 50.45 |
| 102 | JAK2 | PMF | TET2   | chr4:106156227  | GA                                | G   | exonic   | p.N377Mfs*49       | A | 45.3  |
| 102 | JAK2 | PMF | ZRSR2  | chrX:15841000   | G                                 | T   | exonic   | p.E362X            | A | 89.17 |
| 102 | JAK2 | PMF | KMT2C  | chr7:151856132  | C                                 | T   | exonic   | p.G3829D           | C | 50.49 |
| 102 | JAK2 | PMF | KMT2C  | chr7:151949698  | G                                 | C   | exonic   | p.P468A            | C | 42.61 |
| 105 | CALR | PMF | ASXL1  | chr20:31024636  | T                                 | TG  | exonic   | p.P1377Sfs*2       | A | 5.3   |
| 105 | CALR | PMF | SUZ12  | chr17:30322701  | TTACCTC                           | T   | exonic   | p.L572_L574delinsF | B | 6.42  |
| 105 | CALR | PMF | TET2   | chr4:106155736  | G                                 | GT  | exonic   | p.S214Ffs*10       | A | 37.94 |
| 106 | JAK2 | PMF | CTCF   | chr16:67654681  | G                                 | A   | exonic   | p.D390N            | A | 28.97 |
| 106 | JAK2 | PMF | DNMT3A | chr2:25457242   | C                                 | T   | exonic   | p.R882H            | A | 45.22 |
| 106 | JAK2 | PMF | U2AF1  | chr21:44514777  | T                                 | C   | exonic   | p.Q157R            | A | 42.54 |
| 107 | CALR | PMF | ATM    | chr11:108206648 | C                                 | T   | exonic   | p.T2743M           | C | 48.82 |
| 107 | CALR | PMF | RUNX1  | chr21:36252925  | T                                 | C   | exonic   | p.N146S            | B | 2.94  |
| 108 | JAK2 | SMF | CUX1   | chr7:101882866  | T                                 | G   | splicing | .                  | B | 34.29 |
| 110 | JAK2 | PMF | KMT2B  | chr19:36212438  | G                                 | A   | exonic   | p.G730E            | C | 46.4  |
| 111 | JAK2 | SMF | ASXL1  | chr20:31022653  | TG                                | T   | exonic   | p.M713lfs*11       | A | 14.2  |
| 111 | JAK2 | SMF | BCORL1 | chrX:129147377  | CG                                | C   | exonic   | p.A211Pfs*41       | A | 14.77 |
| 111 | JAK2 | SMF | BCORL1 | chrX:129150062  | G                                 | A   | exonic   | p.W1105X           | A | 4.17  |
| 111 | JAK2 | SMF | DNMT3A | chr2:25469573   | CG                                | C   | exonic   | p.V399Wfs*7        | A | 2.46  |
| 111 | JAK2 | SMF | ETNK1  | chr12:22778318  | TCGCCGTCGCCGTCGTCGGTGG<br>TAGTCTC | T   | exonic   | p.V78_A87del       | A | 31.84 |
| 111 | JAK2 | SMF | KRAS   | chr12:25380279  | C                                 | A   | exonic   | p.G60V             | A | 11.99 |
| 111 | JAK2 | SMF | PHF6   | chrX:133547979  | G                                 | C   | exonic   | p.A238P            | A | 7.1   |
| 111 | JAK2 | SMF | TET2   | chr4:106180835  | G                                 | A   | exonic   | p.G1288D           | A | 24.05 |
| 111 | JAK2 | SMF | TET2   | chr4:106182930  | G                                 | GTC | exonic   | p.H1325Lfs*38      | A | 14.1  |
| 112 | JAK2 | PMF | ASXL1  | chr20:31023045  | AC                                | A   | exonic   | p.S846Vfs*20       | A | 25.22 |
| 112 | JAK2 | PMF | DNMT3A | chr2:25457243   | G                                 | A   | exonic   | p.R882C            | A | 46.82 |
| 112 | JAK2 | PMF | KMT2C  | chr7:151878166  | G                                 | C   | exonic   | p.A2260G           | C | 49.88 |
| 112 | JAK2 | PMF | TET2   | chr4:106193734  | CT                                | C   | exonic   | p.R1400Efs*47      | A | 14.18 |
| 114 | JAK2 | PMF | ASXL1  | chr20:31023527  | CT                                | C   | exonic   | p.F1005Lfs*18      | A | 41.15 |
| 114 | JAK2 | PMF | TET2   | chr4:106196614  | T                                 | G   | exonic   | p.Y1649X           | A | 3.32  |
| 115 | JAK2 | PMF | CBL    | chr11:119156046 | G                                 | A   | exonic   | p.D571N            | C | 46.8  |
| 115 | JAK2 | PMF | SF3B1  | chr2:198266834  | T                                 | C   | exonic   | p.K700E            | A | 36.98 |



|     |      |     |        |                 |                          |              |          |                           |   |       |
|-----|------|-----|--------|-----------------|--------------------------|--------------|----------|---------------------------|---|-------|
| 115 | JAK2 | PMF | TET2   | chr4:106157888  | TGC                      | T            | exonic   | p.P931fs*                 | A | 38.14 |
| 116 | JAK2 | SMF | NOTCH1 | chr9:139391512  | G                        | A            | exonic   | p.P2227S                  | C | 48.88 |
| 118 | CALR | SMF | KMT2C  | chr7:151945696  | T                        | C            | exonic   | p.Q608R                   | C | 40.26 |
| 119 | JAK2 | PMF | SF3B1  | chr2:198267359  | C                        | A            | exonic   | p.K666N                   | A | 45.74 |
| 119 | JAK2 | PMF | TET2   | chr4:106164727  | G                        | T            | exonic   | p.V1199L                  | B | 21.76 |
| 119 | JAK2 | PMF | TET2   | chr4:106190798  | G                        | A            | exonic   | p.R1359H                  | A | 48.63 |
| 125 | MPL  | PMF | ASXL1  | chr20:31022441  | A                        | AG           | exonic   | p.G646Wfs*12              | A | 25.05 |
| 125 | MPL  | PMF | SH2B3  | chr12:111885180 | C                        | A            | exonic   | p.D356E                   | C | 46.21 |
| 126 | TN   | SMF |        |                 |                          |              |          | .                         |   |       |
| 140 | CALR | PMF |        |                 |                          |              |          | .                         |   |       |
| 141 | JAK2 | PMF | ASXL1  | chr20:31022768  | T                        | TG           | exonic   | p.A752Gfs*21              | A | 23.2  |
| 141 | JAK2 | PMF | DNMT3A | chr2:25464429   | A                        | G            | splicing | .                         | B | 2.79  |
| 141 | JAK2 | PMF | JAK2   | chr9:5055751    | G                        | A            | exonic   | p.R340Q                   | C | 50.99 |
| 141 | JAK2 | PMF | TET2   | chr4:106164830  | G                        | C            | exonic   | p.W1233S                  | B | 29.63 |
| 142 | JAK2 | SMF | DNMT3A | chr2:25457168   | C                        | CG           | exonic   | p.E907Rfs*13              | A | 18.4  |
| 142 | JAK2 | SMF | DOT1L  | chr19:2223448   | G                        | A            | exonic   | p.E1187K                  | C | 47.84 |
| 142 | JAK2 | SMF | EZH2   | chr7:148504761  | C                        | T            | exonic   | p.E745K                   | A | 3.4   |
| 142 | JAK2 | SMF | MAD1L1 | chr7:1976334    | T                        | C            | exonic   | p.K599R                   | C | 49.6  |
| 142 | JAK2 | SMF | SUZ12  | chr17:30325775  | T                        | G            | exonic   | p.L658R                   | B | 5.53  |
| 143 | CALR | SMF | SF3B1  | chr2:198267359  | C                        | A            | exonic   | p.K666N                   | A | 6.03  |
| 144 | CALR | SMF | ASXL1  | chr20:31023130  | G                        | ins67        | exonic   | p.C872_R1541delins18      | A | 9.93  |
| 158 | JAK2 | PMF | SRSF2  | chr17:74732959  | G                        | C            | exonic   | p.P95R                    | A | 51.33 |
| 159 | JAK2 | PMF | ASXL1  | chr20:31022441  | A                        | AG           | exonic   | p.G646Wfs*12              | A | 34.44 |
| 159 | JAK2 | PMF | CBL    | chr11:119148991 | G                        | A            | exonic   | p.C404Y                   | A | 89.9  |
| 159 | JAK2 | PMF | EZH2   | chr7:148507434  | A                        | C            | exonic   | p.L674V                   | A | 91.22 |
| 159 | JAK2 | PMF | RUNX1  | chr21:36259210  | C                        | T            | exonic   | p.S94N                    | C | 46.43 |
| 160 | JAK2 | PMF | ASXL1  | chr20:31022441  | A                        | AG           | exonic   | p.G646Wfs*12              | A | 38.0  |
| 160 | JAK2 | PMF | JAK2   | chr9:5054604    | A                        | C            | exonic   | p.Q219P                   | B | 3.3   |
| 161 | TN   | PMF | MPL    | chr1:43814957   | C                        | CTGGTGCTCTGG | exonic   | p.L498_L500insLVLLVL<br>L | A | 38.57 |
| 162 | CALR | SMF | ASXL1  | chr20:31021472  | C                        | T            | exonic   | p.Q491X                   | A | 37.33 |
| 162 | CALR | SMF | ASXL1  | chr20:31022402  | TCACCACTGCCATAGAGAGGCGGC | T            | exonic   | p.E635Rfs*15              | A | 3.62  |
| 162 | CALR | SMF | TET2   | chr4:106196324  | C                        | T            | exonic   | p.Q1553X                  | A | 2.24  |
| 162 | CALR | SMF | CTCF   | chr16:67670643  | G                        | A            | exonic   | p.V630I                   | C | 50.24 |
| 163 | TN   | PMF | SH2B3  | chr12:111885330 | CTT                      | C            | exonic   | p.F407Sfs*46              | A | 85.14 |
| 163 | TN   | PMF | TET2   | chr4:106197324  | TAAAGAATCCC              | T            | exonic   | p.K1887fs*17              | A | 38.25 |

|     |      |     |        |                 |     |      |          |                   |   |       |
|-----|------|-----|--------|-----------------|-----|------|----------|-------------------|---|-------|
| 164 | JAK2 | SMF | ZRSR2  | chrX:15836735   | T   | C    | exonic   | p.L266P           | B | 10.15 |
| 164 | JAK2 | SMF | SRSF2  | chr17:74733073  | A   | T    | exonic   | p.F57Y            | B | 5.58  |
| 165 | JAK2 | PMF | PPM1D  | chr17:58740819  | C   | CT   | exonic   | p.V576fs*         | A | 42.02 |
| 165 | JAK2 | PMF | ASXL1  | chr20:31022795  | GGC | G    | exonic   | p.A761Lfs*11      | A | 39.3  |
| 165 | JAK2 | PMF | TET2   | chr4:106162577  | T   | G    | exonic   | p.M1164R          | B | 12.84 |
| 167 | JAK2 | SMF | ABL1   | chr9:133760418  | C   | T    | exonic   | p.P933L           | C | 50.16 |
| 167 | JAK2 | SMF | CUX1   | chr7:101755049  | A   | G    | exonic   | p.Q212R           | C | 46.04 |
| 167 | JAK2 | SMF | TET2   | chr4:106156091  | T   | TA   | exonic   | p.C332Mfs*7       | A | 45.91 |
| 167 | JAK2 | SMF | TET2   | chr4:106157971  | C   | T    | exonic   | p.Q958X           | A | 39.7  |
| 167 | JAK2 | SMF | TET2   | chr4:106156790  | G   | A    | exonic   | p.W564X           | A | 5.73  |
| 168 | CALR | PMF | CALR   | chr19:13049564  | A   | G    | exonic   | p.K24R            | C | 52.01 |
| 168 | CALR | PMF | TET2   | chr4:106180823  | C   | T    | exonic   | p.S1284F          | A | 3.52  |
| 168 | CALR | PMF | ASXL1  | chr20:31022441  | A   | AG   | exonic   | p.G646Wfs*12      | A | 2.86  |
| 170 | JAK2 | SMF | ASXL2  | chr2:25966987   | G   | GT   | exonic   | p.T740Nfs*15      | A | 46.47 |
| 170 | JAK2 | SMF | CUX1   | chr7:101877330  | A   | G    | splicing | .                 | C | 41.02 |
| 170 | JAK2 | SMF | MAD1L1 | chr7:2054241    | C   | G    | exonic   | p.D419H           | C | 49.88 |
| 170 | JAK2 | SMF | PHF6   | chrX:133559286  | C   | T    | exonic   | p.R342X           | A | 3.09  |
| 170 | JAK2 | SMF | SH2B3  | chr12:111885286 | C   | T    | exonic   | p.R392W           | A | 86.47 |
| 170 | JAK2 | SMF | SMC1A  | chrX:53432008   | C   | T    | exonic   | p.R711Q           | B | 79.18 |
| 170 | JAK2 | SMF | SRSF2  | chr17:74732960  | G   | T    | exonic   | p.P95T            | A | 48.72 |
| 170 | JAK2 | SMF | TP53   | chr17:7578475   | G   | A    | exonic   | p.P152L           | A | 45.5  |
| 171 | JAK2 | PMF | ASXL1  | chr20:31021649  | AAC | A    | exonic   | p.T551Nfs*1       | A | 38.16 |
| 171 | JAK2 | PMF | NF1    | chr17:29585450  | C   | G    | exonic   | p.P1421R          | B | 8.19  |
| 171 | JAK2 | PMF | TET2   | chr4:106164879  | C   | CGTA | exonic   | p.T1249_E1250insV | B | 31.59 |
| 171 | JAK2 | PMF | U2AF1  | chr21:44514777  | T   | G    | exonic   | p.Q157P           | A | 36.56 |
| 172 | JAK2 | SMF | ASXL1  | chr20:31024758  | C   | T    | exonic   | p.R1415X          | A | 47.06 |
| 172 | JAK2 | SMF | NRAS   | chr1:115256536  | C   | T    | exonic   | p.A59T            | A | 24.58 |
| 172 | JAK2 | SMF | SRP72  | chr4:57355605   | A   | G    | exonic   | p.I426V           | C | 48.57 |
| 172 | JAK2 | SMF | TP53   | chr17:7577498   | C   | T    | splicing | .                 | A | 88.2  |
| 172 | JAK2 | SMF | TP53   | chr17:7577545   | T   | C    | exonic   | p.M246V           | A | 3.4   |
| 176 | JAK2 | PMF | ASXL1  | chr20:31022441  | A   | AG   | exonic   | p.G646Wfs*12      | A | 44.12 |
| 176 | JAK2 | PMF | KMT2D  | chr12:49424161  | A   | G    | exonic   | p.V4634A          | C | 48.61 |
| 176 | JAK2 | PMF | SRSF2  | chr17:74732959  | G   | T    | exonic   | p.P95H            | A | 48.51 |
| 177 | JAK2 | SMF | ASXL1  | chr20:31022385  | G   | GT   | exonic   | p.R625Pfs*9       | A | 13.21 |
| 177 | JAK2 | SMF | ASXL1  | chr20:31022471  | C   | CG   | exonic   | p.A654Gfs*2       | A | 4.72  |
| 177 | JAK2 | SMF | ASXL1  | chr20:31022922  | C   | T    | exonic   | p.Q803X           | A | 6.09  |

|     |      |     |        |                 |                               |    |          |               |   |       |
|-----|------|-----|--------|-----------------|-------------------------------|----|----------|---------------|---|-------|
| 177 | JAK2 | SMF | PDS5B  | chr13:33241961  | A                             | G  | exonic   | p.I229V       | C | 46.99 |
| 177 | JAK2 | SMF | SH2B3  | chr12:111885144 | T                             | TG | exonic   | p.L347Afs*37  | A | 6.17  |
| 178 | CALR | PMF | NOTCH1 | chr9:139400986  | C                             | T  | exonic   | p.C1336Y      | C | 32.09 |
| 178 | CALR | PMF | SF3B1  | chr2:198267359  | C                             | A  | exonic   | p.K666N       | A | 3.12  |
| 179 | JAK2 | PMF | ASXL1  | chr20:31022293  | T                             | TA | exonic   | p.C594Mfs*24  | A | 37.84 |
| 179 | JAK2 | PMF | ASXL1  | chr20:31022758  | AACTCCCCGTT                   | A  | exonic   | p.V751Lfs*17  | A | 2.26  |
| 179 | JAK2 | PMF | EED    | chr11:85977172  | T                             | A  | exonic   | p.H258Q       | B | 37.83 |
| 179 | JAK2 | PMF | ETV6   | chr12:12022357  | G                             | A  | splicing | .             | B | 39.81 |
| 179 | JAK2 | PMF | U2AF1  | chr21:44514777  | T                             | G  | exonic   | p.Q157P       | A | 43.73 |
| 179 | JAK2 | PMF | ZRSR2  | chrX:15827389   | C                             | T  | exonic   | p.R169X       | A | 78.65 |
| 180 | JAK2 | PMF | NPM1   | chr5:170827922  | G                             | C  | exonic   | p.R221T       | C | 53.03 |
| 180 | JAK2 | PMF | SRSF2  | chr17:74732935  | CGGCGGCTGTGGTGTGAGTCCGGG<br>G | C  | exonic   | p.P95_R102del | A | 30.25 |
| 181 | JAK2 | SMF |        |                 |                               |    |          | .             |   |       |
| 182 | JAK2 | SMF | TET2   | chr4:106155778  | G                             | GA | exonic   | p.T229Nfs*24  | A | 28.54 |
| 182 | JAK2 | SMF | TET2   | chr4:106196900  | A                             | G  | exonic   | p.S1745G      | C | 51.81 |
| 185 | CALR | PMF |        |                 |                               |    |          | .             |   |       |
| 195 | JAK2 | PMF | KMT2A  | chr11:118362578 | C                             | G  | exonic   | p.L1647V      | C | 50.17 |
| 195 | JAK2 | PMF | NF1    | chr17:29670078  | A                             | T  | exonic   | p.K2372X      | A | 5.7   |
| 195 | JAK2 | PMF | NOTCH1 | chr9:139405194  | C                             | T  | exonic   | p.C884Y       | B | 25.34 |
| 195 | JAK2 | PMF | SF3B1  | chr2:198267359  | C                             | G  | exonic   | p.K666N       | A | 27.4  |
| 195 | JAK2 | PMF | TET2   | chr4:106164913  | C                             | T  | exonic   | p.R1261C      | A | 6.59  |
| 195 | JAK2 | PMF | TET2   | chr4:106182983  | C                             | A  | exonic   | p.A1341E      | A | 5.66  |
| 195 | JAK2 | PMF | TET2   | chr4:106197371  | T                             | C  | exonic   | p.Y1902H      | A | 4.01  |
| 200 | JAK2 | PMF | SF3B1  | chr2:198267359  | C                             | G  | exonic   | p.K666N       | A | 48.84 |
| 201 | JAK2 | PMF | SH2B3  | chr12:111856571 | G                             | C  | exonic   | p.E208Q       | A | 48.56 |
| 201 | JAK2 | PMF | SH2B3  | chr12:111885467 | G                             | A  | exonic   | p.R415H       | B | 37.17 |
| 201 | JAK2 | PMF | TET2   | chr4:106190896  | AG                            | A  | exonic   | p.S1392Tfs*55 | A | 43.87 |
| 210 | MPL  | PMF | JAK2   | chr9:5073753    | T                             | C  | exonic   | p.L611S       | A | 45.15 |
| 211 | CALR | PMF | KMT2C  | chr7:151877154  | G                             | C  | exonic   | p.R2403G      | C | 50.97 |
| 211 | CALR | PMF | KMT2C  | chr7:152012241  | T                             | C  | exonic   | p.K191R       | C | 41.94 |
| 211 | CALR | PMF | BCOR   | chrX:39911649   | G                             | A  | exonic   | p.R1661X      | A | 74.74 |
| 215 | JAK2 | PMF | TP53   | chr17:7577548   | C                             | T  | exonic   | p.G245S       | A | 83.94 |
| 216 | MPL  | PMF | DOT1L  | chr19:2222259   | G                             | C  | exonic   | p.D1031H      | C | 49.74 |
| 216 | MPL  | PMF | KMT2A  | chr11:118376007 | C                             | T  | exonic   | p.L3134F      | B | 89.33 |
| 216 | MPL  | PMF | MPL    | chr1:43818306   | T                             | G  | exonic   | p.Y591D       | A | 59.9  |

|     |      |     |        |                 |       |    |          |               |   |       |
|-----|------|-----|--------|-----------------|-------|----|----------|---------------|---|-------|
| 217 | DM   | SMF | DNMT3A | chr2:25469506   | CCCTT | C  | exonic   | p.K420Afs*229 | A | 2.2   |
| 217 | DM   | SMF | IDH1   | chr2:209113113  | G     | A  | exonic   | p.R132C       | A | 2.42  |
| 217 | DM   | SMF | KMT2D  | chr12:49445043  | G     | A  | exonic   | p.P808L       | C | 58.27 |
| 217 | DM   | SMF | TET2   | chr4:106190855  | G     | A  | exonic   | p.C1378Y      | A | 12.23 |
| 217 | DM   | SMF | TET2   | chr4:106194076  | G     | A  | splicing | .             | B | 14.44 |
| 222 | CALR | SMF |        |                 |       |    |          | .             |   |       |
| 224 | JAK2 | PMF | ASXL1  | chr20:31023174  | A     | AC | exonic   | p.K888Qfs*5   | A | 44.93 |
| 224 | JAK2 | PMF | U2AF1  | chr21:44514777  | T     | G  | exonic   | p.Q157P       | A | 43.09 |
| 225 | JAK2 | PMF |        |                 |       |    |          | .             |   |       |
| 226 | MPL  | PMF | MPL    | chr1:43818306   | T     | G  | exonic   | p.Y591D       | A | 73.65 |
| 226 | MPL  | PMF | KIT    | chr4:55589773   | G     | C  | exonic   | p.D419H       | C | 48.53 |
| 226 | MPL  | PMF | TET2   | chr4:106190860  | C     | T  | exonic   | p.H1380Y      | A | 47.24 |
| 227 | JAK2 | PMF | TET2   | chr4:106156091  | T     | TA | exonic   | p.C332Mfs*7   | A | 49.62 |
| 227 | JAK2 | PMF | TET2   | chr4:106196234  | C     | T  | exonic   | p.Q1523X      | A | 2.28  |
| 227 | JAK2 | PMF | TET2   | chr4:106196560  | T     | A  | exonic   | p.Y1631X      | A | 2.37  |
| 227 | JAK2 | PMF | SMC3   | chr10:112362637 | G     | A  | exonic   | p.G1118R      | B | 45.15 |
| 229 | JAK2 | PMF | TET2   | chr4:106156747  | C     | T  | exonic   | p.R550X       | A | 17.62 |
| 229 | JAK2 | PMF | SRSF2  | chr17:74732959  | G     | T  | exonic   | p.P95H        | A | 49.35 |
| 230 | JAK2 | PMF | ASXL1  | chr20:31022288  | C     | G  | exonic   | p.Y591X       | A | 4.23  |
| 230 | JAK2 | PMF | EZH2   | chr7:148506209  | C     | G  | exonic   | p.A717P       | B | 3.7   |
| 230 | JAK2 | PMF | KMT2C  | chr7:151859783  | A     | T  | exonic   | p.S3627T      | C | 51.56 |
| 230 | JAK2 | PMF | U2AF1  | chr21:44514777  | T     | G  | exonic   | p.Q157P       | A | 5.01  |
| 232 | DM   | PMF | TET2   | chr4:106155457  | G     | T  | exonic   | p.G120X       | A | 47.04 |
| 232 | DM   | PMF | TET2   | chr4:106156690  | C     | T  | exonic   | p.Q531X       | A | 45.37 |
| 241 | JAK2 | PMF | SF3B1  | chr2:198267484  | G     | A  | exonic   | p.R625C       | A | 30.73 |
| 241 | JAK2 | PMF | TET2   | chr4:106157154  | AAG   | A  | exonic   | p.R686Sfs*5   | A | 33.38 |
| 246 | JAK2 | SMF | ATM    | chr11:108121603 | A     | G  | exonic   | p.N471D       | C | 44.08 |
| 251 | MPL  | PMF | ASXL1  | chr20:31022441  | A     | AG | exonic   | p.G646Wfs*12  | A | 10.58 |
| 251 | MPL  | PMF | DNMT3A | chr2:25505394   | C     | A  | exonic   | p.A122S       | C | 48.11 |
| 251 | MPL  | PMF | DNMT3A | chr2:25463575   | G     | C  | exonic   | p.L703V       | A | 2.24  |
| 251 | MPL  | PMF | DNMT3A | chr2:25470516   | G     | A  | exonic   | p.R320X       | A | 2.34  |
| 251 | MPL  | PMF | SH2B3  | chr12:111885879 | C     | T  | exonic   | p.L501F       | C | 51.34 |
| 251 | MPL  | PMF | TET2   | chr4:106196819  | G     | T  | exonic   | p.V1718L      | A | 47.36 |
| 252 | JAK2 | SMF | ASXL1  | chr20:31022441  | A     | AG | exonic   | p.G646Wfs*12  | A | 8.79  |
| 252 | JAK2 | SMF | BCORL1 | chrX:129149078  | G     | GA | exonic   | p.Q778Tfs*107 | A | 7.44  |
| 252 | JAK2 | SMF | PTPN11 | chr12:112915523 | A     | G  | exonic   | p.N308D       | C | 48.77 |

|     |      |     |        |                 |                           |    |          |              |   |       |
|-----|------|-----|--------|-----------------|---------------------------|----|----------|--------------|---|-------|
| 253 | CALR | PMF | RAD21  | chr8:117862916  | G                         | C  | exonic   | p.L521V      | C | 45.39 |
| 253 | CALR | PMF | TET2   | chr4:106157537  | A                         | AT | exonic   | p.R814Sfs*1  | A | 2.44  |
| 254 | CALR | PMF | EZH2   | chr7:148506225  | G                         | T  | exonic   | p.H711Q      | C | 48.44 |
| 254 | CALR | PMF | SF3B1  | chr2:198267480  | T                         | C  | exonic   | p.N626S      | A | 45.08 |
| 255 | DM   | PMF | KMT2C  | chr7:151878029  | G                         | A  | exonic   | p.P2306S     | C | 52.08 |
| 255 | DM   | PMF | EED    | chr11:85967522  | A                         | G  | exonic   | p.I174V      | C | 43.64 |
| 255 | DM   | PMF | IDH1   | chr2:209113112  | C                         | T  | exonic   | p.R132H      | A | 4.58  |
| 255 | DM   | PMF | ASXL1  | chr20:31022857  | T                         | A  | exonic   | p.L781X      | A | 3.88  |
| 257 | JAK2 | SMF | ASXL1  | chr20:31023283  | AGCCCCAGG                 | A  | exonic   | p.E923Dfs*21 | A | 42.7  |
| 257 | JAK2 | SMF | ETV6   | chr12:11905466  | G                         | A  | exonic   | p.R39Q       | C | 49.66 |
| 257 | JAK2 | SMF | EZH2   | chr7:148523666  | T                         | TG | exonic   | p.N263Qfs*7  | A | 46.08 |
| 257 | JAK2 | SMF | KIT    | chr4:55569962   | A                         | C  | exonic   | p.I277L      | C | 47.88 |
| 258 | JAK2 | SMF | U2AF1  | chr21:44514777  | T                         | G  | exonic   | p.Q157P      | A | 14.18 |
| 259 | CALR | PMF | ASXL1  | chr20:31022441  | A                         | AG | exonic   | p.G646Wfs*12 | A | 13.31 |
| 259 | CALR | PMF | ASXL1  | chr20:31022628  | G                         | T  | exonic   | p.E705X      | A | 2.3   |
| 259 | CALR | PMF | SH2B3  | chr12:111856183 | G                         | C  | exonic   | p.E78D       | C | 47.81 |
| 259 | CALR | PMF | ZRSR2  | chrX:15834014   | G                         | A  | splicing | .            | B | 32.46 |
| 261 | CALR | PMF | ASXL1  | chr20:31022441  | A                         | AG | exonic   | p.G646Wfs*12 | A | 36.68 |
| 261 | CALR | PMF | TET2   | chr4:106156307  | A                         | AG | exonic   | p.Q403Hfs*38 | A | 5.85  |
| 262 | JAK2 | PMF | ASXL1  | chr20:31021283  | C                         | T  | exonic   | p.Q428X      | A | 50.33 |
| 262 | JAK2 | PMF | SRSF2  | chr17:74732959  | G                         | T  | exonic   | p.P95H       | A | 53.65 |
| 263 | JAK2 | PMF | EZH2   | chr7:148507484  | T                         | G  | exonic   | p.D657A      | C | 47.82 |
| 263 | JAK2 | PMF | ETNK1  | chr12:22811995  | A                         | G  | exonic   | p.N244S      | A | 47.22 |
| 263 | JAK2 | PMF | ASXL1  | chr20:31021229  | A                         | T  | exonic   | p.K410X      | A | 46.93 |
| 264 | JAK2 | SMF | SF3B1  | chr2:198267360  | T                         | C  | exonic   | p.K666R      | A | 49.76 |
| 264 | JAK2 | SMF | ZRSR2  | chrX:15841207   | AG                        | A  | exonic   | p.D432Tfs*57 | A | 79.48 |
| 264 | JAK2 | SMF | ATM    | chr11:108196825 | C                         | T  | exonic   | p.S2283L     | C | 47.08 |
| 264 | JAK2 | SMF | ETV6   | chr12:12037492  | G                         | A  | exonic   | p.G375R      | B | 2.81  |
| 265 | JAK2 | SMF | ASXL1  | chr20:31023456  | G                         | T  | exonic   | p.E981X      | A | 28.06 |
| 265 | JAK2 | SMF | ASXL1  | chr20:31022402  | TCACCACTGCCATAGAGAGGCCGGC | T  | exonic   | p.E635Rfs*15 | A | 4.29  |
| 265 | JAK2 | SMF | ASXL1  | chr20:31022637  | CAGGCCGGAAGTCCATGTCCAG    | C  | exonic   | p.A709Lfs*8  | A | 4.22  |
| 265 | JAK2 | SMF | EZH2   | chr7:148506477  | C                         | T  | exonic   | p.V679M      | A | 6.82  |
| 265 | JAK2 | SMF | U2AF1  | chr21:44514777  | T                         | G  | exonic   | p.Q157P      | A | 31.66 |
| 265 | JAK2 | SMF | ZBTB33 | chrX:119388976  | T                         | C  | exonic   | p.I569T      | B | 39.16 |
| 266 | JAK2 | SMF | ASXL1  | chr20:31022441  | A                         | AG | exonic   | p.G646Wfs*12 | A | 37.47 |
| 266 | JAK2 | SMF | ATRX   | chrX:76938779   | G                         | A  | exonic   | p.P657S      | C | 49.07 |

|     |      |     |        |                 |    |    |        |              |   |       |
|-----|------|-----|--------|-----------------|----|----|--------|--------------|---|-------|
| 266 | JAK2 | SMF | PHF6   | chrX:133551305  | T  | C  | exonic | p.I314T      | A | 46.64 |
| 266 | JAK2 | SMF | SUZ12  | chr17:30323832  | T  | C  | exonic | p.S604P      | C | 42.17 |
| 266 | JAK2 | SMF | TP53   | chr17:7577535   | C  | A  | exonic | p.R249M      | A | 3.96  |
| 267 | TN   | PMF | ASXL1  | chr20:31023239  | G  | GA | exonic | p.Q910Tfs*13 | A | 45.68 |
| 267 | TN   | PMF | EZH2   | chr7:148512045  | G  | A  | exonic | p.Q545X      | A | 49.28 |
| 267 | TN   | PMF | EZH2   | chr7:148544274  | C  | A  | exonic | p.K39N       | C | 52.8  |
| 267 | TN   | PMF | IKZF1  | chr7:50468296   | C  | T  | exonic | p.R511X      | A | 4.79  |
| 267 | TN   | PMF | KIT    | chr4:55599321   | A  | T  | exonic | p.D816V      | A | 48.34 |
| 267 | TN   | PMF | KMT2D  | chr12:49420846  | G  | C  | exonic | p.P4968R     | C | 53.49 |
| 267 | TN   | PMF | PTPN11 | chr12:112888197 | T  | G  | exonic | p.F71L       | A | 3.84  |
| 267 | TN   | PMF | U2AF1  | chr21:44514777  | T  | G  | exonic | p.Q157P      | A | 50.38 |
| 268 | JAK2 | SMF | ASXL1  | chr20:31024758  | C  | T  | exonic | p.R1415X     | A | 43.31 |
| 268 | JAK2 | SMF | ETV6   | chr12:11992196  | C  | CT | exonic | p.L97Afs*14  | A | 46.86 |
| 268 | JAK2 | SMF | KMT2C  | chr7:151970884  | A  | C  | exonic | p.Y306X      | A | 5.46  |
| 268 | JAK2 | SMF | KMT2D  | chr12:49444713  | G  | C  | exonic | p.S918C      | C | 47.72 |
| 268 | JAK2 | SMF | SRSF2  | chr17:74732959  | G  | A  | exonic | p.P95L       | A | 47.56 |
| 270 | JAK2 | SMF | ASXL1  | chr20:31022441  | A  | AG | exonic | p.G646Wfs*12 | A | 15.9  |
| 270 | JAK2 | SMF | ASXL1  | chr20:31023372  | C  | CT | exonic | p.D954fs*    | A | 17.77 |
| 270 | JAK2 | SMF | CHEK2  | chr22:29121241  | C  | T  | exonic | p.R188Q      | B | 3.59  |
| 270 | JAK2 | SMF | SRSF2  | chr17:74732506  | G  | T  | exonic | p.R135S      | B | 2.79  |
| 270 | JAK2 | SMF | TP53   | chr17:7577556   | C  | A  | exonic | p.C242F      | A | 47.0  |
| 272 | JAK2 | PMF | SUZ12  | chr17:30303624  | A  | C  | exonic | p.D303A      | B | 36.9  |
| 273 | CALR | PMF | PPM1D  | chr17:58740836  | C  | T  | exonic | p.R581X      | A | 8.94  |
| 273 | CALR | PMF | ZRSR2  | chrX:15822241   | TA | T  | exonic | p.K108Rfs*56 | A | 13.64 |
| 273 | CALR | PMF | ZRSR2  | chrX:15821853   | AC | A  | exonic | p.Q83Kfs*5   | A | 3.69  |
| 276 | JAK2 | PMF | SF3B1  | chr2:198267359  | C  | A  | exonic | p.K666N      | A | 27.5  |
| 278 | JAK2 | PMF | ZRSR2  | chrX:15841142   | A  | T  | exonic | p.K409I      | C | 97.36 |
| 279 | JAK2 | PMF | KMT2C  | chr7:151970835  | T  | C  | exonic | p.I323V      | B | 15.08 |
| 279 | JAK2 | PMF | ZRSR2  | chrX:15841083   | C  | G  | exonic | p.Y389X      | A | 89.22 |
| 280 | JAK2 | PMF | NFE2   | chr12:54686469  | G  | A  | exonic | p.R271X      | A | 4.4   |
| 280 | JAK2 | PMF | NOTCH1 | chr9:139405720  | G  | A  | exonic | p.A824V      | C | 48.77 |
| 285 | JAK2 | PMF | DNMT3A | chr2:25457242   | C  | T  | exonic | p.R882H      | A | 40.56 |
| 287 | CALR | PMF | ASXL1  | chr20:31022440  | G  | GA | exonic | p.G643Rfs*13 | A | 30.36 |
| 291 | JAK2 | SMF |        |                 |    |    |        | .            |   |       |
| 293 | CALR | PMF | TET2   | chr4:106194051  | G  | A  | exonic | p.A1505T     | A | 49.69 |
| 294 | JAK2 | PMF | ASXL2  | chr2:25973210   | TG | T  | exonic | p.P405Qfs*17 | A | 38.72 |

|     |      |     |        |                 |            |    |          |                    |   |        |
|-----|------|-----|--------|-----------------|------------|----|----------|--------------------|---|--------|
| 294 | JAK2 | PMF | CSF3R  | chr1:36933434   | G          | A  | exonic   | p.T618I            | A | 42.26  |
| 294 | JAK2 | PMF | TET2   | chr4:106197285  | T          | C  | exonic   | p.I1873T           | A | 43.77  |
| 294 | JAK2 | PMF | TP53   | chr17:7577120   | C          | T  | exonic   | p.R273H            | A | 35.45  |
| 294 | JAK2 | PMF | U2AF1  | chr21:44514777  | T          | G  | exonic   | p.Q157P            | A | 45.8   |
| 295 | JAK2 | PMF | JAK2   | chr9:5066713    | G          | A  | exonic   | p.G417D            | C | 47.9   |
| 295 | JAK2 | PMF | ASXL2  | chr2:25967005   | G          | GT | exonic   | p.T734Nfs*21       | A | 45.02  |
| 295 | JAK2 | PMF | SRSF2  | chr17:74732951  | AGTCCGGGGG | A  | exonic   | p.P95_D97del       | B | 43.27  |
| 295 | JAK2 | PMF | RUNX1  | chr21:36253007  | CCA        | C  | exonic   | p.V118Gfs*18       | A | 38.2   |
| 296 | JAK2 | PMF |        |                 |            |    |          | .                  |   |        |
| 303 | JAK2 | SMF | PAX5   | chr9:37015093   | C          | T  | exonic   | p.R104H            | C | 99.33  |
| 303 | JAK2 | SMF | PHF6   | chrX:133511745  | T          | TA | exonic   | p.S34Ifs*1         | A | 100.37 |
| 303 | JAK2 | SMF | PPM1D  | chr17:58740529  | C          | A  | exonic   | p.C478X            | A | 12.08  |
| 303 | JAK2 | SMF | TET2   | chr4:106158484  | G          | GA | exonic   | p.D1129Efs*12      | A | 49.92  |
| 304 | JAK2 | PMF | ASXL1  | chr20:31022441  | A          | AG | exonic   | p.G646Wfs*12       | A | 39.11  |
| 304 | JAK2 | PMF | ETNK1  | chr12:22811995  | A          | G  | exonic   | p.N244S            | A | 9.97   |
| 304 | JAK2 | PMF | JAK2   | chr9:5054840    | T          | C  | exonic   | p.W298R            | B | 7.98   |
| 304 | JAK2 | PMF | U2AF2  | chr19:56173940  | T          | G  | exonic   | p.L187V            | C | 48.01  |
| 307 | JAK2 | PMF | ACD    | chr16:67692043  | C          | T  | exonic   | p.R437H            | C | 51.61  |
| 307 | JAK2 | PMF | ASXL1  | chr20:31022784  | C          | T  | exonic   | p.Q757X            | A | 11.93  |
| 307 | JAK2 | PMF | PTPN11 | chr12:112940044 | A          | T  | exonic   | p.T566S            | C | 48.55  |
| 307 | JAK2 | PMF | SETBP1 | chr18:42533266  | C          | T  | exonic   | p.R1321C           | C | 48.05  |
| 307 | JAK2 | PMF | SRSF2  | chr17:74732959  | G          | T  | exonic   | p.P95H             | A | 34.85  |
| 308 | JAK2 | SMF | CHEK2  | chr22:29121357  | T          | C  | splicing | .                  | C | 47.86  |
| 308 | JAK2 | SMF | CSF3R  | chr1:36937083   | G          | C  | exonic   | p.N412K            | C | 46.93  |
| 308 | JAK2 | SMF | EED    | chr11:85956280  | G          | T  | exonic   | p.E3D              | C | 53.1   |
| 309 | JAK2 | PMF | BCOR   | chrX:39934126   | C          | CT | exonic   | p.S158Kfs*27       | A | 13.89  |
| 309 | JAK2 | PMF | JAK2   | chr9:5090448    | C          | T  | exonic   | p.R922W            | B | 39.87  |
| 309 | JAK2 | PMF | KMT2D  | chr12:49426151  | C          | T  | exonic   | p.G4113R           | C | 47.22  |
| 309 | JAK2 | PMF | U2AF1  | chr21:44524456  | G          | A  | exonic   | p.S34F             | A | 13.96  |
| 311 | CALR | SMF | ASXL1  | chr20:31021115  | C          | A  | exonic   | p.Q372K            | C | 49.8   |
| 311 | CALR | SMF | CEBPA  | chr19:33792851  | GGCC       | G  | exonic   | p.G151_R156delinsD | B | 60.97  |
| 313 | JAK2 | PMF |        |                 |            |    |          | .                  |   |        |
| 314 | JAK2 | PMF | BCOR   | chrX:39933218   | T          | C  | exonic   | p.M461V            | C | 99.95  |
| 314 | JAK2 | PMF | KMT2C  | chr7:151845223  | G          | A  | exonic   | p.R4597C           | C | 48.67  |
| 315 | CALR | PMF | ASXL1  | chr20:31022592  | C          | T  | exonic   | p.R693X            | A | 5.24   |

|     |      |     |        |                 |   |              |          |                  |   |       |
|-----|------|-----|--------|-----------------|---|--------------|----------|------------------|---|-------|
| 316 | CALR | SMF | ASXL1  | chr20:31022441  | A | AG           | exonic   | p.G646Wfs*12     | A | 41.5  |
| 316 | CALR | SMF | EZH2   | chr7:148504778  | A | G            | exonic   | p.L739P          | B | 2.9   |
| 316 | CALR | SMF | EZH2   | chr7:148543683  | A | AACAT        | exonic   | p.F42Yfs*2       | A | 2.16  |
| 316 | CALR | SMF | KMT2C  | chr7:151879312  | G | A            | exonic   | p.S1878L         | C | 51.99 |
| 317 | JAK2 | PMF | PDS5B  | chr13:33247438  | A | G            | exonic   | p.N264S          | C | 46.73 |
| 317 | JAK2 | PMF | SUZ12  | chr17:30325741  | A | ATAAT        | exonic   | p.K649Nfs*1      | A | 4.9   |
| 318 | JAK2 | PMF | ASXL1  | chr20:31022441  | A | AG           | exonic   | p.G646Wfs*12     | A | 33.26 |
| 318 | JAK2 | PMF | CUX1   | chr7:101882758  | C | T            | exonic   | p.R1272X         | A | 2.89  |
| 318 | JAK2 | PMF | KMT2B  | chr19:36224055  | T | G            | exonic   | p.V2202G         | C | 50.6  |
| 318 | JAK2 | PMF | U2AF1  | chr21:44514777  | T | G            | exonic   | p.Q157P          | A | 36.66 |
| 318 | JAK2 | PMF | ZBTB33 | chrX:119388925  | G | T            | exonic   | p.C552F          | B | 14.37 |
| 318 | JAK2 | PMF | ZRSR2  | chrX:15833798   | A | G            | splicing | .                | C | 50.53 |
| 324 | JAK2 | PMF | JAK1   | chr1:65332620   | C | T            | exonic   | p.G307S          | C | 46.89 |
| 324 | JAK2 | PMF | TP53   | chr17:7579717   | G | A            | exonic   | p.P27S           | B | 32.75 |
| 325 | JAK2 | SMF | ASXL1  | chr20:31022441  | A | AG           | exonic   | p.G646Wfs*12     | A | 6.0   |
| 325 | JAK2 | SMF | SMC3   | chr10:112362637 | G | A            | exonic   | p.G1118R         | B | 33.53 |
| 325 | JAK2 | SMF | SUZ12  | chr17:30323829  | T | G            | exonic   | p.F603V          | C | 59.33 |
| 325 | JAK2 | SMF | TET2   | chr4:106163995  | G | A            | exonic   | p.G1169R         | A | 32.19 |
| 326 | CALR | SMF | ASXL1  | chr20:31022441  | A | AG           | exonic   | p.G646Wfs*12     | A | 6.08  |
| 326 | CALR | SMF | ASXL1  | chr20:31022784  | C | T            | exonic   | p.Q757X          | A | 2.58  |
| 326 | CALR | SMF | CEBPA  | chr19:33793293  | C | T            | exonic   | p.E10K           | C | 41.28 |
| 326 | CALR | SMF | NFE2   | chr12:54686919  | G | A            | exonic   | p.Q121X          | A | 50.05 |
| 328 | JAK2 | SMF | ASXL1  | chr20:31022385  | G | GT           | exonic   | p.R625Pfs*9      | A | 42.72 |
| 328 | JAK2 | SMF | ATM    | chr11:108170491 | A | G            | exonic   | p.I1686V         | C | 47.96 |
| 328 | JAK2 | SMF | DNMT3A | chr2:25464554   | C | G            | exonic   | p.L653F          | A | 9.27  |
| 329 | CALR | SMF | DNMT3A | chr2:25457242   | C | T            | exonic   | p.R882H          | A | 47.6  |
| 329 | CALR | SMF | SH2B3  | chr12:111855977 | T | TCGCCCTCTCCG | exonic   | p.S16_A17insSAPS | C | 39.35 |
| 330 | MPL  | SMF | TET2   | chr4:106164895  | T | TA           | exonic   | p.Y1255fs*       | A | 16.93 |
| 330 | MPL  | SMF | TP53   | chr17:7577094   | G | A            | exonic   | p.R282W          | A | 2.56  |
| 331 | JAK2 | SMF | CSF3R  | chr1:36941169   | G | A            | exonic   | p.P57L           | C | 48.28 |
| 331 | JAK2 | SMF | TET2   | chr4:106197282  | T | G            | exonic   | p.L1872R         | A | 5.11  |
| 333 | JAK2 | PMF | ASXL1  | chr20:31021236  | C | CT           | exonic   | p.R413Sfs*24     | A | 50.02 |
| 333 | JAK2 | PMF | MPL    | chr1:43818334   | G | A            | exonic   | p.G600E          | B | 98.24 |
| 333 | JAK2 | PMF | NF1    | chr17:29679283  | A | G            | exonic   | p.K2489R         | C | 48.53 |
| 333 | JAK2 | PMF | SRSF2  | chr17:74732959  | G | T            | exonic   | p.P95H           | A | 53.62 |
| 333 | JAK2 | PMF | TET2   | chr4:106157384  | A | AC           | exonic   | p.Q764Pfs*4      | A | 49.76 |



|     |      |     |        |                |        |                    |          |                            |   |       |
|-----|------|-----|--------|----------------|--------|--------------------|----------|----------------------------|---|-------|
| 334 | CALR | PMF | ASXL1  | chr20:31022441 | A      | AG                 | exonic   | p.G646Wfs*12               | A | 31.64 |
| 334 | CALR | PMF | CUX1   | chr7:101891892 | G      | A                  | exonic   | p.R1374Q                   | C | 48.73 |
| 335 | JAK2 | PMF | ASXL1  | chr20:31021268 | AAT    | A                  | exonic   | p.N423Tfs*13               | A | 42.49 |
| 335 | JAK2 | PMF | SRSF2  | chr17:74732959 | G      | T                  | exonic   | p.P95H                     | A | 47.34 |
| 335 | JAK2 | PMF | TET2   | chr4:106190783 | GA     | G                  | exonic   | p.A1355Hfs*7               | A | 40.33 |
| 336 | JAK2 | SMF | JAK2   | chr9:5064902   | T      | C                  | exonic   | p.L359S                    | B | 88.22 |
| 339 | JAK2 | SMF | ASXL2  | chr2:25966049  | G      | GGT                | exonic   | p.Q1053Tfs*6               | A | 18.92 |
| 339 | JAK2 | SMF | DNMT3A | chr2:25467474  | C      | A                  | exonic   | p.Q534H                    | B | 13.76 |
| 339 | JAK2 | SMF | NF1    | chr17:29508438 | A      | C                  | splicing | .                          | B | 2.76  |
| 339 | JAK2 | SMF | PPM1D  | chr17:58740374 | TG     | T                  | exonic   | p.W427Cfs*3                | A | 29.11 |
| 339 | JAK2 | SMF | PPM1D  | chr17:58740375 | G      | A                  | exonic   | p.W427X                    | A | 18.62 |
| 339 | JAK2 | SMF | SUZ12  | chr17:30264453 | C      | T                  | exonic   | p.A63V                     | B | 34.6  |
| 342 | JAK2 | SMF | SF3B1  | chr2:198267359 | C      | G                  | exonic   | p.K666N                    | A | 47.5  |
| 342 | JAK2 | SMF | TET2   | chr4:106190824 | T      | TTCTCAGGGGTCCTG    | exonic   | p.T1372_A1373insVSG<br>VT  | B | 20.04 |
| 342 | JAK2 | SMF | TET2   | chr4:106190842 | T      | TGTTTGACTTCTGTGCTC | exonic   | p.A1379_H1380insRLD<br>FCA | B | 13.4  |
| 343 | CALR | PMF | ASXL1  | chr20:31022441 | A      | AG                 | exonic   | p.G646Wfs*12               | A | 32.09 |
| 343 | CALR | PMF | EED    | chr11:85979560 | A      | C                  | exonic   | p.Y308S                    | B | 2.43  |
| 343 | CALR | PMF | KMT2C  | chr7:151917799 | T      | C                  | exonic   | p.Q1174R                   | C | 46.67 |
| 343 | CALR | PMF | TET2   | chr4:106197245 | G      | T                  | exonic   | p.G1860W                   | B | 5.88  |
| 344 | JAK2 | SMF | ASXL1  | chr20:31023076 | C      | CT                 | exonic   | p.D855fs*                  | A | 16.87 |
| 344 | JAK2 | SMF | GATA2  | chr3:128204842 | C      | T                  | exonic   | p.G200D                    | C | 47.89 |
| 345 | JAK2 | SMF | ASXL1  | chr20:31022441 | A      | AG                 | exonic   | p.G646Wfs*12               | A | 32.99 |
| 345 | JAK2 | SMF | KRAS   | chr12:25398281 | C      | T                  | exonic   | p.G13D                     | A | 12.98 |
| 345 | JAK2 | SMF | PHF6   | chrX:133527636 | C      | T                  | exonic   | p.R116X                    | A | 23.72 |
| 345 | JAK2 | SMF | PHF6   | chrX:133511668 | G      | GA                 | exonic   | p.G10Rfs*11                | A | 3.6   |
| 345 | JAK2 | SMF | ZRSR2  | chrX:15836766  | G      | C                  | splicing | .                          | B | 22.91 |
| 346 | JAK2 | PMF | SRP72  | chr4:57333826  | G      | C                  | exonic   | p.V9L                      | C | 48.92 |
| 346 | JAK2 | PMF | TET2   | chr4:106157215 | C      | A                  | exonic   | p.Q706K                    | C | 51.27 |
| 346 | JAK2 | PMF | ASXL1  | chr20:31022441 | A      | AG                 | exonic   | p.G646Wfs*12               | A | 34.58 |
| 347 | JAK2 | SMF | ASXL1  | chr20:31022839 | T      | A                  | exonic   | p.L775X                    | A | 48.86 |
| 347 | JAK2 | SMF | EZH2   | chr7:148544291 | G      | A                  | exonic   | p.R34X                     | A | 89.94 |
| 347 | JAK2 | SMF | EZH2   | chr7:148526858 | A      | C                  | exonic   | p.L149R                    | B | 4.35  |
| 347 | JAK2 | SMF | PHF6   | chrX:133549044 | AGTT   | A                  | exonic   | p.L244Vfs*19               | A | 92.4  |
| 348 | JAK2 | PMF | ASXL1  | chr20:31021642 | CTTTCG | C                  | exonic   | p.F548fs*                  | A | 40.3  |
| 348 | JAK2 | PMF | ETV6   | chr12:12037471 | T      | C                  | exonic   | p.F368L                    | B | 2.27  |

|     |      |     |        |                 |                |          |          |              |   |       |
|-----|------|-----|--------|-----------------|----------------|----------|----------|--------------|---|-------|
| 348 | JAK2 | PMF | SRSF2  | chr17:74732959  | G              | T        | exonic   | p.P95H       | A | 46.67 |
| 348 | JAK2 | PMF | TET2   | chr4:106196819  | G              | T        | exonic   | p.V1718L     | A | 47.04 |
| 349 | JAK2 | SMF | CBL    | chr11:119170387 | G              | C        | exonic   | p.D873H      | C | 47.01 |
| 349 | JAK2 | SMF | TET2   | chr4:106162517  | A              | C        | exonic   | p.E1144A     | A | 27.78 |
| 350 | TN   | SMF |        |                 |                |          |          | .            |   |       |
| 352 | CALR | PMF | ASXL1  | chr20:31023717  | C              | T        | exonic   | p.R1068X     | A | 36.4  |
| 352 | CALR | PMF | KMT2C  | chr7:151945604  | C              | A        | exonic   | p.G639C      | A | 45.02 |
| 352 | CALR | PMF | TET2   | chr4:106156478  | C              | T        | exonic   | p.S460F      | A | 45.59 |
| 354 | CALR | SMF | ATM    | chr11:108165679 | G              | A        | exonic   | p.S1601N     | C | 47.57 |
| 354 | CALR | SMF | ATM    | chr11:108196263 | A              | G        | exonic   | p.N2267D     | B | 2.14  |
| 354 | CALR | SMF | BCL11A | chr2:60688260   | C              | T        | exonic   | p.R596H      | C | 48.87 |
| 354 | CALR | SMF | BCORL1 | chrX:129162789  | C              | T        | exonic   | p.R1420X     | A | 85.48 |
| 354 | CALR | SMF | TET2   | chr4:106190860  | C              | T        | exonic   | p.H1380Y     | A | 48.76 |
| 354 | CALR | SMF | TET2   | chr4:106157025  | G              | GT       | exonic   | p.S643Ffs*37 | A | 4.04  |
| 356 | CALR | SMF | ASXL1  | chr20:31023489  | CTGAGTCCTCACGG | C        | exonic   | p.H995Rfs*24 | A | 38.77 |
| 356 | CALR | SMF | CBL    | chr11:119149002 | T              | G        | exonic   | p.W408G      | A | 35.15 |
| 356 | CALR | SMF | EZH2   | chr7:148529764  | T              | TA       | exonic   | p.I109Yfs*16 | A | 49.04 |
| 356 | CALR | SMF | TP53   | chr17:7576928   | T              | A        | splicing | .            | A | 98.18 |
| 357 | JAK2 | SMF | TET2   | chr4:106157017  | C              | T        | exonic   | p.Q640X      | A | 38.47 |
| 357 | JAK2 | SMF | TET2   | chr4:106157181  | T              | TA       | exonic   | p.M695Nfs*16 | A | 2.47  |
| 357 | JAK2 | SMF | TET2   | chr4:106164778  | C              | T        | exonic   | p.R1216X     | A | 4.71  |
| 358 | JAK2 | SMF | KMT2B  | chr19:36216691  | C              | T        | exonic   | p.T1286I     | C | 43.33 |
| 358 | JAK2 | SMF | RUNX1  | chr21:36421141  | C              | T        | exonic   | p.R19K       | A | 46.05 |
| 358 | JAK2 | SMF | TET2   | chr4:106196819  | G              | T        | exonic   | p.V1718L     | A | 49.01 |
| 360 | JAK2 | SMF | ASXL1  | chr20:31022485  | A              | AGGGAGGT | exonic   | p.G662Wfs*7  | A | 13.75 |
| 360 | JAK2 | SMF | ASXL1  | chr20:31022981  | AT             | A        | exonic   | p.L823fs*    | A | 6.25  |
| 360 | JAK2 | SMF | DNMT3A | chr2:25457289   | CC             | AG       | exonic   | p.R866S      | B | 35.54 |
| 361 | JAK2 | SMF | SRSF2  | chr17:74732959  | G              | T        | exonic   | p.P95H       | A | 45.02 |
| 361 | JAK2 | SMF | TP53   | chr17:7577538   | C              | T        | exonic   | p.R248Q      | A | 37.25 |
| 361 | JAK2 | SMF | ZBTB33 | chrX:119388758  | T              | G        | exonic   | p.C496W      | B | 86.42 |
| 363 | JAK2 | SMF | DNMT3A | chr2:25467121   | AT             | A        | exonic   | p.M585Cfs*65 | A | 12.91 |
| 363 | JAK2 | SMF | IDH1   | chr2:209116208  | C              | T        | exonic   | p.W23X       | A | 51.13 |
| 364 | CALR | PMF |        |                 |                |          |          | .            |   |       |
| 365 | CALR | PMF | DNMT3A | chr2:25505372   | G              | A        | exonic   | p.S129L      | C | 49.46 |
| 368 | JAK2 | PMF |        |                 |                |          |          | .            |   |       |
| 369 | JAK2 | PMF | CBL    | chr11:119148891 | T              | C        | exonic   | p.Y371H      | A | 90.27 |

|     |      |     |        |                 |                               |        |          |               |   |       |
|-----|------|-----|--------|-----------------|-------------------------------|--------|----------|---------------|---|-------|
| 369 | JAK2 | PMF | CBL    | chr11:119144697 | C                             | G      | exonic   | p.S237W       | B | 2.39  |
| 369 | JAK2 | PMF | NOTCH1 | chr9:139405665  | CCCG                          | C      | exonic   | p.G842del     | C | 46.75 |
| 369 | JAK2 | PMF | U2AF1  | chr21:44514777  | T                             | C      | exonic   | p.Q157R       | A | 47.76 |
| 380 | JAK2 | SMF | ASXL1  | chr20:31022385  | G                             | GT     | exonic   | p.R625Pfs*9   | A | 17.46 |
| 380 | JAK2 | SMF | ASXL1  | chr20:31022796  | G                             | GC     | exonic   | p.P763Afs*10  | A | 24.25 |
| 380 | JAK2 | SMF | ASXL1  | chr20:31022674  | A                             | AACCTG | exonic   | p.D720Efs*6   | A | 2.27  |
| 380 | JAK2 | SMF | ASXL1  | chr20:31022898  | TC                            | T      | exonic   | p.W796Gfs*21  | A | 2.12  |
| 380 | JAK2 | SMF | ASXL1  | chr20:31022960  | G                             | GT     | exonic   | p.S816Ffs*4   | A | 2.36  |
| 380 | JAK2 | SMF | ASXL1  | chr20:31023122  | TG                            | T      | exonic   | p.G870Afs*5   | A | 2.39  |
| 380 | JAK2 | SMF | ASXL1  | chr20:31023399  | G                             | GTGCC  | exonic   | p.S964Afs*6   | A | 2.02  |
| 380 | JAK2 | SMF | ASXL1  | chr20:31023643  | TG                            | T      | exonic   | p.S1044Pfs*1  | A | 2.84  |
| 380 | JAK2 | SMF | PPM1D  | chr17:58740536  | GC                            | G      | exonic   | p.L482fs*     | A | 18.13 |
| 381 | TN   | PMF | BCOR   | chrX:39921390   | A                             | C      | splicing | .             | B | 94.77 |
| 381 | TN   | PMF | BCORL1 | chrX:129154981  | C                             | A      | exonic   | p.P1155T      | C | 100.0 |
| 381 | TN   | PMF | IDH2   | chr15:90631934  | C                             | T      | exonic   | p.R140Q       | A | 43.81 |
| 381 | TN   | PMF | SRSF2  | chr17:74732959  | G                             | C      | exonic   | p.P95R        | A | 51.02 |
| 382 | MPL  | PMF | IDH1   | chr2:209113112  | C                             | T      | exonic   | p.R132H       | A | 41.67 |
| 382 | MPL  | PMF | KMT2C  | chr7:151873980  | CA                            | C      | exonic   | p.C2853Afs*9  | A | 37.86 |
| 382 | MPL  | PMF | MPL    | chr1:43805735   | C                             | T      | exonic   | p.S264F       | B | 72.5  |
| 382 | MPL  | PMF | SRSF2  | chr17:74732935  | CGGCGGCTGTGGTGTGAGTCCGGG<br>G | C      | exonic   | p.P95_R102del | A | 30.19 |
| 383 | JAK2 | PMF |        |                 |                               |        |          | .             |   |       |
| 385 | JAK2 | SMF | ASXL1  | chr20:31023476  | AGACTC                        | A      | exonic   | p.D988fs*     | A | 4.78  |
| 385 | JAK2 | SMF | KIT    | chr4:55569975   | G                             | A      | exonic   | p.R281K       | C | 42.89 |
| 385 | JAK2 | SMF | NFE2   | chr12:54686793  | T                             | TC     | exonic   | p.T163Dfs*37  | A | 2.54  |
| 385 | JAK2 | SMF | SRP72  | chr4:57340269   | T                             | G      | exonic   | p.L135R       | C | 48.22 |
| 385 | JAK2 | SMF | TET2   | chr4:106182914  | A                             | G      | splicing | .             | A | 25.55 |
| 386 | MPL  | PMF |        |                 |                               |        |          | .             |   |       |
| 387 | JAK2 | PMF | ASXL1  | chr20:31022441  | A                             | AG     | exonic   | p.G646Wfs*12  | A | 18.28 |
| 387 | JAK2 | PMF | CTCF   | chr16:67650714  | ATCG                          | A      | exonic   | p.R342del     | B | 22.22 |
| 387 | JAK2 | PMF | JAK2   | chr9:5090745    | G                             | A      | exonic   | p.E965K       | C | 48.23 |
| 387 | JAK2 | PMF | RUNX1  | chr21:36252925  | T                             | C      | exonic   | p.N146S       | B | 27.11 |
| 387 | JAK2 | PMF | U2AF1  | chr21:44514777  | T                             | G      | exonic   | p.Q157P       | A | 25.63 |
| 390 | TN   | PMF | ASXL1  | chr20:31022441  | A                             | AG     | exonic   | p.G646Wfs*12  | A | 36.79 |
| 390 | TN   | PMF | ETV6   | chr12:12037394  | G                             | A      | exonic   | p.W342X       | A | 45.41 |
| 390 | TN   | PMF | PHF6   | chrX:133549112  | A                             | G      | exonic   | p.K266E       | B | 91.85 |

|     |      |     |        |                 |                   |        |          |               |   |       |
|-----|------|-----|--------|-----------------|-------------------|--------|----------|---------------|---|-------|
| 390 | TN   | PMF | U2AF1  | chr21:44514777  | T                 | G      | exonic   | p.Q157P       | A | 43.66 |
| 390 | TN   | PMF | ZBTB33 | chrX:119387488  | T                 | G      | exonic   | p.I73R        | B | 87.37 |
| 396 | JAK2 | SMF | DNMT3A | chr2:25462067   | AATCATCACAGGGTTGG | ATGTGA | exonic   | p.p.N776Tfs*5 | A | 7.29  |
| 396 | JAK2 | SMF | DNMT3A | chr2:25470581   | C                 | T      | exonic   | p.G298E       | A | 3.03  |
| 396 | JAK2 | SMF | KMT2C  | chr7:151880204  | T                 | C      | exonic   | p.N1707S      | C | 49.88 |
| 396 | JAK2 | SMF | KMT2D  | chr12:49432300  | G                 | T      | exonic   | p.H2947N      | C | 48.51 |
| 396 | JAK2 | SMF | NFE2   | chr12:54686494  | GCTCT             | G      | exonic   | p.E261Afs*2   | A | 2.14  |
| 396 | JAK2 | SMF | TET2   | chr4:106197207  | G                 | A      | exonic   | p.W1847X      | A | 14.13 |
| 397 | CALR | SMF | STAG2  | chrX:123189982  | A                 | G      | exonic   | p.S401G       | C | 40.63 |
| 399 | JAK2 | SMF | SF3B1  | chr2:198267359  | C                 | G      | exonic   | p.K666N       | A | 48.14 |
| 400 | JAK2 | SMF | TET2   | chr4:106196291  | C                 | T      | exonic   | p.Q1542X      | A | 42.36 |
| 400 | JAK2 | SMF | NFE2   | chr12:54686463  | G                 | A      | exonic   | p.R273W       | C | 43.49 |
| 401 | JAK2 | PMF | BCOR   | chrX:39921390   | A                 | T      | splicing | .             | B | 74.53 |
| 401 | JAK2 | PMF | CUX1   | chr7:101747635  | T                 | TA     | exonic   | p.E155Rfs*6   | A | 6.2   |
| 401 | JAK2 | PMF | GNAS   | chr20:57484421  | G                 | A      | exonic   | p.R844H       | A | 24.2  |
| 401 | JAK2 | PMF | PDS5B  | chr13:33261421  | C                 | T      | exonic   | p.R452X       | A | 25.43 |
| 402 | CALR | PMF |        |                 |                   |        |          | .             |   |       |
| 404 | JAK2 | PMF | FBXW7  | chr4:153249379  | T                 | C      | exonic   | p.M467V       | B | 9.9   |
| 404 | JAK2 | PMF | NFE2   | chr12:54686516  | GC                | G      | exonic   | p.A255Qfs*4   | A | 16.99 |
| 404 | JAK2 | PMF | SF3B1  | chr2:198266834  | T                 | C      | exonic   | p.K700E       | A | 35.81 |
| 404 | JAK2 | PMF | TET2   | chr4:106157896  | C                 | T      | exonic   | p.Q933X       | A | 20.24 |
| 405 | JAK2 | PMF | ASXL2  | chr2:25966018   | T                 | C      | exonic   | p.Q1063R      | C | 44.29 |
| 405 | JAK2 | PMF | SH2B3  | chr12:111885286 | C                 | T      | exonic   | p.R392W       | A | 49.69 |
| 405 | JAK2 | PMF | TET2   | chr4:106156441  | G                 | T      | exonic   | p.E448X       | A | 5.53  |
| 405 | JAK2 | PMF | TET2   | chr4:106193849  | G                 | GA     | exonic   | p.R1440Tfs*37 | A | 6.46  |
| 406 | JAK2 | SMF | ASXL1  | chr20:31022441  | A                 | AG     | exonic   | p.G646Wfs*12  | A | 39.67 |
| 406 | JAK2 | SMF | PAX5   | chr9:37020726   | C                 | T      | exonic   | p.R40K        | C | 54.17 |
| 406 | JAK2 | SMF | U2AF1  | chr21:44514777  | T                 | C      | exonic   | p.Q157R       | A | 41.73 |
| 407 | JAK2 | PMF | ASXL1  | chr20:31023108  | G                 | T      | exonic   | p.E865X       | A | 48.01 |
| 407 | JAK2 | PMF | CBL    | chr11:119148875 | G                 | C      | splicing | .             | A | 27.26 |
| 407 | JAK2 | PMF | EZH2   | chr7:148515005  | CTTCT             | C      | exonic   | p.E401Kfs*21  | A | 89.07 |
| 407 | JAK2 | PMF | PHF6   | chrX:133547986  | A                 | G      | exonic   | p.Y240C       | A | 2.76  |
| 407 | JAK2 | PMF | PTPN11 | chr12:112888190 | A                 | T      | exonic   | p.E69V        | A | 9.0   |
| 407 | JAK2 | PMF | PTPN11 | chr12:112926887 | G                 | A      | exonic   | p.G503R       | A | 7.9   |
| 407 | JAK2 | PMF | RUNX1  | chr21:36164825  | T                 | TG     | exonic   | p.G351Rfs*248 | A | 6.02  |
| 407 | JAK2 | PMF | TET2   | chr4:106190866  | C                 | T      | exonic   | p.H1382Y      | A | 46.01 |

|     |      |     |        |                 |                       |     |          |               |   |       |
|-----|------|-----|--------|-----------------|-----------------------|-----|----------|---------------|---|-------|
| 407 | JAK2 | PMF | TET2   | chr4:106158412  | A                     | AT  | exonic   | p.E1106Rfs*22 | A | 2.86  |
| 407 | JAK2 | PMF | ZRSR2  | chrX:15836766   | G                     | A   | splicing | .             | B | 89.95 |
| 409 | JAK2 | SMF | CUX1   | chr7:101813732  | G                     | A   | exonic   | p.E255K       | C | 40.2  |
| 409 | JAK2 | SMF | U2AF1  | chr21:44514777  | T                     | G   | exonic   | p.Q157P       | A | 39.7  |
| 409 | JAK2 | SMF | SH2B3  | chr12:111855922 | G                     | T   | splicing | .             | B | 38.53 |
| 409 | JAK2 | SMF | SH2B3  | chr12:111885473 | C                     | A   | exonic   | p.S417X       | A | 38.15 |
| 409 | JAK2 | SMF | ASXL1  | chr20:31022263  | G                     | A   | exonic   | p.W583X       | A | 36.09 |
| 409 | JAK2 | SMF | TET2   | chr4:106196384  | CCCAATCCAGTTAGTCCTTAT | C   | exonic   | p.N1574Kfs*32 | A | 28.38 |
| 409 | JAK2 | SMF | MPL    | chr1:43818414   | C                     | G   | exonic   | p.L627V       | B | 14.4  |
| 412 | JAK2 | PMF | DNMT3A | chr2:25466772   | G                     | GC  | exonic   | p.A644Gfs*22  | A | 2.2   |
| 414 | CALR | PMF | CHEK2  | chr22:29107938  | T                     | A   | exonic   | p.I294F       | C | 46.87 |
| 414 | CALR | PMF | ASXL1  | chr20:31023144  | GAA                   | G   | exonic   | p.S878fs*     | A | 2.68  |
| 417 | JAK2 | PMF | ASXL1  | chr20:31022414  | T                     | TA  | exonic   | p.R634Kfs*22  | A | 13.19 |
| 417 | JAK2 | PMF | ASXL1  | chr20:31022853  | C                     | T   | exonic   | p.Q780X       | A | 4.88  |
| 417 | JAK2 | PMF | ATM    | chr11:108163438 | A                     | G   | exonic   | p.K1510R      | C | 54.63 |
| 417 | JAK2 | PMF | IDH1   | chr2:209113112  | C                     | T   | exonic   | p.R132H       | A | 15.08 |
| 417 | JAK2 | PMF | PTPN11 | chr12:112915818 | A                     | G   | exonic   | p.K364R       | C | 55.16 |
| 417 | JAK2 | PMF | TET2   | chr4:106156150  | G                     | T   | exonic   | p.E351X       | A | 3.17  |
| 417 | JAK2 | PMF | TET2   | chr4:106197285  | T                     | C   | exonic   | p.I1873T      | A | 2.85  |
| 421 | JAK2 | SMF | ASXL1  | chr20:31022415  | A                     | T   | exonic   | p.R634X       | A | 45.58 |
| 421 | JAK2 | SMF | ATM    | chr11:108170491 | A                     | G   | exonic   | p.I1686V      | C | 52.21 |
| 421 | JAK2 | SMF | ETNK1  | chr12:22811995  | A                     | T   | exonic   | p.N244I       | B | 36.94 |
| 421 | JAK2 | SMF | TET2   | chr4:106164778  | C                     | T   | exonic   | p.R1216X      | A | 2.2   |
| 425 | JAK2 | PMF | KMT2C  | chr7:151949698  | G                     | C   | exonic   | p.P468A       | C | 43.13 |
| 425 | JAK2 | PMF | NFE2   | chr12:54686494  | GCTCT                 | G   | exonic   | p.E261Afs*2   | A | 19.41 |
| 426 | JAK2 | PMF | ASXL1  | chr20:31022801  | GC                    | G   | exonic   | p.L764Yfs*7   | A | 43.93 |
| 426 | JAK2 | PMF | ETV6   | chr12:12038950  | C                     | CTT | exonic   | p.L416Ffs*5   | A | 40.0  |
| 426 | JAK2 | PMF | EZH2   | chr7:148526821  | TC                    | T   | exonic   | p.R161Kfs*5   | A | 38.88 |
| 426 | JAK2 | PMF | NRAS   | chr1:115256532  | C                     | T   | exonic   | p.G60E        | A | 43.99 |
| 426 | JAK2 | PMF | DOT1L  | chr19:2213960   | C                     | T   | exonic   | p.A591V       | C | 47.97 |
| 428 | JAK2 | SMF | ASXL1  | chr20:31022385  | G                     | GT  | exonic   | p.R625Pfs*9   | A | 3.09  |
| 428 | JAK2 | SMF | KMT2B  | chr19:36209047  | G                     | C   | exonic   | p.V43L        | C | 48.54 |
| 428 | JAK2 | SMF | NFE2   | chr12:54686736  | AGGGGTACTCCACT        | A   | exonic   | p.V178Tfs*23  | A | 2.69  |
| 428 | JAK2 | SMF | ZRSR2  | chrX:15833974   | G                     | GC  | exonic   | p.E246Rfs*42  | A | 2.37  |
| 429 | JAK2 | SMF | SF3B1  | chr2:198267491  | C                     | G   | exonic   | p.E622D       | A | 16.07 |
| 431 | JAK2 | PMF | ASXL1  | chr20:31022277  | C                     | T   | exonic   | p.Q588X       | A | 38.26 |

|     |      |     |        |                 |                          |    |          |                |   |       |
|-----|------|-----|--------|-----------------|--------------------------|----|----------|----------------|---|-------|
| 431 | JAK2 | PMF | ETV6   | chr12:11992163  | A                        | AC | exonic   | p.N85Tfs*3     | A | 46.61 |
| 431 | JAK2 | PMF | GATA2  | chr3:128200118  | CGAGTCT                  | C  | exonic   | p.Q394_T395del | C | 38.73 |
| 431 | JAK2 | PMF | SRSF2  | chr17:74732959  | G                        | C  | exonic   | p.P95R         | A | 49.16 |
| 435 | JAK2 | PMF | ASXL1  | chr20:31022441  | A                        | AG | exonic   | p.G646Wfs*12   | A | 28.42 |
| 435 | JAK2 | PMF | CBL    | chr11:119149251 | G                        | T  | exonic   | p.R420L        | A | 62.76 |
| 435 | JAK2 | PMF | CBL    | chr11:119142443 | A                        | G  | splicing | .              | B | 3.94  |
| 435 | JAK2 | PMF | GATA2  | chr3:128200031  | G                        | A  | exonic   | p.S425L        | C | 49.31 |
| 435 | JAK2 | PMF | TET2   | chr4:106157345  | AAATAAAG                 | A  | exonic   | p.N752Rfs*57   | A | 40.81 |
| 435 | JAK2 | PMF | U2AF1  | chr21:44514777  | T                        | G  | exonic   | p.Q157P        | A | 36.48 |
| 445 | JAK2 | SMF | ASXL1  | chr20:31022402  | TCACCACTGCCATAGAGAGGCGGC | T  | exonic   | p.E635Rfs*15   | A | 5.68  |
| 445 | JAK2 | SMF | ASXL1  | chr20:31022969  | G                        | GT | exonic   | p.G819Wfs*1    | A | 4.75  |
| 445 | JAK2 | SMF | CHEK2  | chr22:29092892  | T                        | C  | exonic   | p.I407M        | B | 2.12  |
| 445 | JAK2 | SMF | KMT2D  | chr12:49418493  | T                        | C  | splicing | .              | B | 16.49 |
| 445 | JAK2 | SMF | PPM1D  | chr17:58740374  | TG                       | T  | exonic   | p.W427Cfs*3    | A | 17.67 |
| 445 | JAK2 | SMF | SF3B1  | chr2:198267373  | G                        | C  | exonic   | p.H662D        | A | 15.08 |
| 445 | JAK2 | SMF | SH2B3  | chr12:111885204 | G                        | T  | exonic   | p.W364C        | B | 2.12  |
| 445 | JAK2 | SMF | TP53   | chr17:7577535   | C                        | A  | exonic   | p.R249M        | A | 35.07 |
| 447 | JAK2 | SMF | TET2   | chr4:106193892  | C                        | T  | exonic   | p.R1452X       | A | 48.43 |
| 447 | JAK2 | SMF | TP53   | chr17:7577580   | T                        | C  | exonic   | p.Y234C        | A | 36.48 |
| 447 | JAK2 | SMF | TP53   | chr17:7579316   | C                        | CA | exonic   | p.C124Lfs*24   | A | 30.99 |
| 447 | JAK2 | SMF | TP53   | chr17:7578394   | T                        | C  | exonic   | p.H179R        | A | 5.13  |
| 447 | JAK2 | SMF | TP53   | chr17:7579592   | T                        | A  | splicing | .              | A | 5.38  |
| 458 | JAK2 | PMF | KIT    | chr4:55599321   | AC                       | TA | exonic   | p.D816V        | A | 2.27  |
| 458 | JAK2 | PMF | KMT2B  | chr19:36212413  | C                        | T  | exonic   | p.H722Y        | C | 51.5  |
| 458 | JAK2 | PMF | SF3B1  | chr2:198267359  | C                        | A  | exonic   | p.K666N        | A | 45.53 |
| 458 | JAK2 | PMF | SRSF2  | chr17:74732959  | G                        | T  | exonic   | p.P95H         | A | 49.15 |
| 461 | JAK2 | PMF | ASXL1  | chr20:31021535  | C                        | T  | exonic   | p.Q512X        | A | 41.45 |
| 461 | JAK2 | PMF | EZH2   | chr7:148506219  | T                        | C  | exonic   | p.I713M        | B | 83.03 |
| 462 | JAK2 | PMF | ASXL1  | chr20:31024766  | AGG                      | A  | exonic   | p.G1418Efs*4   | A | 38.63 |
| 462 | JAK2 | PMF | NOTCH1 | chr9:139413934  | C                        | T  | exonic   | p.V276M        | C | 47.93 |
| 462 | JAK2 | PMF | RAD21  | chr8:117878925  | G                        | T  | exonic   | p.A15D         | C | 41.4  |
| 462 | JAK2 | PMF | SF3B1  | chr2:198266834  | T                        | C  | exonic   | p.K700E        | A | 46.0  |
| 462 | JAK2 | PMF | TET2   | chr4:106156454  | A                        | C  | exonic   | p.E452A        | C | 52.46 |
| 466 | CALR | PMF | ASXL1  | chr20:31022592  | C                        | T  | exonic   | p.R693X        | A | 30.65 |
| 466 | CALR | PMF | KMT2D  | chr12:49433769  | C                        | A  | exonic   | p.G2595V       | C | 47.39 |
| 466 | CALR | PMF | STAG1  | chr3:136349733  | G                        | C  | exonic   | p.T3S          | B | 34.44 |

|     |      |     |        |                 |    |       |        |              |   |       |
|-----|------|-----|--------|-----------------|----|-------|--------|--------------|---|-------|
| 466 | CALR | PMF | U2AF1  | chr21:44514777  | T  | C     | exonic | p.Q157R      | A | 41.31 |
| 468 | JAK2 | SMF | ETV6   | chr12:12037475  | G  | A     | exonic | p.R369Q      | A | 18.55 |
| 468 | JAK2 | SMF | NF1    | chr17:29588863  | A  | T     | exonic | p.E1571V     | B | 37.59 |
| 468 | JAK2 | SMF | SRSF2  | chr17:74733191  | C  | G     | exonic | p.V18L       | B | 39.82 |
| 468 | JAK2 | SMF | U2AF1  | chr21:44514777  | T  | C     | exonic | p.Q157R      | A | 35.41 |
| 469 | JAK2 | SMF | ATM    | chr11:108218030 | A  | G     | exonic | p.D2870G     | B | 31.66 |
| 470 | TN   | PMF | ASXL1  | chr20:31022441  | A  | AG    | exonic | p.G646Wfs*12 | A | 40.86 |
| 470 | TN   | PMF | CBL    | chr11:119148982 | G  | A     | exonic | p.C401Y      | A | 11.42 |
| 470 | TN   | PMF | NRAS   | chr1:115258744  | C  | A     | exonic | p.G13V       | A | 3.26  |
| 470 | TN   | PMF | SETBP1 | chr18:42531917  | T  | C     | exonic | p.I871T      | A | 48.19 |
| 470 | TN   | PMF | SRSF2  | chr17:74732959  | G  | T     | exonic | p.P95H       | A | 50.17 |
| 472 | DM   | SMF | ASXL1  | chr20:31022638  | A  | AGGCC | exonic | p.T711Rfs*7  | A | 44.74 |
| 472 | DM   | SMF | IDH2   | chr15:90631934  | C  | T     | exonic | p.R140Q      | A | 40.8  |
| 472 | DM   | SMF | KRAS   | chr12:25378561  | G  | A     | exonic | p.A146V      | A | 3.04  |
| 472 | DM   | SMF | SRSF2  | chr17:74732959  | G  | T     | exonic | p.P95H       | A | 47.38 |
| 473 | DM   | PMF | NF1    | chr17:29676224  | T  | G     | exonic | p.C2426G     | C | 51.11 |
| 473 | DM   | PMF | SF3B1  | chr2:198267359  | C  | A     | exonic | p.K666N      | A | 48.87 |
| 476 | JAK2 | PMF | ASXL1  | chr20:31022441  | A  | AG    | exonic | p.G646Wfs*12 | A | 6.73  |
| 476 | JAK2 | PMF | ASXL1  | chr20:31023408  | C  | T     | exonic | p.R965X      | A | 5.01  |
| 476 | JAK2 | PMF | RUNX1  | chr21:36231782  | C  | T     | exonic | p.R201Q      | A | 17.34 |
| 476 | JAK2 | PMF | RUNX1  | chr21:36231774  | G  | A     | exonic | p.R204X      | A | 4.36  |
| 476 | JAK2 | PMF | SRSF2  | chr17:74732959  | G  | C     | exonic | p.P95R       | A | 44.34 |
| 477 | CALR | PMF |        |                 |    |       |        | .            |   |       |
| 478 | JAK2 | PMF | ASXL1  | chr20:31023408  | C  | T     | exonic | p.R965X      | A | 32.93 |
| 478 | JAK2 | PMF | CBL    | chr11:119149297 | TC | T     | exonic | p.P436Lfs*7  | A | 33.24 |
| 479 | JAK2 | PMF | ASXL1  | chr20:31023717  | C  | T     | exonic | p.R1068X     | A | 12.61 |
| 479 | JAK2 | PMF | CBL    | chr11:119148991 | G  | A     | exonic | p.C404Y      | A | 30.34 |
| 479 | JAK2 | PMF | CUX1   | chr7:101821924  | AC | A     | exonic | p.N346Kfs*19 | A | 81.63 |
| 479 | JAK2 | PMF | SRSF2  | chr17:74732959  | G  | A     | exonic | p.P95L       | A | 40.97 |
| 479 | JAK2 | PMF | TET2   | chr4:106156963  | C  | T     | exonic | p.Q622X      | A | 44.7  |
| 479 | JAK2 | PMF | TET2   | chr4:106157053  | C  | T     | exonic | p.Q652X      | A | 39.8  |
| 480 | JAK2 | PMF | ATM    | chr11:108126966 | C  | T     | exonic | p.R717W      | C | 45.63 |
| 480 | JAK2 | PMF | KMT2D  | chr12:49425214  | G  | A     | exonic | p.A4425V     | C | 46.82 |
| 481 | CALR | PMF | BCOR   | chrX:39937172   | G  | T     | exonic | p.A4E        | C | 46.72 |
| 481 | CALR | PMF | SF3B1  | chr2:198267369  | G  | A     | exonic | p.T663I      | A | 43.03 |
| 482 | TN   | PMF |        |                 |    |       |        | .            |   |       |

|     |      |     |        |                 |                          |             |          |                   |   |       |
|-----|------|-----|--------|-----------------|--------------------------|-------------|----------|-------------------|---|-------|
| 483 | JAK2 | SMF | CHEK2  | chr22:29107953  | C                        | G           | exonic   | p.V289L           | C | 49.54 |
| 484 | JAK2 | PMF | ASXL1  | chr20:31022402  | TCACCACTGCCATAGAGAGGCGGC | T           | exonic   | p.E635Rfs*15      | A | 2.13  |
| 484 | JAK2 | PMF | DOT1L  | chr19:2222310   | A                        | C           | exonic   | p.T1048P          | C | 49.82 |
| 484 | JAK2 | PMF | SF3B1  | chr2:198266834  | T                        | C           | exonic   | p.K700E           | A | 40.83 |
| 485 | TN   | PMF | ASXL1  | chr20:31022441  | A                        | AG          | exonic   | p.G646Wfs*12      | A | 42.54 |
| 485 | TN   | PMF | ATRX   | chrX:76937603   | T                        | C           | exonic   | p.I1049V          | C | 53.5  |
| 485 | TN   | PMF | GNAS   | chr20:57484421  | G                        | A           | exonic   | p.R844H           | A | 45.77 |
| 485 | TN   | PMF | NF1    | chr17:29585419  | C                        | T           | exonic   | p.L1411F          | B | 6.31  |
| 485 | TN   | PMF | NRAS   | chr1:115258747  | C                        | T           | exonic   | p.G12D            | A | 2.27  |
| 485 | TN   | PMF | PTPN11 | chr12:112888165 | G                        | C           | exonic   | p.D61H            | A | 2.58  |
| 485 | TN   | PMF | SETBP1 | chr18:42531913  | G                        | A           | exonic   | p.G870S           | A | 52.41 |
| 485 | TN   | PMF | SRSF2  | chr17:74732959  | G                        | T           | exonic   | p.P95H            | A | 44.06 |
| 485 | TN   | PMF | TET2   | chr4:106157380  | C                        | CTTTT       | exonic   | p.P761Lfs*8       | A | 5.13  |
| 486 | JAK2 | PMF | TET2   | chr4:106157008  | G                        | A           | exonic   | p.E637K           | C | 43.86 |
| 487 | JAK2 | SMF | ASXL1  | chr20:31022441  | A                        | AG          | exonic   | p.G646Wfs*12      | A | 33.03 |
| 487 | JAK2 | SMF | ZBTB33 | chrX:119389013  | AAAG                     | A           | exonic   | p.K582_583delinsF | C | 42.01 |
| 488 | JAK2 | SMF | ASXL1  | chr20:31022487  | G                        | T           | exonic   | p.G658X           | A | 13.5  |
| 488 | JAK2 | SMF | ASXL1  | chr20:31024110  | G                        | A           | exonic   | p.A1199T          | C | 47.29 |
| 489 | JAK2 | PMF | NRAS   | chr1:115258745  | C                        | A           | exonic   | p.G13C            | A | 31.71 |
| 489 | JAK2 | PMF | MAD1L1 | chr7:1976371    | C                        | T           | exonic   | p.D587N           | C | 51.52 |
| 489 | JAK2 | PMF | EZH2   | chr7:148511085  | C                        | A           | exonic   | p.C606F           | B | 99.67 |
| 489 | JAK2 | PMF | SETBP1 | chr18:42531907  | G                        | A           | exonic   | p.D868N           | A | 35.57 |
| 489 | JAK2 | PMF | ASXL1  | chr20:31022234  | G                        | T           | splicing | .                 | C | 43.45 |
| 489 | JAK2 | PMF | SETBP1 | chr18:42531917  | T                        | C           | exonic   | p.I871T           | A | 5.66  |
| 491 | JAK2 | PMF | ASXL1  | chr20:31022402  | TCACCACTGCCATAGAGAGGCGGC | T           | exonic   | p.E635Rfs*15      | A | 26.17 |
| 491 | JAK2 | PMF | ATM    | chr11:108150304 | A                        | T           | exonic   | p.Y1124F          | C | 59.16 |
| 491 | JAK2 | PMF | CUX1   | chr7:101891949  | GC                       | G           | exonic   | p.P1394Rfs*101    | A | 27.1  |
| 491 | JAK2 | PMF | SRSF2  | chr17:74732959  | G                        | T           | exonic   | p.P95H            | A | 44.21 |
| 492 | JAK2 | SMF | NFE2   | chr12:54686494  | GCTCT                    | G           | exonic   | p.E261Afs*2       | A | 30.91 |
| 492 | JAK2 | SMF | PPM1D  | chr17:58740518  | G                        | T           | exonic   | p.E475X           | A | 2.33  |
| 493 | JAK2 | PMF | CBL    | chr11:119156182 | AC                       | A           | exonic   | p.R617Gfs*30      | A | 52.54 |
| 494 | TN   | PMF | DOT1L  | chr19:2220147   | C                        | T           | exonic   | p.S911L           | C | 49.33 |
| 495 | TN   | PMF | BCOR   | chrX:39921457   | T                        | A           | exonic   | p.R1455X          | A | 14.35 |
| 495 | TN   | PMF | MPL    | chr1:43814964   | T                        | TCCTTGGTGAC | exonic   | p.V501Lfs*45      | A | 31.37 |
| 495 | TN   | PMF | SETBP1 | chr18:42456684  | A                        | G           | exonic   | p.H232R†          | B | 4.5   |
| 496 | JAK2 | PMF | KRAS   | chr12:25378561  | G                        | A           | exonic   | p.A146V           | A | 2.25  |



|     |      |     |        |                 |                          |                                      |          |               |   |       |
|-----|------|-----|--------|-----------------|--------------------------|--------------------------------------|----------|---------------|---|-------|
| 497 | JAK2 | PMF | SF3B1  | chr2:198267360  | T                        | G                                    | exonic   | p.K666T       | A | 36.07 |
| 497 | JAK2 | PMF | KDM6A  | chrX:44911026   | G                        | T                                    | exonic   | p.A243S       | C | 100.0 |
| 498 | CALR | PMF | SETBP1 | chr18:42532832  | G                        | A                                    | exonic   | p.G1176D      | C | 47.56 |
| 498 | CALR | PMF | SRSF2  | chr17:74732959  | G                        | A                                    | exonic   | p.P95L        | A | 40.03 |
| 498 | CALR | PMF | TET2   | chr4:106157152  | C                        | T                                    | exonic   | p.Q685X       | A | 39.1  |
| 499 | CALR | SMF | ASXL1  | chr20:31023217  | TC                       | T                                    | exonic   | p.P902Hfs*4   | A | 44.27 |
| 499 | CALR | SMF | NRAS   | chr1:115258747  | C                        | T                                    | exonic   | p.G12D        | A | 4.79  |
| 499 | CALR | SMF | TET2   | chr4:106158051  | AC                       | A                                    | exonic   | p.P985Lfs*21  | A | 62.65 |
| 499 | CALR | SMF | ABL1   | chr9:133760618  | G                        | A                                    | exonic   | p.V1000I      | C | 46.45 |
| 499 | CALR | SMF | ASXL2  | chr2:25965152   | T                        | C                                    | exonic   | p.S1352G      | C | 48.02 |
| 500 | JAK2 | SMF | ASXL1  | chr20:31022402  | TCACCACTGCCATAGAGAGGCGGC | T                                    | exonic   | p.E635Rfs*15  | A | 20.17 |
| 500 | JAK2 | SMF | CHEK2  | chr22:29092930  | T                        | C                                    | exonic   | p.N395D       | B | 2.3   |
| 500 | JAK2 | SMF | KMT2A  | chr11:118344614 | G                        | C                                    | exonic   | p.E914Q       | C | 46.23 |
| 500 | JAK2 | SMF | TP53   | chr17:7578281   | G                        | T                                    | exonic   | p.P190T       | A | 3.15  |
| 501 | CALR | PMF | ASXL1  | chr20:31023573  | G                        | T                                    | exonic   | p.E1020X      | A | 3.21  |
| 502 | JAK2 | SMF | NFE2   | chr12:54686367  | G                        | A                                    | exonic   | p.R305W       | C | 39.75 |
| 502 | JAK2 | SMF | SUZ12  | chr17:30320955  | GAAGTGGCCGCAAACCTT       | G                                    | exonic   | p.N456Lfs*26  | A | 14.56 |
| 504 | JAK2 | PMF | ASXL1  | chr20:31022745  | G                        | T                                    | exonic   | p.G744X       | A | 39.08 |
| 504 | JAK2 | PMF | KMT2D  | chr12:49446482  | G                        | A                                    | exonic   | p.P375S       | C | 52.66 |
| 504 | JAK2 | PMF | SUZ12  | chr17:30302673  | C                        | G                                    | exonic   | p.T255S       | C | 48.14 |
| 504 | JAK2 | PMF | TET2   | chr4:106158401  | T                        | TCAATAATTTTATAGAGTCACCTTCC<br>AAATTA | exonic   | p.L1112Qfs*1  | A | 19.44 |
| 504 | JAK2 | PMF | U2AF1  | chr21:44524456  | G                        | A                                    | exonic   | p.S34F        | A | 37.46 |
| 506 | CALR | SMF | KMT2C  | chr7:151859375  | C                        | G                                    | exonic   | p.A3763P      | C | 48.76 |
| 506 | CALR | SMF | KMT2C  | chr7:152132852  | T                        | C                                    | exonic   | p.K7R         | C | 53.02 |
| 506 | CALR | SMF | NOTCH1 | chr9:139401831  | T                        | C                                    | exonic   | p.H1190R      | C | 47.39 |
| 506 | CALR | SMF | SETBP1 | chr18:42531659  | G                        | A                                    | exonic   | p.G785E       | C | 45.71 |
| 506 | CALR | SMF | SH2B3  | chr12:111884555 | A                        | C                                    | splicing | .             | B | 76.09 |
| 506 | CALR | SMF | TET2   | chr4:106197086  | G                        | A                                    | exonic   | p.D1807N      | C | 53.41 |
| 507 | JAK2 | PMF | TET2   | chr4:106196328  | CAG                      | C                                    | exonic   | p.E1555Vfs*21 | A | 27.04 |
| 507 | JAK2 | PMF | TET2   | chr4:106196726  | C                        | T                                    | exonic   | p.Q1687X      | A | 3.69  |
| 507 | JAK2 | PMF | TET2   | chr4:106164752  | A                        | C                                    | exonic   | p.E1207A      | B | 3.88  |
| 509 | JAK2 | SMF | SH2B3  | chr12:111885228 | G                        | GA                                   | exonic   | p.A374Sfs*10  | A | 95.8  |
| 509 | JAK2 | SMF | ASXL1  | chr20:31022441  | A                        | AG                                   | exonic   | p.G646Wfs*12  | A | 36.96 |
| 513 | MPL  | PMF | ATM    | chr11:108099943 | T                        | G                                    | exonic   | p.L75R        | C | 47.71 |
| 513 | MPL  | PMF | MPL    | chr1:43814979   | G                        | A                                    | exonic   | p.S505N       | A | 2.0   |

|     |      |     |        |                 |                          |                     |          |                    |   |       |
|-----|------|-----|--------|-----------------|--------------------------|---------------------|----------|--------------------|---|-------|
| 513 | MPL  | PMF | SRSF2  | chr17:74732959  | G                        | C                   | exonic   | p.P95R             | A | 43.25 |
| 513 | MPL  | PMF | STAG2  | chrX:123229240  | C                        | T                   | exonic   | p.R1242X           | A | 4.1   |
| 513 | MPL  | PMF | ZBTB33 | chrX:119388834  | T                        | G                   | exonic   | p.Y522D            | B | 2.46  |
| 516 | JAK2 | PMF | ASXL1  | chr20:31022441  | A                        | AG                  | exonic   | p.G646Wfs*12       | A | 36.58 |
| 516 | JAK2 | PMF | SRSF2  | chr17:74732959  | G                        | T                   | exonic   | p.P95H             | A | 45.09 |
| 518 | JAK2 | PMF | ASXL1  | chr20:31022402  | TCACCACTGCCATAGAGAGGCGGC | T                   | exonic   | p.E635Rfs*15       | A | 16.69 |
| 518 | JAK2 | PMF | CSF3R  | chr1:36945058   | G                        | C                   | exonic   | p.L14V             | C | 41.84 |
| 518 | JAK2 | PMF | ETNK1  | chr12:22811995  | A                        | G                   | exonic   | p.N244S            | A | 24.17 |
| 518 | JAK2 | PMF | KMT2D  | chr12:49434225  | C                        | T                   | exonic   | p.R2443H           | C | 50.38 |
| 518 | JAK2 | PMF | PHF6   | chrX:133511786  | G                        | GT                  | splicing | .                  | B | 6.72  |
| 518 | JAK2 | PMF | TP53   | chr17:7577538   | C                        | T                   | exonic   | p.R248Q            | A | 22.84 |
| 518 | JAK2 | PMF | U2AF1  | chr21:44514777  | T                        | G                   | exonic   | p.Q157P            | A | 28.55 |
| 520 | MPL  | PMF | ASXL1  | chr20:31023186  | G                        | GT                  | exonic   | p.S892Ffs*1        | A | 33.11 |
| 520 | MPL  | PMF | NRAS   | chr1:115258744  | C                        | T                   | exonic   | p.G13D             | A | 10.89 |
| 520 | MPL  | PMF | NRAS   | chr1:115258747  | C                        | A                   | exonic   | p.G12V             | A | 21.82 |
| 520 | MPL  | PMF | NRAS   | chr1:115258745  | C                        | A                   | exonic   | p.G13C             | A | 6.69  |
| 520 | MPL  | PMF | RUNX1  | chr21:36252974  | C                        | A                   | exonic   | p.V130F            | B | 9.97  |
| 520 | MPL  | PMF | SETBP1 | chr18:42618545  | G                        | A                   | exonic   | p.A1366T           | C | 46.93 |
| 520 | MPL  | PMF | SRSF2  | chr17:74732960  | G                        | C                   | exonic   | p.P95A             | A | 46.79 |
| 520 | MPL  | PMF | TET2   | chr4:106180899  | T                        | A                   | exonic   | p.F1309L           | A | 49.67 |
| 521 | JAK2 | PMF |        |                 |                          |                     |          | .                  |   |       |
| 522 | JAK2 | PMF | TET2   | chr4:106156889  | CCAAT                    | C                   | exonic   | p.N598Kfs*1        | A | 37.78 |
| 522 | JAK2 | PMF | NOTCH1 | chr9:139400161  | G                        | T                   | exonic   | p.P1396H           | C | 49.07 |
| 523 | JAK2 | PMF | ASXL1  | chr20:31022441  | A                        | AG                  | exonic   | p.G646Wfs*12       | A | 40.93 |
| 523 | JAK2 | PMF | IDH2   | chr15:90631935  | G                        | A                   | exonic   | p.R140W            | A | 46.63 |
| 523 | JAK2 | PMF | SRSF2  | chr17:74732959  | G                        | T                   | exonic   | p.P95H             | A | 48.3  |
| 524 | MPL  | PMF | NFE2   | chr12:54686918  | T                        | TG                  | exonic   | p.Q121Pfs*16       | A | 19.77 |
| 524 | MPL  | PMF | TET2   | chr4:106196819  | G                        | T                   | exonic   | p.V1718L           | A | 49.79 |
| 525 | JAK2 | PMF | EED    | chr11:85956306  | G                        | GAACAGACATGCCTGCGGC | exonic   | p.A18_K19insTDMCAA | C | 42.07 |
| 525 | JAK2 | PMF | TET2   | chr4:106197443  | C                        | T                   | exonic   | p.R1926C           | B | 38.12 |
| 525 | JAK2 | PMF | ZBTB33 | chrX:119388880  | G                        | A                   | exonic   | p.R537H            | B | 9.29  |
| 529 | JAK2 | SMF | DNMT3A | chr2:25469541   | C                        | T                   | exonic   | p.W409X            | A | 2.11  |
| 529 | JAK2 | SMF | JAK2   | chr9:5054646    | T                        | G                   | exonic   | p.F233C            | B | 20.18 |
| 529 | JAK2 | SMF | KMT2D  | chr12:49435056  | T                        | C                   | exonic   | p.Q2166R           | C | 47.53 |
| 529 | JAK2 | SMF | SH2B3  | chr12:111885467 | G                        | A                   | exonic   | p.R415H            | B | 2.53  |
| 530 | JAK2 | PMF |        |                 |                          |                     |          | .                  |   |       |

|     |      |     |         |                 |                          |       |        |                   |   |       |
|-----|------|-----|---------|-----------------|--------------------------|-------|--------|-------------------|---|-------|
| 532 | JAK2 | SMF | CTCF    | chr16:67654681  | G                        | A     | exonic | p.D390N           | A | 29.47 |
| 533 | CALR | PMF | ASXL1   | chr20:31022441  | A                        | AG    | exonic | p.G646Wfs*12      | A | 29.07 |
| 533 | CALR | PMF | IDH2    | chr15:90631935  | G                        | A     | exonic | p.R140W           | A | 32.87 |
| 533 | CALR | PMF | U2AF1   | chr21:44514777  | T                        | G     | exonic | p.Q157P           | A | 38.08 |
| 534 | JAK2 | PMF | BCORL1  | chrX:129147533  | C                        | T     | exonic | p.P262L           | C | 99.75 |
| 534 | JAK2 | PMF | KMT2B   | chr19:36211940  | G                        | A     | exonic | p.R564Q           | C | 55.62 |
| 534 | JAK2 | PMF | KMT2D   | chr12:49427305  | A                        | ins28 | exonic | p.R3727_M3728ins9 | C | 38.41 |
| 537 | DM   | SMF | ANKRD26 | chr10:27332401  | G                        | C     | exonic | p.Y705X           | A | 6.69  |
| 538 | CALR | SMF | DOT1L   | chr19:2226299   | C                        | T     | exonic | p.P1260L          | C | 48.99 |
| 538 | CALR | SMF | IDH2    | chr15:90631934  | C                        | T     | exonic | p.R140Q           | A | 3.91  |
| 538 | CALR | SMF | KMT2C   | chr7:151859518  | G                        | C     | exonic | p.T3715R          | C | 47.58 |
| 538 | CALR | SMF | KMT2D   | chr12:49433958  | G                        | A     | exonic | p.S2532F          | C | 49.12 |
| 539 | CALR | PMF | ASXL1   | chr20:31022402  | TCACCACTGCCATAGAGAGGCGGC | T     | exonic | p.E635Rfs*15      | A | 25.36 |
| 539 | CALR | PMF | KMT2D   | chr12:49431755  | G                        | C     | exonic | p.H3128Q          | C | 48.68 |
| 540 | JAK2 | SMF | TET2    | chr4:106157605  | AACAAT                   | A     | exonic | p.N837Tfs*6       | A | 18.19 |
| 543 | TN   | SMF | MPL     | chr1:43805160   | T                        | C     | exonic | p.S204P           | A | 63.05 |
| 543 | TN   | SMF | CTCF    | chr16:67650693  | C                        | T     | exonic | p.T333I           | C | 43.57 |
| 544 | JAK2 | PMF | RUNX1   | chr21:36164609  | C                        | G     | exonic | p.E422D           | B | 90.87 |
| 548 | CALR | SMF | ASXL1   | chr20:31022402  | TCACCACTGCCATAGAGAGGCGGC | T     | exonic | p.E635Rfs*15      | A | 17.5  |
| 548 | CALR | SMF | ASXL1   | chr20:31022471  | C                        | CG    | exonic | p.A654Gfs*2       | A | 7.9   |
| 548 | CALR | SMF | KMT2C   | chr7:151853341  | C                        | CTGG  | exonic | p.F3920_A3921insP | C | 48.16 |
| 548 | CALR | SMF | KMT2C   | chr7:151853343  | A                        | G     | exonic | p.F3920S          | C | 48.45 |
| 548 | CALR | SMF | SF3B1   | chr2:198267373  | G                        | C     | exonic | p.H662D           | A | 2.5   |
| 550 | JAK2 | PMF | ASXL1   | chr20:31022592  | C                        | T     | exonic | p.R693X           | A | 18.79 |
| 550 | JAK2 | PMF | ASXL1   | chr20:31024147  | ACTCC                    | A     | exonic | p.L1213Ifs*2      | A | 16.74 |
| 550 | JAK2 | PMF | MPL     | chr1:43818310   | G                        | A     | exonic | p.R592Q           | A | 39.05 |
| 550 | JAK2 | PMF | U2AF1   | chr21:44514777  | T                        | G     | exonic | p.Q157P           | A | 36.22 |
| 551 | JAK2 | SMF | SF3B1   | chr2:198267360  | T                        | C     | exonic | p.K666R           | A | 20.14 |
| 552 | CALR | PMF | ABL1    | chr9:133760739  | G                        | A     | exonic | p.R1040Q          | C | 50.71 |
| 552 | CALR | PMF | ATM     | chr11:108205732 | A                        | G     | exonic | p.I2683V          | C | 48.35 |
| 552 | CALR | PMF | DNMT3A  | chr2:25470582   | C                        | T     | exonic | p.G298R           | B | 33.41 |
| 552 | CALR | PMF | KMT2A   | chr11:118343916 | C                        | T     | exonic | p.P681L           | C | 50.89 |
| 556 | JAK2 | SMF | MPL     | chr1:43818305   | CTACCGAAGA               | C     | exonic | p.Y591_R593del    | B | 46.41 |
| 556 | JAK2 | SMF | KMT2B   | chr19:36213993  | G                        | T     | exonic | p.G940V           | C | 48.05 |
| 558 | JAK2 | PMF | ASXL1   | chr20:31022441  | A                        | AG    | exonic | p.G646Wfs*12      | A | 18.12 |

|     |      |     |             |                 |                          |    |        |                |   |       |
|-----|------|-----|-------------|-----------------|--------------------------|----|--------|----------------|---|-------|
| 558 | JAK2 | PMF | TET2        | chr4:106182955  | C                        | CT | exonic | p.M1333Yfs*4   | A | 3.67  |
| 558 | JAK2 | PMF | KMT2A       | chr11:118377354 | G                        | C  | exonic | p.G3583R       | C | 49.58 |
| 559 | JAK2 | PMF | ASXL1       | chr20:31022402  | TCACCACTGCCATAGAGAGGCGGC | T  | exonic | p.E635Rfs*15   | A | 20.0  |
| 559 | JAK2 | PMF | TP53        | chr17:7577517   | A                        | G  | exonic | p.I255T        | A | 6.84  |
| 559 | JAK2 | PMF | U2AF1       | chr21:44514777  | T                        | G  | exonic | p.Q157P        | A | 35.39 |
| 560 | JAK2 | PMF | ASXL1       | chr20:31022441  | A                        | AG | exonic | p.G646Wfs*12   | A | 19.47 |
| 560 | JAK2 | PMF | ASXL1       | chr20:31022649  | GC                       | G  | exonic | p.M713Cfs*11   | A | 5.07  |
| 560 | JAK2 | PMF | PTPN11      | chr12:112926248 | G                        | T  | exonic | p.A461S        | A | 2.68  |
| 560 | JAK2 | PMF | TP53        | chr17:7579367   | T                        | G  | exonic | p.Y107S        | B | 30.05 |
| 560 | JAK2 | PMF | U2AF1       | chr21:44514777  | T                        | C  | exonic | p.Q157R        | A | 28.6  |
| 561 | CALR | PMF | ASXL1       | chr20:31023427  | A                        | G  | exonic | p.N971S        | C | 47.29 |
| 561 | CALR | PMF | TET2        | chr4:106156072  | C                        | CA | exonic | p.S327Ifs*3    | A | 24.4  |
| 562 | JAK2 | SMF | SF3B1       | chr2:198266834  | T                        | C  | exonic | p.K700E        | A | 8.56  |
| 565 | JAK2 | PMF | ASXL1       | chr20:31022960  | G                        | GT | exonic | p.S816Ffs*4    | A | 34.43 |
| 565 | JAK2 | PMF | NOTCH1      | chr9:139403417  | C                        | T  | exonic | p.D1026N       | C | 48.9  |
| 565 | JAK2 | PMF | U2AF1       | chr21:44514777  | T                        | C  | exonic | p.Q157R        | A | 35.38 |
| 566 | JAK2 | PMF | ASXL1       | chr20:31022286  | T                        | TA | exonic | p.Y591fs*      | A | 41.62 |
| 566 | JAK2 | PMF | RUNX1       | chr21:36252959  | C                        | T  | exonic | p.G135S        | B | 2.83  |
| 566 | JAK2 | PMF | SRSF2       | chr17:74732959  | G                        | T  | exonic | p.P95H         | A | 47.69 |
| 568 | JAK2 | PMF | ATM         | chr11:108121752 | CAG                      | C  | exonic | p.E522Ifs*41   | A | 43.61 |
| 569 | JAK2 | SMF | IDH2        | chr15:90631934  | C                        | T  | exonic | p.R140Q        | A | 7.06  |
| 570 | CALR | PMF |             |                 |                          |    |        | .              |   |       |
| 571 | TN   | SMF | MPL         | chr1:43814967   | T                        | C  | exonic | p.V501A        | A | 32.35 |
| 571 | TN   | SMF | MPL         | chr1:43814979   | G                        | A  | exonic | p.S505N        | A | 31.8  |
| 571 | TN   | SMF | PPM1D       | chr17:58740532  | T                        | TA | exonic | p.A481Sfs*7    | A | 2.23  |
| 573 | TN   | PMF | ANKRD2<br>6 | chr10:27318243  | C                        | A  | exonic | p.A1284S       | C | 44.37 |
| 573 | TN   | PMF | ASXL1       | chr20:31022441  | A                        | AG | exonic | p.G646Wfs*12   | A | 42.28 |
| 573 | TN   | PMF | SRSF2       | chr17:74732959  | G                        | T  | exonic | p.P95H         | A | 41.25 |
| 573 | TN   | PMF | GATA2       | chr3:128200139  | TTCATGG                  | T  | exonic | p.T387_M388del | C | 34.66 |
| 573 | TN   | PMF | GATA2       | chr3:128204841  | A                        | AC | exonic | p.S201fs*      | A | 20.23 |
| 579 | JAK2 | PMF | GATA2       | chr3:128205787  | C                        | T  | exonic | p.A30T         | C | 49.42 |
| 579 | JAK2 | PMF | TET2        | chr4:106180880  | G                        | A  | exonic | p.S1303N       | C | 45.26 |
| 591 | JAK2 | SMF | KMT2A       | chr11:118374775 | T                        | C  | exonic | p.V2723A       | C | 51.92 |
| 591 | JAK2 | SMF | SUZ12       | chr17:30302634  | G                        | C  | exonic | p.S242T        | B | 37.62 |
| 591 | JAK2 | SMF | TP53        | chr17:7577570   | C                        | T  | exonic | p.M237I        | A | 11.62 |

|     |      |     |        |                 |                                |    |        |                  |   |       |
|-----|------|-----|--------|-----------------|--------------------------------|----|--------|------------------|---|-------|
| 592 | JAK2 | PMF | CHEK2  | chr22:29126509  | G                              | A  | exonic | p.S116F          | C | 51.11 |
| 592 | JAK2 | PMF | EED    | chr11:85956306  | G                              | C  | exonic | p.G12A           | C | 50.42 |
| 592 | JAK2 | PMF | MPL    | chr1:43818305   | CTACCGAAGA                     | C  | exonic | p.Y591_R593del   | B | 32.08 |
| 592 | JAK2 | PMF | PPM1D  | chr17:58740603  | CAACA                          | C  | exonic | p.N505Lfs*7      | A | 12.64 |
| 592 | JAK2 | PMF | PPM1D  | chr17:58740697  | TA                             | T  | exonic | p.R536Gfs*2      | A | 8.07  |
| 592 | JAK2 | PMF | TET2   | chr4:106158446  | TA                             | T  | exonic | p.N1118lfs*18    | A | 5.59  |
| 594 | JAK2 | PMF | NFE2   | chr12:54686465  | C                              | G  | exonic | p.R272P          | B | 38.63 |
| 595 | JAK2 | PMF | ATM    | chr11:108235940 | T                              | A  | exonic | p.N2994K         | C | 46.02 |
| 595 | JAK2 | PMF | IDH2   | chr15:90631934  | C                              | T  | exonic | p.R140Q          | A | 25.36 |
| 595 | JAK2 | PMF | SH2B3  | chr12:111856315 | G                              | C  | exonic | p.E122D          | C | 45.11 |
| 595 | JAK2 | PMF | SRSF2  | chr17:74732959  | G                              | T  | exonic | p.P95H           | A | 24.08 |
| 595 | JAK2 | PMF | TP53   | chr17:7576897   | G                              | A  | exonic | p.Q317X          | A | 9.17  |
| 598 | JAK2 | SMF | ASXL1  | chr20:31023542  | C                              | CA | exonic | p.T1010Nfs*5     | A | 40.65 |
| 598 | JAK2 | SMF | ASXL1  | chr20:31024141  | GT                             | G  | exonic | p.F1210Lfs*6     | A | 2.15  |
| 598 | JAK2 | SMF | IDH1   | chr2:209113113  | G                              | A  | exonic | p.R132C          | A | 40.54 |
| 598 | JAK2 | SMF | RUNX1  | chr21:36164597  | CGGCGGCGA                      | C  | exonic | p.S424Afs*172    | A | 64.37 |
| 599 | CALR | PMF | NFE2   | chr12:54686223  | G                              | A  | exonic | p.Q353X          | A | 5.36  |
| 599 | CALR | PMF | TET2   | chr4:106155317  | G                              | A  | exonic | p.R73H           | C | 47.96 |
| 599 | CALR | PMF | TET2   | chr4:106157404  | C                              | T  | exonic | p.Q769X          | A | 22.8  |
| 599 | CALR | PMF | TET2   | chr4:106190867  | A                              | G  | exonic | p.H1382R         | B | 13.05 |
| 601 | JAK2 | PMF | ASXL1  | chr20:31021276  | C                              | CA | exonic | p.Q428Tfs*9      | A | 44.89 |
| 601 | JAK2 | PMF | CUX1   | chr7:101891741  | C                              | T  | exonic | p.Q1324X         | A | 3.52  |
| 601 | JAK2 | PMF | ETNK1  | chr12:22811995  | A                              | G  | exonic | p.N244S          | A | 46.11 |
| 601 | JAK2 | PMF | SRSF2  | chr17:74732959  | G                              | T  | exonic | p.P95H           | A | 49.6  |
| 601 | JAK2 | PMF | ZBTB33 | chrX:119387502  | T                              | G  | exonic | p.F78V           | B | 93.27 |
| 603 | JAK2 | PMF | ASXL1  | chr20:31022441  | AGG                            | A  | exonic | p.G645Wfs*10     | A | 51.58 |
| 603 | JAK2 | PMF | U2AF1  | chr21:44514777  | T                              | G  | exonic | p.Q157P          | A | 43.09 |
| 604 | JAK2 | PMF | CHEK2  | chr22:29092948  | G                              | C  | exonic | p.R389G          | C | 49.24 |
| 605 | CALR | PMF | U2AF1  | chr21:44514777  | T                              | C  | exonic | p.Q157R          | A | 42.4  |
| 606 | CALR | PMF | ATM    | chr11:108188172 | T                              | C  | exonic | p.W2091R         | C | 42.56 |
| 606 | CALR | PMF | CSF3R  | chr1:36939399   | G                              | A  | exonic | p.H151Y          | C | 53.1  |
| 606 | CALR | PMF | EZH2   | chr7:148526844  | CATAATTTTTATTAGTTCCTCAATG<br>A | C  | exonic | p.F145fs*        | A | 4.31  |
| 607 | JAK2 | SMF | ASXL1  | chr20:31022441  | A                              | AG | exonic | p.G646Wfs*12     | A | 34.53 |
| 607 | JAK2 | SMF | CUX1   | chr7:101870919  | GT                             | TA | exonic | p.V1146_F1516del | A | 3.83  |
| 607 | JAK2 | SMF | SH2B3  | chr12:111856607 | G                              | A  | exonic | p.G220R          | B | 7.83  |

|     |      |     |             |                 |       |            |        |                     |   |       |
|-----|------|-----|-------------|-----------------|-------|------------|--------|---------------------|---|-------|
| 607 | JAK2 | SMF | TP53        | chr17:7578435   | CTGCT | C          | exonic | p.K164Sfs*4         | A | 2.33  |
| 607 | JAK2 | SMF | U2AF1       | chr21:44514777  | T     | G          | exonic | p.Q157P             | A | 39.48 |
| 607 | JAK2 | SMF | ZBTB33      | chrX:119388879  | C     | T          | exonic | p.R537C             | B | 2.23  |
| 608 | TN   | PMF | KMT2C       | chr7:151945166  | G     | T          | exonic | p.P785T             | B | 23.6  |
| 609 | JAK2 | PMF | ASXL1       | chr20:31022471  | C     | CG         | exonic | p.A654Gfs*2         | A | 32.32 |
| 609 | JAK2 | PMF | ATRX        | chrX:76849168   | T     | A          | exonic | p.K2036N            | B | 39.06 |
| 609 | JAK2 | PMF | IDH2        | chr15:90631935  | G     | C          | exonic | p.R140G             | A | 6.93  |
| 609 | JAK2 | PMF | PHF6        | chrX:133551266  | A     | G          | exonic | p.Y301C             | B | 38.32 |
| 609 | JAK2 | PMF | RUNX1       | chr21:36231773  | C     | T          | exonic | p.R204Q             | A | 34.19 |
| 609 | JAK2 | PMF | STAG2       | chrX:123197026  | G     | GA         | exonic | p.I599Nfs*32        | A | 15.72 |
| 609 | JAK2 | PMF | TET2        | chr4:106196819  | G     | T          | exonic | p.V1718L            | A | 50.32 |
| 609 | JAK2 | PMF | U2AF1       | chr21:44514777  | T     | G          | exonic | p.Q157P             | A | 34.79 |
| 610 | JAK2 | PMF | ASXL1       | chr20:31022441  | A     | AG         | exonic | p.G646Wfs*12        | A | 37.47 |
| 610 | JAK2 | PMF | SF3B1       | chr2:198265085  | T     | A          | exonic | p.Q931L             | C | 48.26 |
| 611 | JAK2 | PMF | NF1         | chr17:29667551  | G     | A          | exonic | p.W2317X            | A | 4.21  |
| 614 | JAK2 | SMF | ASXL1       | chr20:31022441  | A     | AG         | exonic | p.G646Wfs*12        | A | 32.85 |
| 614 | JAK2 | SMF | KMT2C       | chr7:151859235  | TTTA  | T          | exonic | p.N3808del          | C | 44.23 |
| 614 | JAK2 | SMF | ZBTB33      | chrX:119388912  | C     | G          | exonic | p.R548G             | B | 3.1   |
| 615 | JAK2 | PMF | ASXL1       | chr20:31022592  | C     | T          | exonic | p.R693X             | A | 35.72 |
| 615 | JAK2 | PMF | TP53        | chr17:7578244   | C     | T          | exonic | p.R202H             | C | 48.67 |
| 615 | JAK2 | PMF | U2AF1       | chr21:44514777  | T     | G          | exonic | p.Q157P             | A | 33.28 |
| 616 | JAK2 | PMF | RUNX1       | chr21:36252940  | G     | A          | exonic | p.S141L             | A | 44.46 |
| 616 | JAK2 | PMF | SRSF2       | chr17:74732959  | G     | C          | exonic | p.P95R              | A | 43.07 |
| 616 | JAK2 | PMF | TET2        | chr4:106197024  | AGAAT | A          | exonic | p.N1787Tfs*31       | A | 22.71 |
| 617 | DM   | SMF | NFE2        | chr12:54686714  | A     | T          | exonic | p.L189X             | A | 4.54  |
| 617 | DM   | SMF | STAG2       | chrX:123215311  | C     | G          | exonic | p.R953G             | B | 15.27 |
| 617 | DM   | SMF | TET2        | chr4:106196234  | C     | T          | exonic | p.Q1523X            | A | 31.03 |
| 617 | DM   | SMF | TET2        | chr4:106164000  | GAA   | G          | exonic | p.K1171Gfs*1        | A | 3.94  |
| 617 | DM   | SMF | TET2        | chr4:106197383  | A     | AGCATGAATG | exonic | p.N1908_E1909insGMN | B | 6.83  |
| 618 | JAK2 | PMF | ANKRD2<br>6 | chr10:27318269  | T     | C          | exonic | p.D1275G            | C | 46.83 |
| 618 | JAK2 | PMF | CBL         | chr11:119148486 | C     | T          | exonic | p.R343X             | A | 40.66 |
| 618 | JAK2 | PMF | CUX1        | chr7:101840010  | A     | C          | exonic | p.E451A             | C | 49.13 |
| 618 | JAK2 | PMF | KMT2A       | chr11:118352592 | C     | G          | exonic | p.P1266R            | C | 45.03 |
| 618 | JAK2 | PMF | KMT2D       | chr12:49443672  | C     | G          | exonic | p.E1233D            | C | 50.01 |
| 618 | JAK2 | PMF | KRAS        | chr12:25378561  | G     | A          | exonic | p.A146V             | A | 2.24  |

|     |      |     |        |                 |                          |    |          |                     |   |       |
|-----|------|-----|--------|-----------------|--------------------------|----|----------|---------------------|---|-------|
| 618 | JAK2 | PMF | RUNX1  | chr21:36206893  | G                        | A  | exonic   | p.R207W             | C | 47.01 |
| 618 | JAK2 | PMF | SRSF2  | chr17:74732959  | G                        | T  | exonic   | p.P95H              | A | 44.04 |
| 618 | JAK2 | PMF | TET2   | chr4:106156357  | TCAGAAGGAAAAAGC          | T  | exonic   | p.S420Yfs*17        | A | 37.05 |
| 618 | JAK2 | PMF | TET2   | chr4:106197244  | TG                       | T  | exonic   | p.G1861Efs*25       | A | 44.52 |
| 626 | JAK2 | PMF | NRAS   | chr1:115258747  | C                        | T  | exonic   | p.G12D              | A | 10.99 |
| 626 | JAK2 | PMF | SRSF2  | chr17:74733073  | A                        | T  | exonic   | p.F57Y              | B | 43.34 |
| 626 | JAK2 | PMF | TET2   | chr4:106156432  | CT                       | C  | exonic   | p.L446fs*           | A | 40.06 |
| 626 | JAK2 | PMF | TET2   | chr4:106157942  | AG                       | A  | exonic   | p.K948Nfs*4         | A | 44.57 |
| 627 | JAK2 | PMF | DNMT3A | chr2:25457243   | G                        | A  | exonic   | p.R882C             | A | 47.17 |
| 627 | JAK2 | PMF | GATA2  | chr3:128200136  | TTCTTCATGGTCAGTG         | T  | exonic   | p.P385_E391delinsQQ | B | 10.95 |
| 627 | JAK2 | PMF | SRSF2  | chr17:74732235  | C                        | A  | splicing | .                   | B | 90.88 |
| 627 | JAK2 | PMF | SETBP1 | chr18:42531913  | G                        | A  | exonic   | p.G870S             | A | 33.3  |
| 627 | JAK2 | PMF | BCOR   | chrX:39930346   | CTT                      | C  | exonic   | p.K1039Rfs*38       | A | 7.02  |
| 629 | JAK2 | SMF | ASXL1  | chr20:31022402  | TCACCACTGCCATAGAGAGGCGGC | T  | exonic   | p.E635Rfs*15        | A | 27.66 |
| 629 | JAK2 | SMF | STAG2  | chrX:123215324  | T                        | C  | exonic   | p.L957S             | B | 4.97  |
| 629 | JAK2 | SMF | ZRSR2  | chrX:15836765   | C                        | A  | exonic   | p.S276X             | A | 72.89 |
| 633 | MPL  | SMF | KMT2D  | chr12:49428219  | G                        | A  | exonic   | p.P3494L            | C | 52.88 |
| 633 | MPL  | SMF | TET2   | chr4:106182956  | T                        | A  | exonic   | p.L1332H            | C | 48.52 |
| 634 | JAK2 | PMF | ASXL1  | chr20:31022441  | A                        | AG | exonic   | p.G646Wfs*12        | A | 38.78 |
| 634 | JAK2 | PMF | IDH1   | chr2:209113112  | C                        | T  | exonic   | p.R132H             | A | 47.51 |
| 634 | JAK2 | PMF | PTPN11 | chr12:112910785 | G                        | A  | exonic   | p.R265Q             | C | 47.41 |
| 634 | JAK2 | PMF | SRSF2  | chr17:74732959  | G                        | A  | exonic   | p.P95L              | A | 48.59 |
| 639 | JAK2 | PMF | ASXL1  | chr20:31022619  | CT                       | TA | exonic   | p.L702*             | A | 35.08 |
| 639 | JAK2 | PMF | RUNX1  | chr21:36231786  | G                        | A  | exonic   | p.P200S             | A | 33.5  |
| 639 | JAK2 | PMF | TET2   | chr4:106155579  | T                        | TA | exonic   | p.D162Rfs*8         | A | 11.04 |
| 639 | JAK2 | PMF | TET2   | chr4:106197357  | T                        | G  | exonic   | p.I1897S            | B | 34.36 |
| 639 | JAK2 | PMF | TET2   | chr4:106156768  | C                        | T  | exonic   | p.Q557X             | A | 6.33  |
| 639 | JAK2 | PMF | TET2   | chr4:106196427  | A                        | AT | exonic   | p.I1588Yfs*25       | A | 2.03  |
| 639 | JAK2 | PMF | U2AF1  | chr21:44514777  | T                        | G  | exonic   | p.Q157P             | A | 33.87 |
| 641 | CALR | PMF | FLT3   | chr13:28608321  | C                        | T  | exonic   | p.V579I             | C | 50.36 |
| 642 | JAK2 | SMF | GNAS   | chr20:57430127  | C                        | T  | exonic   | p.P603S             | C | 50.28 |
| 643 | JAK2 | SMF | PPM1D  | chr17:58740724  | T                        | TG | exonic   | p.L546Pfs*5         | A | 23.13 |
| 643 | JAK2 | SMF | SMC1A  | chrX:53436435   | C                        | G  | splicing | .                   | B | 14.19 |
| 655 | MPL  | PMF | ASXL1  | chr20:31022402  | TCACCACTGCCATAGAGAGGCGGC | T  | exonic   | p.E635Rfs*15        | A | 2.38  |
| 655 | MPL  | PMF | ATM    | chr11:108201008 | C                        | G  | exonic   | p.R2459G            | C | 46.48 |
| 655 | MPL  | PMF | CSF3R  | chr1:36932041   | C                        | T  | exonic   | p.D837N             | C | 93.16 |

|     |      |     |             |                 |                         |         |          |                  |   |       |
|-----|------|-----|-------------|-----------------|-------------------------|---------|----------|------------------|---|-------|
| 655 | MPL  | PMF | JAK2        | chr9:5054842    | G                       | C       | exonic   | p.W298C          | C | 51.09 |
| 656 | CALR | PMF | MPL         | chr1:43805106   | C                       | G       | exonic   | p.Q186E          | C | 48.75 |
| 657 | JAK2 | PMF | ANKRD2<br>6 | chr10:27303570  | A                       | G       | exonic   | p.M1526T         | B | 31.85 |
| 657 | JAK2 | PMF | ASXL1       | chr20:31022441  | A                       | AG      | exonic   | p.G646Wfs*12     | A | 2.22  |
| 657 | JAK2 | PMF | KMT2B       | chr19:36213533  | C                       | G       | exonic   | p.L879V          | C | 49.39 |
| 657 | JAK2 | PMF | ZBTB33      | chrX:119388568  | T                       | G       | exonic   | p.V433G          | B | 2.51  |
| 658 | JAK2 | SMF | TET2        | chr4:106156686  | CCAGCAGTTGATGAGAAA      | C       | exonic   | p.Q531Rfs*29     | A | 16.37 |
| 658 | JAK2 | SMF | TET2        | chr4:106156747  | C                       | T       | exonic   | p.R550X          | A | 47.48 |
| 660 | JAK2 | PMF | ASXL1       | chr20:31022402  | TCACCACTGCCATAGAGAGCGGC | T       | exonic   | p.E635Rfs*15     | A | 22.7  |
| 661 | CALR | SMF | GATA2       | chr3:128205200  | C                       | G       | exonic   | p.G81R           | C | 51.35 |
| 661 | CALR | SMF | ASXL1       | chr20:31022441  | A                       | AG      | exonic   | p.G646Wfs*12     | A | 36.55 |
| 662 | JAK2 | SMF | PPM1D       | chr17:58740375  | G                       | A       | exonic   | p.W427X          | A | 2.51  |
| 662 | JAK2 | SMF | SF3B1       | chr2:198267360  | T                       | G       | exonic   | p.K666T          | A | 46.31 |
| 663 | JAK2 | PMF | KMT2B       | chr19:36218848  | C                       | T       | exonic   | p.R1487C         | C | 47.9  |
| 663 | JAK2 | PMF | TET2        | chr4:106156478  | C                       | T       | exonic   | p.S460F          | A | 45.31 |
| 664 | JAK2 | PMF | ASXL1       | chr20:31024314  | ACTAC                   | A       | exonic   | p.T1268Rfs*10    | A | 37.53 |
| 664 | JAK2 | PMF | CBL         | chr11:119158656 | GGT                     | G       | splicing | .                | B | 24.21 |
| 664 | JAK2 | PMF | U2AF1       | chr21:44514769  | T                       | TCTCATA | exonic   | p.E159_M160insYE | B | 37.96 |
| 665 | CALR | PMF | TET2        | chr4:106162579  | G                       | A       | exonic   | p.E1165K         | B | 3.56  |
| 665 | CALR | PMF | ZBTB33      | chrX:119388357  | C                       | CA      | exonic   | p.N364Kfs*4      | A | 4.6   |
| 666 | TN   | PMF | ASXL1       | chr20:31022441  | A                       | AG      | exonic   | p.G646Wfs*12     | A | 10.44 |
| 666 | TN   | PMF | CUX1        | chr7:101821905  | C                       | T       | exonic   | p.Q340X          | A | 2.84  |
| 666 | TN   | PMF | U2AF1       | chr21:44514777  | T                       | C       | exonic   | p.Q157R          | A | 40.57 |
| 666 | TN   | PMF | ZRSR2       | chrX:15821920   | G                       | A       | splicing | .                | B | 26.46 |
| 667 | JAK2 | SMF | NFE2        | chr12:54686387  | A                       | G       | exonic   | p.L298P          | B | 2.2   |
| 667 | JAK2 | SMF | NFE2        | chr12:54686425  | CT                      | C       | exonic   | p.K285Rfs*16     | A | 3.93  |
| 668 | JAK2 | SMF | ASXL1       | chr20:31022283  | ACTTAC                  | A       | exonic   | p.Y591Dfs*25     | A | 45.26 |
| 668 | JAK2 | SMF | EZH2        | chr7:148507440  | A                       | C       | exonic   | p.F672V          | C | 41.58 |
| 668 | JAK2 | SMF | MAD1L1      | chr7:2265101    | T                       | G       | exonic   | p.K79Q           | C | 48.38 |
| 668 | JAK2 | SMF | STAG2       | chrX:123171388  | T                       | A       | exonic   | p.D100E          | C | 44.92 |
| 669 | JAK2 | SMF | ASXL1       | chr20:31022441  | A                       | AG      | exonic   | p.G646Wfs*12     | A | 27.22 |
| 669 | JAK2 | SMF | ATM         | chr11:108201125 | T                       | G       | exonic   | p.S2498A         | C | 48.09 |
| 670 | JAK2 | PMF | ASXL1       | chr20:31022439  | G                       | T       | exonic   | p.G642X          | A | 43.83 |
| 670 | JAK2 | PMF | CUX1        | chr7:101747740  | G                       | A       | splicing | .                | C | 44.53 |
| 670 | JAK2 | PMF | SRSF2       | chr17:74732959  | G                       | T       | exonic   | p.P95H           | A | 46.29 |



|     |      |     |        |                 |                       |    |          |                |   |       |
|-----|------|-----|--------|-----------------|-----------------------|----|----------|----------------|---|-------|
| 670 | JAK2 | PMF | TET2   | chr4:106156091  | T                     | TA | exonic   | p.C332Mfs*7    | A | 46.86 |
| 670 | JAK2 | PMF | TET2   | chr4:106190860  | C                     | T  | exonic   | p.H1380Y       | A | 46.54 |
| 671 | JAK2 | PMF | NFE2   | chr12:54686379  | GCCGCTCCAGCTC         | G  | exonic   | p.E297_R300del | B | 35.13 |
| 671 | JAK2 | PMF | TET2   | chr4:106197391  | TG                    | T  | exonic   | p.E1909Sfs*40  | A | 37.78 |
| 671 | JAK2 | PMF | TET2   | chr4:106157603  | C                     | A  | exonic   | p.S835X        | A | 2.77  |
| 671 | JAK2 | PMF | TET2   | chr4:106197205  | CT                    | C  | exonic   | p.W1847Gfs*39  | A | 2.33  |
| 672 | CALR | PMF | ABL1   | chr9:133759722  | G                     | A  | exonic   | p.R701Q        | C | 48.82 |
| 672 | CALR | PMF | BCORL1 | chrX:129149677  | G                     | A  | exonic   | p.A977T        | C | 100.0 |
| 672 | CALR | PMF | CHEK2  | chr22:29083920  | TG                    | T  | exonic   | p.T576Qfs*31   | A | 46.81 |
| 672 | CALR | PMF | EED    | chr11:85979543  | A                     | T  | exonic   | p.R302S        | B | 8.93  |
| 677 | JAK2 | SMF |        |                 |                       |    |          | .              |   |       |
| 679 | MPL  | PMF | ASXL1  | chr20:31022441  | A                     | AG | exonic   | p.G646Wfs*12   | A | 39.13 |
| 679 | MPL  | PMF | ATM    | chr11:108121708 | G                     | T  | exonic   | p.G506C        | C | 46.21 |
| 679 | MPL  | PMF | FLT3   | chr13:28611330  | T                     | C  | exonic   | p.N434S        | C | 48.69 |
| 679 | MPL  | PMF | KMT2C  | chr7:151860675  | C                     | T  | exonic   | p.M3329I       | C | 48.71 |
| 679 | MPL  | PMF | TET2   | chr4:106180865  | G                     | A  | exonic   | p.C1298Y       | A | 45.31 |
| 681 | MPL  | PMF | ASXL1  | chr20:31022592  | C                     | T  | exonic   | p.R693X        | A | 2.43  |
| 681 | MPL  | PMF | DNMT3A | chr2:25471026   | AGGAGGGCTGGCCTCCTCCAC | A  | exonic   | p.V239Cfs*6    | A | 6.36  |
| 681 | MPL  | PMF | SRSF2  | chr17:74732956  | G                     | T  | exonic   | p.P96Q         | B | 6.49  |
| 681 | MPL  | PMF | TET2   | chr4:106157288  | CA                    | C  | exonic   | p.Q731Nfs*19   | A | 6.91  |
| 682 | JAK2 | SMF | BCORL1 | chrX:129189828  | G                     | T  | splicing | .              | B | 2.02  |
| 682 | JAK2 | SMF | IKZF1  | chr7:50468071   | G                     | C  | exonic   | p.D436H        | C | 49.39 |
| 682 | JAK2 | SMF | NFE2   | chr12:54686494  | GCTCT                 | G  | exonic   | p.E261Afs*2    | A | 38.73 |
| 682 | JAK2 | SMF | NOTCH1 | chr9:139407973  | C                     | G  | exonic   | p.D742H        | B | 4.14  |
| 682 | JAK2 | SMF | PPM1D  | chr17:58740375  | G                     | A  | exonic   | p.W427X        | A | 4.37  |
| 682 | JAK2 | SMF | SH2B3  | chr12:111884630 | C                     | CT | exonic   | p.D270fs*      | A | 5.31  |
| 682 | JAK2 | SMF | TET2   | chr4:106194076  | G                     | A  | splicing | .              | B | 38.58 |
| 682 | JAK2 | SMF | TP53   | chr17:7578190   | T                     | C  | exonic   | p.Y220C        | A | 5.12  |
| 682 | JAK2 | SMF | TP53   | chr17:7578503   | C                     | T  | exonic   | p.V143M        | A | 4.34  |
| 683 | JAK2 | PMF | ASXL1  | chr20:31022441  | A                     | AG | exonic   | p.G646Wfs*12   | A | 43.21 |
| 683 | JAK2 | PMF | ATRX   | chrX:76953070   | C                     | T  | splicing | .              | B | 92.52 |
| 683 | JAK2 | PMF | CUX1   | chr7:101839971  | C                     | T  | exonic   | p.P438L        | C | 46.04 |
| 683 | JAK2 | PMF | EZH2   | chr7:148516705  | G                     | A  | exonic   | p.Q328X        | A | 45.19 |
| 683 | JAK2 | PMF | SETBP1 | chr18:42531917  | T                     | C  | exonic   | p.I871T        | A | 47.5  |
| 684 | JAK2 | PMF | SH2B3  | chr12:111856134 | T                     | G  | exonic   | p.L62R         | C | 52.11 |
| 684 | JAK2 | PMF | SETBP1 | chr18:42618534  | A                     | G  | exonic   | p.K1362R       | C | 49.33 |

|     |      |     |        |                 |    |                |          |                 |   |       |
|-----|------|-----|--------|-----------------|----|----------------|----------|-----------------|---|-------|
| 684 | JAK2 | PMF | U2AF1  | chr21:44514666  | T  | TGCA           | exonic   | p.C163_T164insC | B | 9.64  |
| 684 | JAK2 | PMF | IKZF1  | chr7:50450366   | CG | C              | exonic   | p.R185Gfs*7     | A | 8.34  |
| 684 | JAK2 | PMF | EZH2   | chr7:148508777  | C  | T              | exonic   | p.W629X         | A | 5.54  |
| 684 | JAK2 | PMF | TP53   | chr17:7577139   | G  | A              | exonic   | p.R267W         | A | 6.92  |
| 684 | JAK2 | PMF | ASXL1  | chr20:31022540  | T  | TGA            | exonic   | p.P677Sfs*26    | A | 2.88  |
| 685 | TN   | PMF |        |                 |    |                |          | .               |   |       |
| 686 | JAK2 | SMF | ASXL1  | chr20:31022441  | A  | AG             | exonic   | p.G646Wfs*12    | A | 9.11  |
| 686 | JAK2 | SMF | CBL    | chr11:119149251 | G  | A              | exonic   | p.R420Q         | A | 23.96 |
| 686 | JAK2 | SMF | CUX1   | chr7:101847837  | G  | A              | splicing | .               | B | 16.9  |
| 686 | JAK2 | SMF | EZH2   | chr7:148526858  | A  | G              | exonic   | p.L149P         | A | 11.53 |
| 686 | JAK2 | SMF | MPL    | chr1:43812193   | A  | G              | exonic   | p.H353R         | C | 52.99 |
| 686 | JAK2 | SMF | STAG2  | chrX:123197048  | T  | G              | exonic   | p.L605X         | A | 8.8   |
| 686 | JAK2 | SMF | ZBTB33 | chrX:119387326  | T  | C              | exonic   | p.L19P          | B | 10.37 |
| 686 | JAK2 | SMF | ZBTB33 | chrX:119388891  | G  | A              | exonic   | p.E541K         | B | 2.82  |
| 687 | JAK2 | SMF | EZH2   | chr7:148526913  | T  | A              | exonic   | p.I131F         | A | 2.39  |
| 687 | JAK2 | SMF | JAK2   | chr9:5054810    | A  | G              | exonic   | p.I288V         | C | 59.18 |
| 687 | JAK2 | SMF | TET2   | chr4:106164022  | G  | T              | exonic   | p.E1178X        | A | 2.66  |
| 689 | JAK2 | PMF | TET2   | chr4:106196819  | G  | T              | exonic   | p.V1718L        | A | 49.47 |
| 689 | JAK2 | PMF | U2AF1  | chr21:44514777  | T  | G              | exonic   | p.Q157P         | A | 16.99 |
| 693 | JAK2 | PMF | DNMT3A | chr2:25463248   | G  | A              | exonic   | p.R749C         | A | 14.0  |
| 693 | JAK2 | PMF | TET2   | chr4:106190860  | C  | T              | exonic   | p.H1380Y        | A | 7.61  |
| 694 | JAK2 | PMF | ASXL1  | chr20:31024011  | A  | AGCCCCAGTTCTTT | exonic   | p.R1171Pfs*13   | A | 5.32  |
| 694 | JAK2 | PMF | KMT2C  | chr7:151970884  | A  | C              | exonic   | p.Y306X         | A | 4.5   |
| 694 | JAK2 | PMF | SF3B1  | chr2:198266834  | T  | C              | exonic   | p.K700E         | A | 35.47 |
| 698 | JAK2 | PMF | ASXL1  | chr20:31022909  | TG | T              | exonic   | p.D799Mfs*18    | A | 33.8  |
| 698 | JAK2 | PMF | ASXL1  | chr20:31022592  | C  | T              | exonic   | p.R693X         | A | 2.5   |
| 698 | JAK2 | PMF | DNMT3A | chr2:25457243   | G  | A              | exonic   | p.R882C         | A | 43.46 |
| 698 | JAK2 | PMF | EZH2   | chr7:148526877  | C  | A              | exonic   | p.G143C         | B | 30.2  |
| 698 | JAK2 | PMF | U2AF1  | chr21:44514777  | T  | C              | exonic   | p.Q157R         | A | 37.65 |
| 699 | JAK2 | SMF | DNMT3A | chr2:25463283   | A  | C              | exonic   | p.L737R         | A | 6.82  |
| 699 | JAK2 | SMF | NOTCH1 | chr9:139411817  | C  | G              | exonic   | p.E488Q         | C | 50.48 |
| 699 | JAK2 | SMF | TET2   | chr4:106164751  | G  | T              | exonic   | p.E1207X        | A | 14.6  |
| 699 | JAK2 | SMF | TET2   | chr4:106155781  | A  | T              | exonic   | p.K228X         | A | 4.95  |
| 699 | JAK2 | SMF | TET2   | chr4:106157986  | C  | T              | exonic   | p.Q963X         | A | 3.7   |
| 699 | JAK2 | SMF | TET2   | chr4:106190905  | G  | A              | splicing | .               | B | 7.32  |
| 708 | JAK2 | PMF | ASXL1  | chr20:31022441  | A  | AG             | exonic   | p.G646Wfs*12    | A | 41.04 |

|     |      |     |        |                 |                          |                       |          |                       |   |       |
|-----|------|-----|--------|-----------------|--------------------------|-----------------------|----------|-----------------------|---|-------|
| 708 | JAK2 | PMF | EZH2   | chr7:148504799  | C                        | A                     | splicing | .                     | C | 46.49 |
| 708 | JAK2 | PMF | GATA2  | chr3:128200137  | T                        | C                     | exonic   | p.K390E               | A | 40.97 |
| 708 | JAK2 | PMF | PHF6   | chrX:133551224  | G                        | A                     | exonic   | p.G287D               | B | 85.42 |
| 709 | JAK2 | PMF | ASXL1  | chr20:31022415  | AGAGAGGCGGCCACCACTGCCATC | A                     | exonic   | p.E635Rfs*13          | A | 5.81  |
| 709 | JAK2 | PMF | CBL    | chr11:119149251 | G                        | C                     | exonic   | p.R420P               | A | 2.83  |
| 709 | JAK2 | PMF | GATA1  | chrX:48650332   | C                        | T                     | exonic   | p.T101M               | C | 99.62 |
| 709 | JAK2 | PMF | IDH2   | chr15:90631934  | C                        | T                     | exonic   | p.R140Q               | A | 8.7   |
| 725 | JAK2 | PMF | ASXL1  | chr20:31022390  | A                        | AG                    | exonic   | p.A627Gfs*7           | A | 40.92 |
| 725 | JAK2 | PMF | IDH1   | chr2:209113112  | C                        | T                     | exonic   | p.R132H               | A | 37.89 |
| 725 | JAK2 | PMF | U2AF1  | chr21:44514777  | T                        | G                     | exonic   | p.Q157P               | A | 42.68 |
| 726 | JAK2 | PMF | BCOR   | chrX:39932326   | G                        | T                     | exonic   | p.P758Q               | C | 45.99 |
| 732 | JAK2 | SMF | CHEK2  | chr22:29091856  | AG                       | A                     | exonic   | p.T410Mfs*14          | A | 47.68 |
| 732 | JAK2 | SMF | KMT2D  | chr12:49443805  | C                        | T                     | exonic   | p.R1189H              | C | 46.93 |
| 732 | JAK2 | SMF | NF1    | chr17:29556306  | CA                       | C                     | exonic   | p.S892Afs*9           | A | 2.59  |
| 737 | JAK2 | PMF | TET2   | chr4:106182972  | T                        | A                     | exonic   | p.Y1337X              | A | 68.13 |
| 737 | JAK2 | PMF | NFE2   | chr12:54686468  | C                        | G                     | exonic   | p.R271P               | B | 38.84 |
| 742 | JAK2 | PMF | DOT1L  | chr19:2226273   | C                        | G                     | exonic   | p.I1251M              | C | 51.84 |
| 742 | JAK2 | PMF | SH2B3  | chr12:111885303 | G                        | GCGTGGGGAATA          | exonic   | p.L403Gfs*11          | A | 3.93  |
| 742 | JAK2 | PMF | U2AF1  | chr21:44514777  | T                        | G                     | exonic   | p.Q157P               | A | 31.56 |
| 747 | JAK2 | PMF | NFE2   | chr12:54686379  | GCCGCTCCAGCTC            | G                     | exonic   | p.E297_R300del        | B | 3.12  |
| 748 | JAK2 | PMF |        |                 |                          |                       |          | .                     |   |       |
| 749 | JAK2 | PMF | ATM    | chr11:108159742 | C                        | T                     | exonic   | p.S1383L              | C | 47.18 |
| 749 | JAK2 | PMF | TET2   | chr4:106158285  | C                        | CA                    | exonic   | p.T1063Nfs*4          | A | 17.84 |
| 749 | JAK2 | PMF | TET2   | chr4:106180835  | G                        | T                     | exonic   | p.G1288V              | A | 3.08  |
| 750 | JAK2 | PMF | ASXL1  | chr20:31022976  | GAT                      | G                     | exonic   | p.T822Ifs*9           | A | 11.04 |
| 750 | JAK2 | PMF | ATM    | chr11:108192052 | T                        | G                     | exonic   | p.C2159W              | C | 46.71 |
| 750 | JAK2 | PMF | GATA2  | chr3:128205017  | G                        | C                     | exonic   | p.P142A               | C | 46.64 |
| 750 | JAK2 | PMF | U2AF1  | chr21:44514777  | T                        | C                     | exonic   | p.Q157R               | A | 16.46 |
| 751 | JAK2 | PMF | GATA2  | chr3:128200137  | T                        | C                     | exonic   | p.K390E               | A | 44.47 |
| 751 | JAK2 | PMF | ATM    | chr11:108202273 | G                        | A                     | exonic   | p.V2540I              | C | 45.27 |
| 751 | JAK2 | PMF | SRSF2  | chr17:74732959  | G                        | T                     | exonic   | p.P95H                | A | 46.8  |
| 751 | JAK2 | PMF | ASXL1  | chr20:31022441  | A                        | AG                    | exonic   | p.G646Wfs*12          | A | 37.64 |
| 751 | JAK2 | PMF | RUNX1  | chr21:36206716  | G                        | A                     | exonic   | p.Q266X               | A | 50.17 |
| 752 | CALR | PMF | DNMT3A | chr2:25457242   | C                        | T                     | exonic   | p.R882H               | A | 44.47 |
| 752 | CALR | PMF | GATA2  | chr3:128202707  | C                        | CTTCGCTGGGCTTGATGAGGG | exonic   | p.R337_R338insTLIKPKR | B | 19.82 |

|     |      |     |        |                 |                 |                                       |          |              |   |       |
|-----|------|-----|--------|-----------------|-----------------|---------------------------------------|----------|--------------|---|-------|
| 752 | CALR | PMF | TET2   | chr4:106164085  | G               | A                                     | splicing | .            | C | 40.89 |
| 752 | CALR | PMF | TET2   | chr4:106197285  | T               | C                                     | exonic   | p.I1873T     | A | 40.73 |
| 753 | JAK2 | PMF | ASXL1  | chr20:31022441  | A               | AG                                    | exonic   | p.G646Wfs*12 | A | 40.12 |
| 753 | JAK2 | PMF | ETNK1  | chr12:22811995  | A               | G                                     | exonic   | p.N244S      | A | 41.79 |
| 753 | JAK2 | PMF | SRSF2  | chr17:74732959  | G               | T                                     | exonic   | p.P95H       | A | 48.99 |
| 753 | JAK2 | PMF | KMT2D  | chr12:49444220  | C               | T                                     | exonic   | p.V1051I     | C | 48.4  |
| 754 | JAK2 | PMF | ASXL1  | chr20:31022441  | A               | AG                                    | exonic   | p.G646Wfs*12 | A | 36.75 |
| 754 | JAK2 | PMF | ETV6   | chr12:12038961  | G               | A                                     | splicing | .            | C | 45.26 |
| 754 | JAK2 | PMF | EZH2   | chr7:148506408  | C               | G                                     | exonic   | p.A702P      | C | 47.1  |
| 754 | JAK2 | PMF | EZH2   | chr7:148515024  | TC              | T                                     | exonic   | p.G395Efs*28 | A | 45.68 |
| 754 | JAK2 | PMF | PTPN11 | chr12:112926851 | C               | T                                     | exonic   | p.P491S      | A | 39.16 |
| 754 | JAK2 | PMF | SETBP1 | chr18:42531913  | G               | A                                     | exonic   | p.G870S      | A | 5.22  |
| 755 | CALR | PMF | CHEK2  | chr22:29092969  | G               | A                                     | exonic   | p.H382Y      | B | 68.67 |
| 756 | CALR | PMF | ASXL1  | chr20:31022936  | TC              | T                                     | exonic   | p.P808Lfs*9  | A | 19.32 |
| 756 | CALR | PMF | ASXL1  | chr20:31022483  | T               | TGAGGGAGGTTGGCAGAGGCAGCA<br>GCAGCAGCA | exonic   | p.G666Sfs*11 | A | 8.1   |
| 756 | CALR | PMF | CUX1   | chr7:101844906  | G               | A                                     | exonic   | p.A788T      | C | 46.91 |
| 756 | CALR | PMF | DNMT3A | chr2:25463239   | A               | G                                     | exonic   | p.F752L      | A | 45.03 |
| 756 | CALR | PMF | EZH2   | chr7:148507447  | G               | C                                     | exonic   | p.S669R      | A | 9.08  |
| 756 | CALR | PMF | GNAS   | chr20:57429911  | C               | T                                     | exonic   | p.P531S      | C | 46.97 |
| 756 | CALR | PMF | JAK2   | chr9:5022085    | A               | C                                     | exonic   | p.K33T       | C | 52.17 |
| 756 | CALR | PMF | SUZ12  | chr17:30302702  | A               | G                                     | exonic   | p.M265V      | C | 51.42 |
| 757 | CALR | PMF | ASXL1  | chr20:31023223  | CGAATGATGAGGTAG | C                                     | exonic   | p.N904Efs*14 | A | 32.71 |
| 757 | CALR | PMF | ASXL1  | chr20:31023152  | T               | TA                                    | exonic   | p.T880Nfs*1  | A | 4.29  |
| 757 | CALR | PMF | BCOR   | chrX:39923606   | C               | A                                     | exonic   | p.R1162L     | C | 48.05 |
| 758 | JAK2 | PMF | ASXL1  | chr20:31022712  | C               | T                                     | exonic   | p.Q733X      | A | 36.68 |
| 758 | JAK2 | PMF | ETV6   | chr12:11992223  | C               | G                                     | exonic   | p.R105G      | A | 38.71 |
| 758 | JAK2 | PMF | TP53   | chr17:7578464   | G               | A                                     | exonic   | p.R156C      | A | 52.64 |
| 759 | JAK2 | PMF | IDH2   | chr15:90631934  | C               | T                                     | exonic   | p.R140Q      | A | 25.48 |
| 759 | JAK2 | PMF | KMT2D  | chr12:49443761  | T               | C                                     | exonic   | p.I1204V     | C | 50.23 |
| 759 | JAK2 | PMF | TET2   | chr4:106190767  | A               | T                                     | exonic   | p.I1349F     | B | 6.26  |
| 760 | JAK2 | SMF | SETBP1 | chr18:42530872  | C               | T                                     | exonic   | p.H523Y      | C | 48.81 |
| 760 | JAK2 | SMF | TET2   | chr4:106190776  | G               | T                                     | exonic   | p.E1352X     | A | 46.47 |
| 761 | JAK2 | SMF | KRAS   | chr12:25398255  | G               | T                                     | exonic   | p.Q22K       | A | 6.31  |
| 761 | JAK2 | SMF | NFE2   | chr12:54686494  | GCTCT           | G                                     | exonic   | p.E261Afs*2  | A | 5.76  |
| 761 | JAK2 | SMF | SH2B3  | chr12:111884836 | G               | GTA                                   | exonic   | p.G309Vfs*15 | A | 4.52  |

|     |      |     |        |                 |                           |    |        |               |   |       |
|-----|------|-----|--------|-----------------|---------------------------|----|--------|---------------|---|-------|
| 761 | JAK2 | SMF | SUZ12  | chr17:30320348  | A                         | G  | exonic | p.Y430C       | B | 35.95 |
| 761 | JAK2 | SMF | TET2   | chr4:106196819  | G                         | T  | exonic | p.V1718L      | A | 49.17 |
| 762 | JAK2 | PMF | ASXL1  | chr20:31022853  | C                         | T  | exonic | p.Q780X       | A | 28.56 |
| 763 | JAK2 | PMF |        |                 |                           |    |        | .             |   |       |
| 764 | JAK2 | PMF | ASXL1  | chr20:31021535  | C                         | T  | exonic | p.Q512X       | A | 42.82 |
| 764 | JAK2 | PMF | EZH2   | chr7:148515005  | CTTCT                     | C  | exonic | p.E401Kfs*21  | A | 98.05 |
| 764 | JAK2 | PMF | NF1    | chr17:29552206  | C                         | T  | exonic | p.H647Y       | C | 48.74 |
| 764 | JAK2 | PMF | SETBP1 | chr18:42531913  | G                         | A  | exonic | p.G870S       | A | 2.67  |
| 764 | JAK2 | PMF | TET2   | chr4:106193801  | C                         | G  | exonic | p.Y1421X      | A | 84.74 |
| 765 | JAK2 | SMF | ASXL1  | chr20:31022385  | G                         | GT | exonic | p.R625Pfs*9   | A | 47.84 |
| 765 | JAK2 | SMF | CHEK2  | chr22:29115387  | C                         | T  | exonic | p.G270R       | B | 31.31 |
| 765 | JAK2 | SMF | ZBTB33 | chrX:119389063  | C                         | CA | exonic | p.Y599Ifs*4   | A | 8.73  |
| 766 | TN   | PMF | ASXL1  | chr20:31022288  | C                         | G  | exonic | p.Y591X       | A | 43.69 |
| 766 | TN   | PMF | DOT1L  | chr19:2191113   | G                         | A  | exonic | p.E123K       | B | 38.71 |
| 766 | TN   | PMF | NRAS   | chr1:115258744  | C                         | A  | exonic | p.G13V        | A | 20.21 |
| 766 | TN   | PMF | PDS5B  | chr13:33306277  | A                         | AC | exonic | p.R724Pfs*15  | A | 10.27 |
| 766 | TN   | PMF | PHF6   | chrX:133551305  | T                         | C  | exonic | p.I314T       | A | 89.31 |
| 766 | TN   | PMF | RUNX1  | chr21:36171607  | G                         | A  | exonic | p.R320X       | A | 43.3  |
| 766 | TN   | PMF | SRSF2  | chr17:74732959  | G                         | A  | exonic | p.P95L        | A | 37.59 |
| 766 | TN   | PMF | TET2   | chr4:106182999  | TA                        | T  | exonic | p.N1347Ifs*15 | A | 47.02 |
| 766 | TN   | PMF | TET2   | chr4:106157057  | TC                        | T  | exonic | p.Q654Kfs*45  | A | 41.7  |
| 767 | JAK2 | PMF | ASXL1  | chr20:31024026  | AG                        | A  | exonic | p.A1172Lfs*1  | A | 13.67 |
| 767 | JAK2 | PMF | BCOR   | chrX:39932218   | C                         | G  | exonic | p.G794A       | C | 50.87 |
| 767 | JAK2 | PMF | U2AF1  | chr21:44524456  | G                         | A  | exonic | p.S34F        | A | 6.74  |
| 768 | JAK2 | PMF | KMT2A  | chr11:118373998 | A                         | G  | exonic | p.K2464R      | C | 49.6  |
| 769 | JAK2 | PMF | ASXL1  | chr20:31022402  | TCACCACTGCCATAGAGAGGCCGGC | T  | exonic | p.E635Rfs*15  | A | 19.0  |
| 772 | JAK2 | PMF | IDH1   | chr2:209113112  | C                         | T  | exonic | p.R132H       | A | 3.42  |
| 772 | JAK2 | PMF | RUNX1  | chr21:36164601  | G                         | A  | exonic | p.P425L       | A | 66.72 |
| 772 | JAK2 | PMF | SRSF2  | chr17:74732959  | G                         | C  | exonic | p.P95R        | A | 41.6  |
| 772 | JAK2 | PMF | GNAS   | chr20:57429623  | C                         | T  | exonic | p.P435S       | C | 50.61 |
| 773 | CALR | PMF |        |                 |                           |    |        | .             |   |       |
| 774 | JAK2 | PMF | SF3B1  | chr2:198267359  | C                         | A  | exonic | p.K666N       | A | 21.53 |
| 780 | JAK2 | PMF | ASXL1  | chr20:31022441  | AGGGGG                    | A  | exonic | p.G644Wfs*10  | A | 47.67 |
| 780 | JAK2 | PMF | SETBP1 | chr18:42531907  | G                         | A  | exonic | p.D868N       | A | 20.63 |
| 780 | JAK2 | PMF | SRSF2  | chr17:74732959  | G                         | T  | exonic | p.P95H        | A | 48.25 |
| 781 | JAK2 | PMF | ASXL1  | chr20:31023717  | C                         | T  | exonic | p.R1068X      | A | 14.18 |

|     |      |     |        |                 |       |     |          |               |   |       |
|-----|------|-----|--------|-----------------|-------|-----|----------|---------------|---|-------|
| 781 | JAK2 | PMF | PPM1D  | chr17:58740816  | ACT   | A   | exonic   | p.S575fs*     | A | 8.9   |
| 781 | JAK2 | PMF | U2AF1  | chr21:44524456  | G     | A   | exonic   | p.S34F        | A | 8.67  |
| 781 | JAK2 | PMF | ZBTB33 | chrX:119387692  | A     | AT  | exonic   | p.S142Ffs*2   | A | 10.02 |
| 782 | MPL  | SMF | BCL11A | chr2:60773426   | A     | G   | exonic   | p.L22P        | C | 48.68 |
| 782 | MPL  | SMF | KMT2D  | chr12:49427308  | C     | T   | exonic   | p.R3727H      | C | 52.77 |
| 784 | CALR | SMF | KMT2B  | chr19:36209056  | G     | C   | exonic   | p.A46P        | C | 41.41 |
| 785 | JAK2 | PMF | ASXL1  | chr20:31022441  | A     | AG  | exonic   | p.G646Wfs*12  | A | 35.98 |
| 785 | JAK2 | PMF | CBL    | chr11:119155977 | C     | G   | exonic   | p.P548A       | C | 49.07 |
| 785 | JAK2 | PMF | NRAS   | chr1:115256532  | C     | A   | exonic   | p.G60V        | A | 2.84  |
| 785 | JAK2 | PMF | SRSF2  | chr17:74732959  | G     | T   | exonic   | p.P95H        | A | 44.76 |
| 786 | CALR | SMF | ATM    | chr11:108143471 | C     | T   | exonic   | p.A1059V      | C | 41.73 |
| 786 | CALR | SMF | KMT2B  | chr19:36223528  | G     | C   | exonic   | p.E2026D      | C | 50.1  |
| 786 | CALR | SMF | NFE2   | chr12:54686494  | GCTCT | G   | exonic   | p.E261Afs*2   | A | 16.25 |
| 788 | JAK2 | SMF |        |                 |       |     |          | .             |   |       |
| 789 | TN   | PMF | CBL    | chr11:119149239 | G     | C   | exonic   | p.C416S       | A | 3.27  |
| 789 | TN   | PMF | KIT    | chr4:55599321   | A     | T   | exonic   | p.D816V       | A | 6.84  |
| 789 | TN   | PMF | KMT2A  | chr11:118360923 | A     | G   | exonic   | p.D1552G      | C | 51.29 |
| 789 | TN   | PMF | KMT2A  | chr11:118372555 | G     | A   | exonic   | p.R2163Q      | C | 53.62 |
| 789 | TN   | PMF | NF1    | chr17:29664476  | CT    | C   | exonic   | p.A2174Lfs*25 | A | 9.66  |
| 789 | TN   | PMF | SRSF2  | chr17:74732959  | G     | C   | exonic   | p.P95R        | A | 44.04 |
| 789 | TN   | PMF | TET2   | chr4:106157023  | C     | T   | exonic   | p.Q642X       | A | 67.54 |
| 793 | CALR | PMF | IDH1   | chr2:209113112  | C     | T   | exonic   | p.R132H       | A | 4.57  |
| 794 | JAK2 | PMF | ASXL2  | chr2:25973185   | C     | CAG | exonic   | p.V414Lfs*9   | A | 35.83 |
| 794 | JAK2 | PMF | IDH2   | chr15:90631934  | C     | T   | exonic   | p.R140Q       | A | 35.31 |
| 794 | JAK2 | PMF | KRAS   | chr12:25380285  | G     | A   | exonic   | p.T58I        | A | 2.42  |
| 794 | JAK2 | PMF | SRSF2  | chr17:74732959  | G     | A   | exonic   | p.P95L        | A | 41.57 |
| 795 | CALR | SMF | ASXL1  | chr20:31022592  | C     | T   | exonic   | p.R693X       | A | 40.81 |
| 796 | JAK2 | SMF | DOT1L  | chr19:2210451   | C     | T   | exonic   | p.A353V       | C | 47.14 |
| 796 | JAK2 | SMF | IDH2   | chr15:90633791  | A     | C   | exonic   | p.I98S        | C | 52.57 |
| 796 | JAK2 | SMF | MPL    | chr1:43818306   | T     | G   | exonic   | p.Y591D       | A | 3.25  |
| 796 | JAK2 | SMF | PHF6   | chrX:133527529  | A     | G   | splicing | .             | B | 4.52  |
| 796 | JAK2 | SMF | TET2   | chr4:106190843  | G     | T   | exonic   | p.C1374F      | C | 50.12 |
| 797 | CALR | PMF | EZH2   | chr7:148511073  | C     | T   | exonic   | p.S610N       | C | 48.78 |
| 797 | CALR | PMF | KRAS   | chr12:25380268  | A     | T   | exonic   | p.Y64N        | B | 39.69 |
| 797 | CALR | PMF | RUNX1  | chr21:36164907  | G     | C   | exonic   | p.T323R       | C | 53.69 |
| 799 | TN   | PMF | ACD    | chr16:67694138  | C     | T   | exonic   | p.G82S        | C | 45.87 |

|     |      |     |             |                 |                          |    |        |               |   |       |
|-----|------|-----|-------------|-----------------|--------------------------|----|--------|---------------|---|-------|
| 799 | TN   | PMF | ASXL1       | chr20:31022441  | A                        | AG | exonic | p.G646Wfs*12  | A | 41.79 |
| 799 | TN   | PMF | CUX1        | chr7:101882712  | GAA                      | G  | exonic | p.K1257Tfs*59 | A | 15.36 |
| 799 | TN   | PMF | DOT1L       | chr19:2226731   | C                        | A  | exonic | p.P1404Q      | C | 57.26 |
| 799 | TN   | PMF | NF1         | chr17:29562747  | G                        | A  | exonic | p.R1276Q      | A | 46.4  |
| 799 | TN   | PMF | NF1         | chr17:29550541  | C                        | T  | exonic | p.R601W       | B | 4.29  |
| 802 | JAK2 | SMF | ASXL1       | chr20:31022288  | C                        | A  | exonic | p.Y591X       | A | 6.68  |
| 802 | JAK2 | SMF | CHEK2       | chr22:29107938  | T                        | A  | exonic | p.I294F       | C | 48.39 |
| 802 | JAK2 | SMF | NF1         | chr17:29657356  | T                        | G  | exonic | p.F1884L      | B | 7.25  |
| 802 | JAK2 | SMF | PHF6        | chrX:133511726  | G                        | GA | exonic | p.C28Mfs*7    | A | 6.08  |
| 802 | JAK2 | SMF | TET2        | chr4:106193892  | C                        | T  | exonic | p.R1452X      | A | 46.29 |
| 806 | JAK2 | PMF | ASXL1       | chr20:31022402  | TCACCACTGCCATAGAGAGGCGGC | T  | exonic | p.E635Rfs*15  | A | 24.11 |
| 806 | JAK2 | PMF | CTCF        | chr16:67654646  | C                        | A  | exonic | p.P378Q       | C | 45.45 |
| 806 | JAK2 | PMF | EZH2        | chr7:148506477  | C                        | T  | exonic | p.V679M       | A | 15.83 |
| 806 | JAK2 | PMF | MAD1L1      | chr7:2255629    | A                        | G  | exonic | p.M272T       | C | 49.65 |
| 806 | JAK2 | PMF | NF1         | chr17:29687709  | C                        | A  | exonic | p.Q2789K      | C | 47.79 |
| 806 | JAK2 | PMF | PDS5B       | chr13:33349159  | G                        | A  | exonic | p.R1438Q      | C | 49.65 |
| 807 | CALR | PMF |             |                 |                          |    |        | .             |   |       |
| 808 | JAK2 | PMF | ASXL1       | chr20:31022402  | TCACCACTGCCATAGAGAGGCGGC | T  | exonic | p.E635Rfs*15  | A | 27.14 |
| 808 | JAK2 | PMF | EZH2        | chr7:148506415  | GT                       | G  | exonic | p.N699Tfs*6   | A | 46.24 |
| 808 | JAK2 | PMF | EZH2        | chr7:148507433  | A                        | T  | exonic | p.L674X       | A | 45.27 |
| 808 | JAK2 | PMF | NPM1        | chr5:170819962  | TGAA                     | T  | exonic | p.E170del     | C | 47.5  |
| 809 | CALR | PMF |             |                 |                          |    |        | .             |   |       |
| 813 | TN   | PMF | CUX1        | chr7:101892123  | C                        | T  | exonic | p.P1451L      | C | 44.95 |
| 813 | TN   | PMF | MPL         | chr1:43804375   | CT                       | C  | exonic | p.F126Lfs*4   | A | 51.41 |
| 814 | JAK2 | SMF | ASXL1       | chr20:31023105  | GA                       | G  | exonic | p.D864Afs*2   | A | 33.38 |
| 814 | JAK2 | SMF | SRSF2       | chr17:74732959  | G                        | T  | exonic | p.P95H        | A | 34.66 |
| 814 | JAK2 | SMF | TET2        | chr4:106197300  | G                        | A  | exonic | p.R1878H      | B | 36.56 |
| 814 | JAK2 | SMF | TP53        | chr17:7578406   | C                        | T  | exonic | p.R175H       | A | 49.28 |
| 815 | CALR | PMF | CBL         | chr11:119148880 | A                        | G  | exonic | p.Q367R       | A | 2.48  |
| 815 | CALR | PMF | DNMT3A      | chr2:25463265   | G                        | A  | exonic | p.P743L       | C | 45.56 |
| 815 | CALR | PMF | MPL         | chr1:43805230   | CA                       | AG | exonic | p.P227Q       | C | 51.7  |
| 815 | CALR | PMF | TET2        | chr4:106197373  | C                        | A  | exonic | p.Y1902X      | A | 2.46  |
| 816 | CALR | PMF |             |                 |                          |    |        | .             |   |       |
| 817 | JAK2 | PMF | ANKRD2<br>6 | chr10:27366308  | T                        | TA | exonic | p.K346fs*     | A | 53.36 |
| 817 | JAK2 | PMF | ASXL2       | chr2:25973214   | GT                       | G  | exonic | p.T404Pfs*18  | A | 43.98 |

|     |      |     |             |                 |    |    |          |               |   |       |
|-----|------|-----|-------------|-----------------|----|----|----------|---------------|---|-------|
| 817 | JAK2 | PMF | CBL         | chr11:119156010 | C  | T  | exonic   | p.R559X       | A | 47.12 |
| 817 | JAK2 | PMF | CHEK2       | chr22:29091856  | AG | A  | exonic   | p.T410Mfs*14  | A | 44.88 |
| 817 | JAK2 | PMF | IDH2        | chr15:90631934  | C  | T  | exonic   | p.R140Q       | A | 43.7  |
| 817 | JAK2 | PMF | SRSF2       | chr17:74732959  | G  | C  | exonic   | p.P95R        | A | 44.86 |
| 820 | CALR | PMF | ASXL1       | chr20:31022502  | A  | AG | exonic   | p.S663Rfs*4   | A | 42.28 |
| 820 | CALR | PMF | IDH2        | chr15:90631934  | C  | T  | exonic   | p.R140Q       | A | 40.16 |
| 825 | CALR | PMF | DNMT3A      | chr2:25470028   | C  | G  | splicing | .             | C | 45.22 |
| 825 | CALR | PMF | GNAS        | chr20:57484420  | C  | T  | exonic   | p.R844C       | B | 50.64 |
| 827 | JAK2 | SMF | NFE2        | chr12:54686465  | C  | T  | exonic   | p.R272Q       | B | 51.16 |
| 829 | JAK2 | SMF | GNAS        | chr20:57429850  | C  | T  | exonic   | p.S448F       | C | 54.75 |
| 829 | JAK2 | SMF | SF3B1       | chr2:198267359  | C  | G  | exonic   | p.K666N       | A | 4.37  |
| 829 | JAK2 | SMF | TET2        | chr4:106156465  | G  | T  | exonic   | p.E456X       | A | 51.58 |
| 830 | JAK2 | PMF | ASXL1       | chr20:31022441  | A  | AG | exonic   | p.G646Wfs*12  | A | 36.07 |
| 830 | JAK2 | PMF | EZH2        | chr7:148506172  | A  | G  | exonic   | p.F729S       | C | 48.92 |
| 830 | JAK2 | PMF | EZH2        | chr7:148513775  | C  | T  | splicing | .             | C | 48.18 |
| 830 | JAK2 | PMF | GNAS        | chr20:57484421  | G  | A  | exonic   | p.R844H       | A | 51.28 |
| 834 | JAK2 | SMF | ANKRD2<br>6 | chr10:27317843  | T  | A  | exonic   | p.T1304S      | B | 29.54 |
| 834 | JAK2 | SMF | NFE2        | chr12:54686466  | G  | A  | exonic   | p.R272X       | A | 23.3  |
| 836 | JAK2 | SMF | RUNX1       | chr21:36164647  | A  | C  | exonic   | p.S410A       | C | 50.46 |
| 836 | JAK2 | SMF | U2AF1       | chr21:44524456  | G  | A  | exonic   | p.S34F        | A | 24.88 |
| 837 | CALR | PMF |             |                 |    |    |          | .             |   |       |
| 849 | CALR | PMF | CBL         | chr11:119148991 | G  | A  | exonic   | p.C404Y       | A | 20.75 |
| 850 | JAK2 | SMF | NFE2        | chr12:54686465  | C  | T  | exonic   | p.R272Q       | B | 19.49 |
| 850 | JAK2 | SMF | SH2B3       | chr12:111856357 | G  | C  | exonic   | p.Q136H       | C | 50.19 |
| 851 | CALR | SMF | KMT2C       | chr7:151878244  | G  | A  | exonic   | p.T2234I      | C | 48.28 |
| 851 | CALR | SMF | TET2        | chr4:106196819  | G  | T  | exonic   | p.V1718L      | A | 50.35 |
| 863 | JAK2 | PMF | IDH2        | chr15:90631934  | C  | T  | exonic   | p.R140Q       | A | 2.05  |
| 863 | JAK2 | PMF | SRSF2       | chr17:74732959  | G  | A  | exonic   | p.P95L        | A | 32.68 |
| 863 | JAK2 | PMF | TET2        | chr4:106196234  | C  | T  | exonic   | p.Q1523X      | A | 2.02  |
| 863 | JAK2 | PMF | NOTCH1      | chr9:139410088  | C  | T  | exonic   | p.V584I       | C | 50.24 |
| 868 | JAK2 | PMF | KRAS        | chr12:25380276  | T  | C  | exonic   | p.Q61R        | A | 2.44  |
| 868 | JAK2 | PMF | RUNX1       | chr21:36231783  | G  | C  | exonic   | p.R201G       | A | 51.82 |
| 868 | JAK2 | PMF | SH2B3       | chr12:111885593 | G  | A  | exonic   | p.R457Q       | C | 48.43 |
| 868 | JAK2 | PMF | SRSF2       | chr17:74732959  | G  | A  | exonic   | p.P95L        | A | 46.03 |
| 868 | JAK2 | PMF | TET2        | chr4:106193781  | CT | C  | exonic   | p.H1416Tfs*31 | A | 47.11 |



|     |      |     |        |                 |            |          |          |                    |   |       |
|-----|------|-----|--------|-----------------|------------|----------|----------|--------------------|---|-------|
| 868 | JAK2 | PMF | TET2   | chr4:106193786  | C          | A        | exonic   | p.H1416Q           | C | 43.78 |
| 877 | TN   | SMF | ACD    | chr16:67692676  | G          | T        | exonic   | p.S316Y            | C | 51.06 |
| 877 | TN   | SMF | GNAS   | chr20:57429720  | C          | A        | exonic   | p.A467D            | C | 48.05 |
| 877 | TN   | SMF | MPL    | chr1:43818304   | ACTACCGAAG | A        | exonic   | p.D590_R593delinsE | A | 37.93 |
| 878 | CALR | PMF |        |                 |            |          |          | .                  |   |       |
| 879 | JAK2 | PMF | JAK2   | chr9:5055751    | G          | A        | exonic   | p.R340Q            | C | 53.05 |
| 879 | JAK2 | PMF | TET2   | chr4:106196726  | C          | T        | exonic   | p.Q1687X           | A | 2.62  |
| 880 | CALR | SMF | MPL    | chr1:43814664   | A          | G        | exonic   | p.T487A            | B | 3.31  |
| 880 | CALR | SMF | TP53   | chr17:7578470   | C          | T        | exonic   | p.G154S            | A | 48.6  |
| 880 | CALR | SMF | ZRSR2  | chrX:15836766   | G          | A        | splicing | .                  | B | 2.94  |
| 881 | JAK2 | SMF | ASXL1  | chr20:31022423  | G          | GGCCA    | exonic   | p.T638Sfs*19       | A | 45.87 |
| 881 | JAK2 | SMF | CSF3R  | chr1:36937925   | G          | T        | exonic   | p.T304N            | C | 52.82 |
| 881 | JAK2 | SMF | EZH2   | chr7:148512610  | G          | C        | exonic   | p.Q512E            | B | 39.44 |
| 881 | JAK2 | SMF | ZRSR2  | chrX:15822239   | G          | GT       | exonic   | p.L107Ffs*37       | A | 14.9  |
| 881 | JAK2 | SMF | ZRSR2  | chrX:15822245   | G          | GA       | exonic   | p.E109Rfs*35       | A | 16.29 |
| 882 | CALR | PMF |        |                 |            |          |          | .                  |   |       |
| 883 | JAK2 | PMF | ASXL1  | chr20:31023597  | TC         | T        | exonic   | p.S1028Wfs*17      | A | 42.6  |
| 883 | JAK2 | PMF | ATM    | chr11:108122604 | A          | G        | exonic   | p.I550V            | C | 43.42 |
| 883 | JAK2 | PMF | ETV6   | chr12:12022430  | T          | TG       | exonic   | p.H180Afs*15       | A | 12.13 |
| 884 | JAK2 | PMF | U2AF1  | chr21:44514777  | T          | C        | exonic   | p.Q157R            | A | 37.58 |
| 885 | JAK2 | PMF | CSF3R  | chr1:36937992   | C          | T        | exonic   | p.V282M            | C | 47.92 |
| 885 | JAK2 | PMF | SF3B1  | chr2:198267359  | C          | G        | exonic   | p.K666N            | A | 44.41 |
| 886 | JAK2 | PMF | CUX1   | chr7:101892266  | A          | T        | exonic   | p.I1499F           | B | 18.81 |
| 886 | JAK2 | PMF | PTPN11 | chr12:112891012 | C          | T        | exonic   | p.H116Y            | C | 49.35 |
| 886 | JAK2 | PMF | U2AF1  | chr21:44514777  | T          | G        | exonic   | p.Q157P            | A | 20.81 |
| 887 | CALR | SMF | HMGA2  | chr12:66219073  | C          | T        | exonic   | p.A8V              | C | 2.37  |
| 887 | CALR | SMF | KMT2C  | chr7:151878907  | C          | T        | exonic   | p.R2013K           | C | 52.25 |
| 888 | JAK2 | SMF |        |                 |            |          |          | .                  |   |       |
| 889 | JAK2 | SMF | DNMT3A | chr2:25463287   | G          | A        | exonic   | p.R736C            | A | 5.06  |
| 889 | JAK2 | SMF | EZH2   | chr7:148514434  | T          | TTC      | exonic   | p.P431Nfs*32       | A | 15.3  |
| 889 | JAK2 | SMF | MPL    | chr1:43805067   | C          | G        | exonic   | p.P173A            | C | 50.55 |
| 889 | JAK2 | SMF | NOTCH1 | chr9:139391320  | C          | T        | exonic   | p.G2291R           | C | 50.84 |
| 890 | JAK2 | SMF | SMC3   | chr10:112361545 | T          | C        | exonic   | p.L932P            | A | 18.57 |
| 891 | JAK2 | SMF | ASXL1  | chr20:31022403  | C          | CACCACTG | exonic   | p.C632fs*          | A | 2.47  |
| 891 | JAK2 | SMF | PPM1D  | chr17:58740634  | G          | C        | exonic   | p.L513F            | C | 49.08 |
| 891 | JAK2 | SMF | U2AF1  | chr21:44524456  | G          | T        | exonic   | p.S34Y             | A | 7.47  |

|     |      |     |        |                 |                         |    |          |                      |   |       |
|-----|------|-----|--------|-----------------|-------------------------|----|----------|----------------------|---|-------|
| 892 | JAK2 | SMF |        |                 |                         |    |          |                      |   |       |
| 893 | TN   | PMF | ASXL2  | chr2:25966512   | C                       | G  | exonic   | p.K898N              | C | 49.98 |
| 893 | TN   | PMF | PTEN   | chr10:89624062  | C                       | G  | exonic   | p.R119G <sup>‡</sup> | C | 56.77 |
| 894 | JAK2 | PMF | ATM    | chr11:108121562 | G                       | A  | exonic   | p.R457Q              | C | 50.18 |
| 894 | JAK2 | PMF | NFE2   | chr12:54687121  | TG                      | T  | exonic   | p.P53Qfs*57          | A | 8.23  |
| 894 | JAK2 | PMF | TET2   | chr4:106164937  | T                       | G  | splicing | .                    | B | 2.17  |
| 895 | MPL  | PMF | CALR   | chr19:13054699  | T                       | G  | exonic   | p.V409G              | C | 51.64 |
| 895 | MPL  | PMF | MPL    | chr1:43818306   | T                       | G  | exonic   | p.Y591D              | A | 46.24 |
| 895 | MPL  | PMF | MPL    | chr1:43818330   | C                       | A  | exonic   | p.L599M              | C | 45.26 |
| 895 | MPL  | PMF | TET2   | chr4:106156687  | C                       | T  | exonic   | p.Q530X              | A | 36.46 |
| 899 | CALR | PMF | ASXL1  | chr20:31022441  | A                       | AG | exonic   | p.G646Wfs*12         | A | 4.46  |
| 899 | CALR | PMF | NOTCH1 | chr9:139399321  | G                       | A  | exonic   | p.R1608C             | C | 51.72 |
| 901 | JAK2 | SMF | CHEK2  | chr22:29120989  | C                       | T  | exonic   | p.A233T              | B | 23.15 |
| 901 | JAK2 | SMF | DNMT3A | chr2:25457243   | G                       | A  | exonic   | p.R882C              | A | 20.43 |
| 903 | MPL  | PMF | ASXL1  | chr20:31022628  | G                       | T  | exonic   | p.E705X              | A | 2.23  |
| 904 | JAK2 | SMF | BCORL1 | chrX:129148271  | TG                      | T  | exonic   | p.A509Pfs*3          | A | 89.74 |
| 904 | JAK2 | SMF | EED    | chr11:85988145  | T                       | A  | exonic   | p.W364R              | C | 45.64 |
| 904 | JAK2 | SMF | KMT2D  | chr12:49427419  | C                       | T  | exonic   | p.G3690E             | C | 47.87 |
| 904 | JAK2 | SMF | TET2   | chr4:106157911  | AC                      | A  | exonic   | p.T938lfs*14         | A | 46.02 |
| 904 | JAK2 | SMF | TP53   | chr17:7577070   | G                       | A  | exonic   | p.R290C              | C | 46.87 |
| 905 | JAK2 | PMF | BCORL1 | chrX:129148989  | GCAGGAGCCCAT            | G  | exonic   | p.Q748Lfs*3          | A | 2.19  |
| 905 | JAK2 | PMF | CBL    | chr11:119148919 | T                       | C  | exonic   | p.L380P              | A | 4.04  |
| 905 | JAK2 | PMF | CBL    | chr11:119149372 | TG                      | T  | exonic   | p.E461Nfs*8          | A | 3.53  |
| 922 | JAK2 | PMF | ACD    | chr16:67691689  | A                       | C  | exonic   | p.L511R              | C | 46.87 |
| 950 | CALR | PMF | SH2B3  | chr12:111885299 | C                       | T  | exonic   | p.T396M              | C | 46.78 |
| 950 | CALR | PMF | TET2   | chr4:106157112  | TCATGTGCAGTCACTGTG      | T  | exonic   | p.H672Wfs*2          | A | 28.59 |
| 950 | CALR | PMF | WT1    | chr11:32450067  | G                       | A  | exonic   | p.P249S              | A | 51.32 |
| 951 | JAK2 | SMF | NFE2   | chr12:54686923  | CGGCTCACTGAGCAGGCCTGAGA | C  | exonic   | p.L112Rfs*5          | A | 2.98  |
| 951 | JAK2 | SMF | RUNX1  | chr21:36206725  | G                       | A  | exonic   | p.P263S              | C | 47.39 |
| 952 | CALR | SMF | FBXW7  | chr4:153271203  | T                       | G  | exonic   | p.E192A              | A | 40.26 |
| 952 | CALR | SMF | NOTCH1 | chr9:139405630  | GAGA                    | G  | exonic   | p.F853del            | C | 46.41 |
| 952 | CALR | SMF | PAX5   | chr9:36846850   | C                       | T  | exonic   | p.R286Q <sup>‡</sup> | C | 48.08 |
| 954 | CALR | PMF | CUX1   | chr7:101870884  | CC                      | GT | exonic   | p.S1134C             | C | 49.34 |
| 955 | JAK2 | SMF | CTCF   | chr16:67654637  | G                       | A  | exonic   | p.G375E              | B | 37.52 |
| 955 | JAK2 | SMF | KMT2D  | chr12:49435227  | T                       | C  | exonic   | p.Q2109R             | C | 53.77 |

|     |      |     |        |                 |                          |    |        |               |   |       |
|-----|------|-----|--------|-----------------|--------------------------|----|--------|---------------|---|-------|
| 960 | MPL  | SMF | ASXL1  | chr20:31022402  | TCACCACTGCCATAGAGAGGCGGC | T  | exonic | p.E635Rfs*15  | A | 11.87 |
| 960 | MPL  | SMF | NF1    | chr17:29562744  | T                        | TC | exonic | p.R1276Pfs*7  | A | 2.54  |
| 962 | CALR | SMF |        |                 |                          |    |        | .             |   |       |
| 966 | JAK2 | SMF | ASXL1  | chr20:31023186  | G                        | GT | exonic | p.S892Ffs*1   | A | 3.16  |
| 966 | JAK2 | SMF | BCOR   | chrX:39923788   | AG                       | A  | exonic | p.P1101Lfs*11 | A | 24.43 |
| 966 | JAK2 | SMF | CTCF   | chr16:67654709  | G                        | A  | exonic | p.R399K       | B | 22.55 |
| 966 | JAK2 | SMF | EED    | chr11:85979559  | T                        | C  | exonic | p.Y308H       | B | 4.23  |
| 966 | JAK2 | SMF | EZH2   | chr7:148523665  | T                        | A  | exonic | p.N263I       | B | 4.43  |
| 966 | JAK2 | SMF | IDH1   | chr2:209108170  | A                        | C  | exonic | p.F227V       | C | 43.93 |
| 966 | JAK2 | SMF | NOTCH1 | chr9:139399225  | C                        | T  | exonic | p.A1640T      | C | 49.29 |
| 966 | JAK2 | SMF | PPM1D  | chr17:58740642  | C                        | G  | exonic | p.S516X       | A | 2.79  |
| 966 | JAK2 | SMF | PTPN11 | chr12:112891014 | T                        | A  | exonic | p.H116Q       | B | 7.94  |
| 966 | JAK2 | SMF | TET2   | chr4:106158100  | A                        | T  | exonic | p.K1001X      | A | 27.46 |
| 966 | JAK2 | SMF | TET2   | chr4:106190779  | C                        | T  | exonic | p.H1353Y      | C | 44.07 |

# Checklist for REporting of tumor MARKer Studies (REMARK) guidelines

|                                                                                                                                                                                                                                                                                                                                                                                                                                                                                                                                                                                                                                                                                                                                                                                                                                                                                                                                                                                                                                                                                                                                                                                                                                                                                                                                                                                                                                                                                                                                                                                                                                                                                                                                                                                                                                                                 |                                                                                                                                                                                                                                                                                                                                                                                                                                                                                                                                                                                                                           |
|-----------------------------------------------------------------------------------------------------------------------------------------------------------------------------------------------------------------------------------------------------------------------------------------------------------------------------------------------------------------------------------------------------------------------------------------------------------------------------------------------------------------------------------------------------------------------------------------------------------------------------------------------------------------------------------------------------------------------------------------------------------------------------------------------------------------------------------------------------------------------------------------------------------------------------------------------------------------------------------------------------------------------------------------------------------------------------------------------------------------------------------------------------------------------------------------------------------------------------------------------------------------------------------------------------------------------------------------------------------------------------------------------------------------------------------------------------------------------------------------------------------------------------------------------------------------------------------------------------------------------------------------------------------------------------------------------------------------------------------------------------------------------------------------------------------------------------------------------------------------|---------------------------------------------------------------------------------------------------------------------------------------------------------------------------------------------------------------------------------------------------------------------------------------------------------------------------------------------------------------------------------------------------------------------------------------------------------------------------------------------------------------------------------------------------------------------------------------------------------------------------|
| <p><b>Introduction</b><br/>1. State the marker examined, the study objectives, and any prespecified hypotheses.</p>                                                                                                                                                                                                                                                                                                                                                                                                                                                                                                                                                                                                                                                                                                                                                                                                                                                                                                                                                                                                                                                                                                                                                                                                                                                                                                                                                                                                                                                                                                                                                                                                                                                                                                                                             | <p><a href="#">Introduction section (page 1 lines 29-32)</a></p>                                                                                                                                                                                                                                                                                                                                                                                                                                                                                                                                                          |
| <p><b>Materials and Methods</b><br/><b>Patients</b><br/>2. Describe the characteristics (eg, disease stage or comorbidities) of the study patients, including their source and inclusion and exclusion criteria.<br/>3. Describe treatments received and how chosen (eg, randomized or rule-based). Specimen characteristics<br/>4. Describe the type of biological material used (including control samples) and methods of preservation and storage.<br/><b>Assay methods</b><br/>5. Specify the assay method used and provide (or reference) a detailed protocol, including specific reagents or kits used, quality control procedures, reproducibility assessments, quantitation methods, and scoring and reporting protocols. Specify whether and how assays were performed blinded to the study end point.<br/><b>Study design</b><br/>6. State the method of case selection, including whether the study design was prospective or retrospective and whether stratification or matching (eg, by stage of disease or age) was used. Specify the time period from which cases were taken, the end of the follow-up period, and the median follow-up time.<br/><br/>7. Precisely define all clinical end points examined.<br/><br/>8. List all candidate variables initially examined or considered for inclusion in models.<br/>9. Give rationale for sample size; if the study was designed to detect a specified effect size, give the target power and effect size.<br/><b>Statistical analysis methods</b><br/>10. Specify all statistical methods, including details of any variable selection procedures and other model-building issues, how model assumptions were verified, and how missing data were handled.<br/>11. Clarify how marker values were handled in the analyses; if relevant, describe methods used for cutpoint determination.</p> | <p><a href="#">Supplemental Table S1</a></p> <p><a href="#">Not applicable</a><br/><a href="#">Supplemental section p2</a></p> <p><a href="#">Supplemental section p4-8</a></p> <p><a href="#">Patients and samples section in Material and methods (page 2 lines 37-52), Supplemental section p2 and Supplemental Table 1 for median follow-up</a><br/><a href="#">Supplemental section p11 : death and leukemic transformation</a><br/><a href="#">Supplemental section p10</a><br/><a href="#">Supplemental section p8</a></p> <p><a href="#">Supplemental section p8-12</a></p> <p><a href="#">Not applicable</a></p> |
| <p><b>Results</b><br/><b>Data</b><br/>12. Describe the flow of patients through the study, including the number of patients included in each stage of the analysis (a diagram may be helpful) and reasons for dropout. Specifically, both overall and for each subgroup extensively examined report the numbers of patients and the number of events.<br/>13. Report distributions of basic demographic characteristics (at least age and sex), standard (disease-specific) prognostic variables, and tumor marker, including numbers of missing values.<br/><b>Analysis and presentation</b><br/>14. Show the relation of the marker to standard prognostic variables.<br/>15. Present univariate analyses showing the relation between the marker and outcome, with the estimated effect (eg, hazard ratio and survival probability). Preferably provide similar analyses for all other variables being analyzed. For the effect of a tumor marker on a time-to-event outcome, a Kaplan-Meier plot is recommended.<br/>16. For key multivariable analyses, report estimated effects (eg, hazard ratio) with confidence intervals for the marker and, at least for the final model, all other variables in the model.<br/>17. Among reported results, provide estimated effects with confidence intervals from an analysis in which the marker and standard prognostic variables are included, regardless of their statistical significance.<br/>18. If done, report results of further investigations, such as checking assumptions, sensitivity analyses, and internal validation.</p>                                                                                                                                                                                                                                                                       | <p><a href="#">Supplemental Figure 1 and Supplemental Table 1</a></p> <p><a href="#">Supplemental Table 1</a></p> <p><a href="#">Not applicable</a><br/><a href="#">Figure 3 and Supplemental Table 2</a></p> <p><a href="#">Table 1 and Supplemental Table 2</a></p> <p><a href="#">Table 1</a></p> <p><a href="#">Sensitivity analysis: Supplemental Tables 2, 4 and 6</a><br/><a href="#">External validation: Supplemental Table 5</a></p>                                                                                                                                                                            |
| <p><b>Discussion</b><br/>19. Interpret the results in the context of the prespecified hypotheses and other relevant studies; include a discussion of limitations of the study.<br/>20. Discuss implications for future research and clinical value.</p>                                                                                                                                                                                                                                                                                                                                                                                                                                                                                                                                                                                                                                                                                                                                                                                                                                                                                                                                                                                                                                                                                                                                                                                                                                                                                                                                                                                                                                                                                                                                                                                                         | <p><a href="#">Discussion section</a></p> <p><a href="#">Discussion section</a></p>                                                                                                                                                                                                                                                                                                                                                                                                                                                                                                                                       |
